1 **TITLE:**

2 **Positive and negative control of helicase recruitment at a bacterial chromosome**  
3 **origin**

4

5 **AUTHORS:**

6 **Charles Winterhalter<sup>1</sup>, Daniel Stevens<sup>1</sup>, Stepan Fenyk<sup>1</sup>, Simone Pelliciarì<sup>1</sup>, Elie**  
7 **Marchand<sup>2</sup>, Nora B Cronin<sup>3</sup>, Panos Soultanas<sup>4</sup>, Tiago R. D. Costa<sup>5</sup>, Aravindan**  
8 **Ilangovan<sup>6,7</sup> and Heath Murray<sup>1,7</sup>**

9

10 <sup>1</sup> Centre for Bacterial Cell Biology, Biosciences Institute, Newcastle University, Newcastle  
11 Upon Tyne, NE2 4AX, UK.

12 <sup>2</sup> Current address: Research Unit in Biology of Microorganisms, Department of Biology,  
13 Université de Namur, Namur, Belgium.

14 <sup>3</sup> LonCEM, London Consortium for Cryo-EM, The Francis Crick Institute, London, NW1 1AT,  
15 UK.

16 <sup>4</sup> Centre for Biomolecular Sciences, School of Chemistry, University of Nottingham,  
17 Nottingham, NG7 2RD, UK.

18 <sup>5</sup> Centre for Molecular Bacteriology and Infection, Department of Life Sciences, Imperial  
19 College, London, SW7 2AZ, UK.

20 <sup>6</sup> Blizard Institute, School of Biological and Behavioral Sciences, Queen Mary University of  
21 London, Newark street, London E1 2AT, UK.

22 <sup>7</sup> Correspondence: [heath.murray@newcastle.ac.uk](mailto:heath.murray@newcastle.ac.uk) and [a.ilangovan@qmul.ac.uk](mailto:a.ilangovan@qmul.ac.uk)

23

24 **RUNNING TITLE:** DnaD regulates bacterial helicase recruitment

25 **ABSTRACT (165 words / 200)**

26 The mechanisms responsible for helicase loading during the initiation of chromosome  
27 replication in bacteria are unclear. Here we report both a positive and a negative mechanism  
28 for directing helicase recruitment in the model organism *Bacillus subtilis*. Systematic  
29 mutagenesis of the essential replication initiation gene *dnaD* and characterization of DnaD  
30 variants revealed protein interfaces required for interacting with the master initiator DnaA  
31 and with a specific single-stranded DNA (ssDNA) sequence located in the chromosome  
32 origin (*DnaD Recognition Element*, “DRE”). We propose that the location of the DRE within  
33 the replication origin orchestrates recruitment of helicase to achieve bidirectional DNA  
34 replication. We also report that the developmentally expressed repressor of DNA replication  
35 initiation, SirA, acts by blocking the interaction of DnaD with DnaA, thereby inhibiting  
36 helicase recruitment to the origin. These findings significantly advance our mechanistic  
37 understanding of helicase recruitment and regulation during bacterial DNA replication  
38 initiation. Because DnaD is essential for the viability of clinically relevant Gram-positive  
39 pathogens, DnaD is an attractive target for drug development.

40

41

42 **KEYWORDS**

43 DNA, replication, initiation, origin, helicase, DnaD, DnaA, SirA



## 44 INTRODUCTION

45 Genome replication most often initiates at specific chromosomal loci termed origins.  
46 Throughout the domains of life, initiator proteins containing a conserved AAA+ (ATPase  
47 Associated with various cellular Activities) motif assemble at chromosome origins and direct  
48 loading of two helicases for bidirectional DNA replication (Bleichert et al., 2017).  
49 Interestingly, while the initiation pathway in both bacteria and eukaryotes culminates in ring  
50 shaped hexameric helicases encircling a single DNA strand, the molecular mechanisms  
51 used to achieve this outcome appear to be distinct (Bell and Kaguni, 2013). Bacteria use  
52 their master initiator DnaA to first unwind the chromosome origin (*oriC*) and then load  
53 helicases around ssDNA such that they are poised to start unwinding. The eukaryotic  
54 initiator ORC (Origin Recognition Complex) also promotes helicase loading, but in this case  
55 the annular enzyme is deposited around double-stranded DNA (dsDNA) in a dormant state  
56 which must subsequently be activated to form an open complex and encircle a single strand.  
57 These distinctions make bacterial DNA replication initiation proteins attractive targets for  
58 antibiotic development (Kaguni, 2018; Robinson et al., 2012; van Eijk et al., 2017).

59 Despite decades of study, the mechanisms underpinning coordinated helicase  
60 recruitment and loading to support bidirectional DNA replication initiation in bacteria are  
61 unclear (Bell and Kaguni, 2013; Coster and Diffley, 2017; Miller et al., 2019; Ticau et al.,  
62 2015). Moreover, bacteria are not known to regulate helicase recruitment, rather they are  
63 thought to modulate the onset of DNA replication by controlling the ability of the ubiquitous  
64 master initiator DnaA to bind and unwind the chromosome origin.

65 DnaA is a multifunctional enzyme composed of four distinct domains that act in  
66 concert during DNA replication initiation (Fig. S1A) (Messer et al., 1999). Domain IV contains  
67 a helix-turn-helix dsDNA binding motif that specifically recognizes 9 base-pair asymmetric  
68 sequences called “DnaA-boxes” (consensus 5'-TTATCCACA-3') (Fujikawa et al., 2003;  
69 Fuller et al., 1984; Roth and Messer, 1995).

70 Domain III is composed of the AAA+ motif that can assemble into an ATP-dependent  
71 right-handed helical oligomer (Erzberger et al., 2006; Erzberger et al., 2002; Schaper and

72 Messer, 1997). Domain III also contains the residues required for a DnaA oligomer to  
73 interact specifically with a trinucleotide ssDNA binding element termed the “DnaA-trio”  
74 (consensus 3'-GAT-5') (Duderstadt et al., 2011; Ozaki et al., 2008; Richardson et al., 2016).  
75 It has been proposed that a DnaA oligomer, guided by DnaA-boxes and DnaA-trios at *oriC*,  
76 interacts with one strand of the DNA duplex to promote chromosome origin opening  
77 (Duderstadt et al., 2011; Pellicciari et al., 2021; Richardson et al., 2016; Richardson et al.,  
78 2019). Additionally, it has been proposed that the AAA+ motif of the DnaA oligomer acts as a  
79 docking site for an essential AAA+ helicase chaperone (DnaI in *B. subtilis*, DnaC in  
80 *Escherichia coli*), thereby directing the recruitment and correct spatial deposition of helicase  
81 onto one DNA strand (Mott et al., 2008).

82 DnaA domain II tethers domains III/IV to domain I, which acts as an interaction hub.  
83 Domain I (DnaA<sup>DI</sup>) facilitates homo-oligomerisation, either directly through a self-interaction  
84 (Weigel et al., 1999) or indirectly via accessory proteins such as DiaA and HobA (Keyamura  
85 et al., 2007; Natrajan et al., 2009). Domain I also interacts with important regulatory proteins  
86 such as HU, Dps and SirA (Chodavarapu et al., 2008a; Chodavarapu et al., 2008b; Jameson  
87 et al., 2014; Rahn-Lee et al., 2011) and has weak affinity for ssDNA (Abe et al., 2007).  
88 Critically, the most important role of DnaA<sup>DI</sup> is thought to be recruiting the replicative  
89 helicase. This may occur either directly, as for *E. coli* DnaA (Sutton et al., 1998), or  
90 indirectly, as for *Bacillus subtilis* DnaA acting as a platform to recruit additional essential  
91 replication initiation proteins (Fig. 1A) (Matthews and Simmons, 2018; Smits et al., 2010).  
92 Interestingly, in both cases a shared surface on DnaA domain I is suggested to be involved  
93 (Fig. S1B-C) (Abe et al., 2007; Keyamura et al., 2009; Martin et al., 2019; Matthews and  
94 Simmons, 2018; Seitz et al., 2000).

95 In *B. subtilis*, DnaA recruits DnaD to the chromosome origin and this action is  
96 required for the sequential recruitment of DnaB, followed by a complex of the DnaC helicase  
97 with its chaperone DnaI (Figure 1A) (Briggs et al., 2012; Marston et al., 2010; Smits et al.,  
98 2010). While DnaD and DnaB are known to be essential factors during both DNA replication  
99 initiation and restart at repaired replication forks (Bruand et al., 2005), a mechanistic

100 understanding of the activities performed by these replication proteins has remained elusive  
101 (Matthews and Simmons, 2018; Rokop and Grossman, 2009; Smits et al., 2010; Smits et al.,  
102 2011).

103 In this paper we focus on DnaD, which will be described as having three domains: N-  
104 terminal domain (DnaD<sup>NTD</sup>), C-terminal domain (DnaD<sup>CTD</sup>) and C-terminal tail (DnaD<sup>CTT</sup>) (Fig.  
105 1C). DnaD<sup>NTD</sup> facilitates oligomerisation (Schneider et al., 2008) and contains a binding site  
106 for DnaA (Matthews and Simmons, 2018), while DnaD<sup>CTD</sup>/DnaD<sup>CTT</sup> is involved in binding  
107 DnaA (Martin et al., 2019) and DNA (Carneiro et al., 2006; Huang et al., 2016), as well as  
108 untwisting the DNA double helix (Zhang et al., 2006; Zhang et al., 2008).

109 To explore the role of DnaD in the mechanism of DNA replication initiation, we  
110 performed a systematic alanine scan to identify residues essential for DnaD activity within its  
111 physiological environment. Structural and functional characterization of DnaD identified  
112 regions required for protein:protein and protein:DNA interactions. The results suggest that  
113 DnaD is recruited to a specific strand of the open complex formed at *oriC* via a new ssDNA  
114 binding motif (the DRE), thus providing a potential route for directing helicase loading.  
115 Moreover, we find that the recruitment of DnaD to DnaA in *B. subtilis* is developmentally  
116 regulated by SirA.

## 117 RESULTS

118 DnaD is an essential DNA replication initiation protein in the model organism *B. subtilis* and  
119 in opportunistic pathogens such as *Staphylococcus aureus* and *Streptococcus pneumoniae*  
120 (Chaudhuri et al., 2009; Kobayashi et al., 2003; Liu et al., 2017). However, the activities  
121 required for DnaD to perform its role at the chromosome origin *in vivo*, and the mechanisms  
122 underlying those activities, are unclear. To address these questions, we sought to identify  
123 essential amino acids in *B. subtilis* DnaD and then to determine the function of each  
124 essential residue.

125

### 126 *Identification of essential residues in DnaD necessary for cellular DNA replication initiation*

127 Functional analysis of bacterial DNA replication initiation proteins *in vivo* is challenging  
128 because they are required for viability; mutation of an essential feature will be lethal, while  
129 mutations that severely disable function can result in the rapid accumulation of  
130 compensatory suppressors. To circumvent these issues, a bespoke inducible  
131 complementation system was developed for *dnaD* ( $P_{HAT}$  *dnaD-ssrA*, Fig. S2 and  
132 Supplementary text). Upon repression of the ectopic *dnaD-ssrA*, the functionality of *dnaD*  
133 alleles at the endogenous locus can be determined.

134 A plasmid for allelic exchange of the endogenous *dnaD* gene was created (Figure  
135 S3). Using this as a template, a library of 222 single alanine substitution mutants (all codons  
136 save for the start, stop and naturally occurring alanine) was generated and sequenced. To  
137 ensure mutagenesis of the native *dnaD* following transformation, a recipient strain was  
138 constructed containing both the *dnaD* operon replaced by *bgaB* (encoding the enzyme  $\beta$ -  
139 galactosidase) and the inducible *dnaD* complementation system (Fig. S3). Thus,  
140 replacement of *bgaB* with *dnaD* alleles can be detected on selective media supplemented  
141 with a chromogenic substrate (white colonies, Fig. 1B) and confirmed by chloramphenicol  
142 sensitivity.

143 Following construction of the *dnaD* alanine substitution library, strains were grown in  
144 a plate reader to assess the functionality of each mutant. The data revealed growth defects

145 for several alanine substitutions, spread throughout the protein (Fig. 1C-F). Immunoblots  
146 were used to determine whether the DnaD variants were being stably expressed (Fig. S4A,  
147 C, E, G), and for those with detectable levels of protein a spot-titre assay was used to  
148 confirm growth phenotypes (Fig. S4B, D, F). We note that the level of DnaD sufficient to  
149 sustain colony formation is below the detection level of our immunoblots (Fig. S5). However,  
150 for the least ambiguous interpretation of the results, we focussed on essential alanine  
151 substitutions that were expressed near the wild-type level.

152 While essential for DNA replication initiation in *B. subtilis*, DnaD has also been  
153 implicated in other key cellular processes including chromosome organization and DNA  
154 repair (Collier et al., 2012; Ishikawa et al., 2007; Smits et al., 2011; Zhang et al., 2005). To  
155 ascertain whether *dnaD* alanine mutants were specifically impaired in DNA replication  
156 initiation, we further characterized chromosome content in these strains using fluorescence  
157 microscopy.

158 During slow steady-state growth, wild-type *B. subtilis* cells typically display a pair of  
159 chromosome origins per nucleoid, each orientated towards a cell pole (Fig. 1G) (Webb et al.,  
160 1997). In contrast, when chromosome replication is inhibited, nucleoids typically contain a  
161 single *oriC* signal located near the centre of the bulk DNA (Imai et al., 2000). Therefore, a  
162 strain harbouring *hbs-gfp* to detect the nucleoid (Kohler and Marahiel, 1997) and a  
163 fluorescent reporter-operator system (*tetO* array with *tetR-mCherry*) (Wang et al., 2014) to  
164 detect the chromosome origin region was used to evaluate the impact of *dnaD* mutants on  
165 DNA replication (Fig. S6A). Strains were imaged following repression of the ectopic *dnaD*-  
166 *ssrA* for 90 minutes. All *dnaD* alanine mutants produced a phenotype characteristic of non-  
167 replicating chromosomes, with well separated chromosomes often containing a single TetR-  
168 mCherry focus (Fig. 1G-H and S6B). Taken together, this analysis identified 14 alanine  
169 substitutions in DnaD that retained detectable protein expression and produced a growth  
170 phenotype, nine of which were essential for DNA replication initiation *in vivo* (Fig. 1E-G).

171

172 *A DnaD tetramer is necessary for DNA replication initiation in vivo*

173 The crystal structure of DnaD<sup>NTD</sup> was solved as a symmetric homodimer, while biochemical  
174 experiments and structural modelling suggest assembly into a tetramer or higher-order  
175 oligomer (Briggs et al., 2012; Schneider et al., 2008). However, the active quaternary  
176 structure of the protein *in vivo* was not known. The DnaD alanine scan showed that  
177 replacement of either Phe6 or Leu22 was lethal (Fig. S4B-C). Mapping these residues onto  
178 the DnaD<sup>NTD</sup> crystal structure (Fig. 2A) reveals that Leu22 is buried within the proposed  
179 dimerization interface and that Phe6 is exposed towards a predicted dimer:dimer interface  
180 (see Fig. S7A, which includes the positions of expressed alanine substitutions with growth  
181 defects and the unexpressed DnaD<sup>K3A</sup> (Fig. S4A). Therefore, we investigated DnaD<sup>F6A</sup> and  
182 DnaD<sup>L22A</sup> for defects in oligomerisation.

183 To begin assessing the DnaD self-interaction a bacterial two-hybrid assay was  
184 employed. Full-length *dnaD* alleles were fused to catalytically complementary fragments of  
185 the *Bordetella pertussis* adenylate cyclase (T25 and T18)(Karimova et al., 1998). Two-hybrid  
186 analysis showed that wild-type DnaD and DnaD<sup>F6A</sup> self-interact, whereas DnaD<sup>L22A</sup> lost this  
187 capability (Fig. 2B). All DnaD proteins reported a positive interaction with wild-type DnaD,  
188 indicating that all *dnaD* alleles were being functionally expressed in the heterologous host  
189 (Fig. 2B). These results suggest that Leu22 is involved in DnaD dimer formation.

190 To further interrogate the quaternary structure of DnaD, we purified DnaD<sup>L22A</sup> and  
191 DnaD<sup>F6A</sup> and characterised these variants by size exclusion chromatography (SEC) (Hagel,  
192 2001) followed by multiple angle light scattering (MALS) (Wyatt, 1993). Wild-type DnaD was  
193 observed to run as a stable tetramer of approximately 113 kDa (theoretical molecular weight  
194 of 110 kDa) (Fig. 2C). SEC-MALS analysis showed that >50% of DnaD<sup>L22A</sup> dissociated into a  
195 29 kDa monomer, whereas DnaD<sup>F6A</sup> was eluted exclusively as 57 kDa species, consistent  
196 with the protein forming a stable dimer (Fig. 2C). Crosslinking with amine-specific  
197 bis(sulfosuccinimidyl)suberate (BS<sup>3</sup>) confirmed that DnaD<sup>F6A</sup> was competent to form a dimer  
198 but defective to form a tetramer (Fig. 2D). Returning to the *dnaD* alanine scan we  
199 appreciated that *dnaD*<sup>K3A</sup> was also lethal, albeit poorly expressed *in vivo* (Fig. S4A).  
200 Crosslinking showed that DnaD<sup>K3A</sup> could also form a dimer but not a tetramer, akin to

201 DnaD<sup>F6A</sup> (Fig. 2D). Taken together, the data indicate that DnaD tetramerization is mediated  
202 by residues located near the N-terminus and that adopting this quaternary state is necessary  
203 to support DNA replication initiation *in vivo*.

204

#### 205 *Architecture of a DnaD dimer determined by cryo electron microscopy*

206 To elucidate the quaternary structure of DnaD, we characterized the structure of the full-  
207 length protein using single particle cryo electron microscopy (cryo-EM). Although the wild-  
208 type tetrameric DnaD was used, it was clear from the cryo-EM data that only a pair of  
209 proteins was observable (Fig. 2E). Data analysis from 2D classes (Fig. 2E) and image  
210 processing revealed a 10 Å resolution map of a DnaD dimer (Fig. 2F and S7B). DnaD<sup>CTD</sup>  
211 subunits and the β-hairpin within the DnaD<sup>NTD</sup> were immediately identified within the cryo-EM  
212 map, and a poly alanine model of full-length DnaD encompassing a pair of DnaD<sup>NTD</sup> and  
213 DnaD<sup>CTD</sup> could be recognised (Fig. S7C). While the previously published DnaD<sup>CTD</sup> structure  
214 (PDB 2zc2) agrees well with the cryo-EM model, some differences were observed with the  
215 arrangement of α-helices and β-strands described in the crystal structure of the DnaD<sup>NTD</sup>  
216 (PDB 2v79) (Schneider et al., 2008). The conditions surrounding these two states and their  
217 functional relevance were not explored further. These differences notwithstanding, the cryo-  
218 EM map reveals for the first time that the DnaD<sup>NTD</sup> and DnaD<sup>CTD</sup> pack against each other to  
219 form a compact structure. The placement of the DnaD<sup>CTD</sup> suggest that the DnaD<sup>CTT</sup>, which  
220 was not assigned within the map, would extend from a location on the opposite face to the  
221 proposed dimer:dimer interface (Fig. S7C). Implications of the DnaD structure on protein  
222 function are explored below.

223

#### 224 *The interaction between DnaD<sup>CTT</sup> and DnaB is necessary for DNA replication initiation in* 225 *vivo*

226 The alanine scan indicated that a cluster of residues in the unstructured C-terminal tail of  
227 DnaD were critical for cell growth, particularly Trp229 which is essential (Fig. 3A and S4F-  
228 G). Phylogenetic analysis indicated that Trp229 was conserved in species harbouring both



229 *dnaD* and *dnaB*, but not *dnaD* alone, suggesting that the DnaD<sup>CTT</sup> could be an interaction  
230 site for DnaB (Fig. S8A).

231 To test this hypothesis, two-hybrid analysis was used to probe for a direct  
232 protein:protein interaction. The results showed that wild-type DnaD and DnaB interact and  
233 that both the lethal allele *dnaD*<sup>W229A</sup> and deletion of the last eight amino acids break this  
234 interaction (Fig. 3B). It was also observed that the monomeric DnaD<sup>L22A</sup> was unable to  
235 interact with DnaB, whereas the dimeric DnaD<sup>F6A</sup> retained this capability (Fig. 3B). All protein  
236 variants retained a self-interaction with wild-type DnaD, showing that they were being  
237 functionally expressed (Fig. 3B). These results indicate that the interface between the distal  
238 end of DnaD<sup>CTT</sup> and DnaB is essential for DNA replication initiation *in vivo*, and they suggest  
239 that DnaB recognition requires DnaD assembly into a homodimer.

240 Previous studies using protein truncation variants indicated that the DnaD<sup>NTD</sup>  
241 interacts with DnaB (Matthews and Simmons, 2018). The observation that mutations in the  
242 DnaD<sup>CTT</sup> abolish the interaction with DnaB (where the DnaD<sup>NTD</sup> is present) suggests that  
243 different interactions are being detected in these assays. We note that the N-terminal  
244 domains of DnaD and DnaB share structural homology (Fig. S8B) and both promote  
245 dimerization/tetramerization, such that the truncated variants may be able to interact  
246 differentially in a two-hybrid experiment.

247

248 *The interaction between DnaD<sup>NTD</sup> and DnaA is necessary for DNA replication initiation in*  
249 *vivo*

250 Models for the interaction between DnaD and DnaA have been proposed based on binding  
251 experiments using truncated proteins. These studies indicated that residues in the DnaD<sup>NTD</sup>  
252 (Matthews and Simmons, 2018) and the DnaD<sup>CTD</sup> (Martin et al., 2019) each contributed to  
253 DnaA binding. From the alanine scan it was observed that three of the proposed residues at  
254 the DnaA interface of the DnaD<sup>NTD</sup> are essential (Phe51, Ile83, Glu95). Additionally, we  
255 identified two other lethal substitutions (DnaD<sup>P54A</sup> and DnaD<sup>I92A</sup>) that mapped near these



256 sites on the structure, suggesting they could also be involved in the DnaA interface (Fig. 3C  
257 and S4D-E).

258 In contrast, none of the residues in the DnaD<sup>CTD</sup> were found to be essential (Fig.  
259 S9A-C). To investigate whether the interface between DnaD<sup>CTD</sup> and DnaA was robust and  
260 single alanine substitutions were insufficient to disrupt binding, DnaD variants encoding  
261 multiple alanine substitutions were constructed (*dnaD*<sup>L129A/I132A</sup>, *dnaD*<sup>Y130A/E134A/E135A</sup>,  
262 *dnaD*<sup>I132A/E134A/E135A</sup>, *dnaD*<sup>K164A/K168A/E169A/V171A</sup>) (Fig. S9D-G). However, all of these *dnaD*  
263 alleles were viable (Fig. S9C). These results indicate that the interface between DnaA and  
264 the DnaD<sup>CTD</sup> is not essential for DNA replication initiation *in vivo*. The DnaD<sup>CTD</sup>-DnaA  
265 interaction could play an auxiliary role that assists DnaD binding DnaA, or alternatively it  
266 could become important during certain environmental conditions or cell stresses.

267 Two-hybrid analysis was used to investigate whether alanine substitutions in  
268 DnaD<sup>NTD</sup> perturb the interaction with DnaA. It was known that expression of *B. subtilis* DnaA  
269 in *E. coli* perturbs DNA replication and inhibits cell growth, presumably by competing with the  
270 endogenous homolog for binding DnaA-boxes within *oriC* (Andrup et al., 1988; Krause and  
271 Messer, 1999), and it was previously reported that interactions between full-length *B. subtilis*  
272 DNA replication initiation proteins could not be detected (Matthews and Simmons, 2018). To  
273 circumvent the toxicity elicited by *B. subtilis* DnaA, we reduced selective pressure by  
274 constructing a derivative of the *E. coli* two-hybrid strain with a deletion of the *rnhA* gene. This  
275 strain can initiate replication at stable R-loops that are normally removed by RNase HI and  
276 this mode of DNA replication initiation is independent of DnaA and *oriC* (Kogoma and von  
277 Meyenburg, 1983). Using this approach an interaction between the full-length DnaD and  
278 DnaA proteins was detected (Fig. 3D). In contrast, alanine substitutions within the proposed  
279 DnaD<sup>NTD</sup> interface for DnaA abrogated this association (Fig. 3D). All DnaD<sup>NTD</sup> variants  
280 retained the ability to self-interact, indicating that they were being functionally expressed.  
281 These results indicate that a direct interaction between DnaA and DnaD<sup>NTD</sup> is essential for  
282 DNA replication initiation *in vivo*.

283

284 *The interaction between DnaA<sup>DI</sup> and DnaD is necessary for DNA replication initiation in vivo*  
285 Having identified sites on DnaD for protein:protein interactions, we further investigated the  
286 complex formed with the master initiator DnaA. Previous two-hybrid and NMR studies  
287 identified residues on the surface of DnaA<sup>DI</sup> that interact with DnaD (Martin et al., 2019;  
288 Matthews and Simmons, 2018). To investigate the physiological relevance of the proposed  
289 DnaA<sup>DI</sup> interface with DnaD *in vivo*, we replaced the endogenous *dnaA* gene with mutant  
290 variants encoding alanine substitutions at key residues (*dnaA*<sup>T26A</sup>, *dnaA*<sup>W27A</sup>, *dnaA*<sup>F49A</sup>) (Fig.  
291 3E). To enable identification of essential amino acid residues without selecting for  
292 suppressor mutations, we utilized a strain in which DNA replication can initiate from a  
293 plasmid origin (*oriN*) integrated into the chromosome (Fig. 3F) (Richardson et al., 2016).  
294 Activity of *oriN* requires its cognate initiator protein RepN; both factors act independently of  
295 *oriC*/DnaA (note the RepN/*oriN* system does require DnaD and DnaB for function) (Fig.  
296 S10A-C) (Hassan et al., 1997). Expression of *repN* was placed under the control of an IPTG-  
297 inducible promoter, thus permitting both the introduction of mutations into *dnaA* and their  
298 subsequent analysis following removal of the inducer to repress *oriN* activity. Cultures were  
299 grown overnight in the presence of IPTG and then serially diluted onto solid media. The  
300 results showed that the *dnaA*<sup>T26A</sup>, *dnaA*<sup>W27A</sup> and *dnaA*<sup>F49A</sup> mutants all inhibited colony  
301 formation (Fig. 3G). Immunoblot analysis indicated that all of the DnaA variants were  
302 expressed at a level similar to wild-type (Fig. S10B). This analysis indicates that residues  
303 Thr26, Trp27 and Phe49 are essential for DnaA activity *in vivo*.

304 Two-hybrid analysis confirmed that alanine substitutions in DnaA at either Thr26,  
305 Trp27 or Phe49 inhibit the interaction with DnaD (Fig. 3H). These DnaA variants retained the  
306 ability to self-interact with the wild-type protein, indicating that they are being functionally  
307 expressed (Fig. 3H). Therefore, the essential residues in DnaA<sup>DI</sup> are required to bind DnaD.  
308 To investigate whether DnaA<sup>DI</sup> and DnaD<sup>NTD</sup> were sufficient to form a complex, pull-down  
309 assays between protein domains His<sub>6</sub>-DnaA<sup>DI</sup> and DnaD<sup>NTD</sup> were performed (Fig. S11A).  
310 Following expression of His<sub>6</sub>-DnaA<sup>DI</sup> and DnaD<sup>NTD</sup> in *E. coli*, cells were lysed and His<sub>6</sub>-  
311 DnaA<sup>DI</sup> was captured using an immobilized nickel affinity chromatography spin column.

312 While the wild-type DnaD<sup>NTD</sup> was able to bind wild-type His<sub>6</sub>-DnaA<sup>DI</sup>, amino acid  
313 substitutions in either protein domain greatly reduced the retention of DnaD<sup>NTD</sup> (Fig. S11B).  
314 Staining of SDS-PAGE revealed that all protein domains were being overexpressed to  
315 similar levels (Fig. S11C) and immunoblotting confirmed the identity of each polypeptide  
316 (Fig. S11D). These studies support and extend the previously proposed model for DnaA<sup>DI</sup>  
317 interacting with DnaD<sup>NTD</sup> (Matthews and Simmons, 2018), critically showing that this  
318 protein:protein interface is essential for DNA replication initiation *in vivo*.

319

320 *The interaction of DnaA<sup>DI</sup> with DnaD<sup>NTD</sup> is required to recruit DnaD to the chromosome origin*

321 It has been observed that DnaA recruits DnaD to the replication origin (Smits et al., 2010)  
322 and we hypothesized that this could be the essential function of the DnaA<sup>DI</sup>-DnaD<sup>NTD</sup>  
323 interaction. To test this model, we employed chromatin immunoprecipitation (ChIP). To  
324 support growth of lethal *dnaA* mutants, a strain harbouring a constitutively active version of  
325 *oriN* in the chromosome was used. In all cases, DnaA<sup>DI</sup> variants remained specifically  
326 enriched at *oriC* while recruitment of DnaD was abolished (Fig. 4A). Note that in these  
327 strains DnaD remained enriched at *oriN*, as expected (Fig. 4B) (Smits et al., 2011). These  
328 data are consistent with the proposal that an essential function of the DnaA<sup>DI</sup>-DnaD<sup>NTD</sup>  
329 interaction is to recruit DnaD to the chromosome origin. Intriguingly, the surface of DnaA<sup>DI</sup>  
330 interacting with DnaD is also the binding site for the developmentally expressed DNA  
331 replication inhibitor SirA, raising the possibility that SirA could compete with DnaD for binding  
332 DnaA (Fig. 4C) (Jameson et al., 2014; Rahn-Lee et al., 2011).

333

334 *SirA binding to DnaA inhibits recruitment of DnaD and DnaB to oriC*

335 During endospore development *B. subtilis* requires two chromosomes, one for each  
336 differentiated cell type (Errington, 2003). To help ensure diploidy after executing the  
337 commitment to sporulate, cells express the negative regulator of DNA replication initiation  
338 SirA (Rahn-Lee et al., 2009; Wagner et al., 2009). It was proposed that SirA represses DNA  
339 replication initiation by inhibiting DnaA binding to *oriC* (Rahn-Lee et al., 2011). However, in

340 the previous study SirA activity was analysed following artificial activation of sporulation, a  
341 complex developmental pathway involving the activation and/or induction of hundreds of  
342 genes including the master regulator Spo0A (Fawcett et al., 2000), which itself is known to  
343 inhibit DNA replication initiation by binding at *oriC* (Boonstra et al., 2013). Therefore,  
344 considering the data presented above, we hypothesized that SirA might occlude DnaD from  
345 binding to DnaA, thereby inhibiting recruitment of DnaD to *oriC*.

346 Using a strain containing *sirA* under the control of an IPTG-inducible promoter, SirA  
347 was expressed for 30 minutes during mid-exponential growth. ChIP of wild-type DnaA  
348 revealed stable enrichment at *oriC* following SirA expression (Fig. 4D), indicating that under  
349 these conditions SirA does not inhibit DnaA binding to DNA. ChIP of DnaD showed  
350 enrichment was abolished, consistent with the model that SirA inhibits DnaD binding to  
351 DnaA. Furthermore, enrichment of the helicase loader DnaB at *oriC*, which requires prior  
352 binding of DnaD (Smits et al., 2010), was also lost following induction of *sirA* (Fig. S12).  
353 When the ChIP experiments were repeated using alleles of *dnaA* (N47S, A50V) that  
354 suppress SirA by inhibiting its binding to DnaA<sup>DI</sup> (Rahn-Lee et al., 2011), enrichment of  
355 DnaD at *oriC* was restored to a degree that correlated with the penetrance of the *dnaA*  
356 suppressor mutations (Fig. 4D) (Jameson et al., 2014).

357 To investigate whether SirA and DnaD binding to DnaA<sup>DI</sup> is mutually exclusive, we  
358 set up a competition experiment. A strain was engineered with ectopic copies of *sirA* and  
359 *dnaD* under the control of inducible promoters (IPTG and xylose, respectively; Fig. S13A).  
360 While expression of SirA alone inhibited growth, co-expression with DnaD significantly  
361 ameliorated this effect (Fig. 4E and S13B-D). However, expression of DnaD variants  
362 defective for binding DnaA (DnaD<sup>F51A</sup>, DnaD<sup>I83A</sup> or DnaD<sup>E95A</sup>) did not reverse the SirA-  
363 mediated growth inhibition (Fig. S13E-F). Taken together, the results suggest that SirA  
364 inhibits DNA replication initiation by directly occluding the binding of DnaD to DnaA.

365

366 *DnaD<sup>CTT</sup> ssDNA binding activity is essential for DNA replication initiation in vivo*

367 It has been established that DnaD has an affinity for DNA and previous studies employing  
368 protein deletions reported that this activity involves the DnaD<sup>CTT</sup> (Huang et al., 2016;  
369 Marston et al., 2010; Smits et al., 2011). Therefore, it was conspicuous that the alanine scan  
370 did not identify an essential residue suggesting a role in DNA binding within this protein  
371 domain (Fig. 1C). Alignment of DnaD<sup>CTT</sup> homologues showed the recurrence of positively  
372 charged and aromatic residues within this domain (Fig. 5A). Based on these findings, we  
373 hypothesized that the DnaD<sup>CTT</sup> contains a robust DNA binding motif.

374 *dnaD* alleles encoding multiple alanine substitutions with the DnaD<sup>CTT</sup> were  
375 constructed. Spot titre analysis revealed that substitutions replacing two clusters of residues  
376 (DnaD<sup>7A</sup>) resulted in an observable growth defect (Fig. 5B) and immunoblots confirmed the  
377 expression of each protein (Fig. S14A). Characterisation of DnaD<sup>7A</sup> by fluorescence  
378 microscopy revealed an apparent DNA replication defect, with cells containing a lower  
379 number of *oriC* per nucleoid (Fig. 5C-D). Marker frequency analysis confirmed that DnaD<sup>7A</sup>  
380 displays a decreased DNA replication initiation frequency compared to wild-type cells (Fig.  
381 S14B).

382 To directly investigate the DNA binding activity of DnaD *in vitro*, we established a  
383 fluorescence polarization assay to detect the binding of purified DnaD to fluorescein labelled  
384 substrates (Fig. 5E) (Moerke, 2009). It was found that wild-type DnaD binds ssDNA with a  
385 higher affinity than dsDNA, it displays a preference for thymidine, and it requires a substrate  
386 at least 15 nucleotides long (Fig. 5F). Moreover, using oligomerization mutants it was  
387 observed that monomeric DnaD<sup>L22A</sup> could not bind ssDNA, whereas dimeric DnaD<sup>F6A</sup>  
388 retained this activity with a binding profile comparable to wild-type (Fig. 5G).

389 Next we purified several DnaD variants with alterations to the C-terminal tail,  
390 including DnaD<sup>7A</sup> and two truncations, which removed either the DnaB interaction patch  
391 (DnaD<sup>1-224</sup>) or the entire C-terminal tail containing the putative ssDNA binding region (DnaD<sup>1-  
392 205</sup>). Both DnaD<sup>7A</sup> and DnaD<sup>1-205</sup> were unable to interact with a fluorescently labelled  
393 polythymidine (dT<sub>40</sub>) substrate, whereas DnaD<sup>1-224</sup> retained this activity (Fig. 5H). Size  
394 exclusion chromatography showed that the both DnaD<sup>7A</sup> and DnaD<sup>1-205</sup> assembled into a

395 tetramer (Fig. S14C-D), indicating that the overall structure of the proteins remained intact.  
396 Combined with the *in vivo* analysis, the results suggest that the essential activity of DnaD  
397 located between residues 205-224 is to bind ssDNA.

398

399 *DnaD recognizes a specific single-strand DNA binding element within the unwinding region*  
400 *of oriC*

401 During the interrogation of DnaD ssDNA binding activity *in vitro*, we found that the wild-type  
402 protein had the highest affinity for a substrate with a sequence found within the unwinding  
403 region of *B. subtilis oriC*, the complement of the DnaA-trios (5'-CTACTATTACTTCTACTA-3')  
404 (Fig. 6A-B). Based on this sequence, and on the observation that DnaD binds the dT<sub>18</sub>  
405 substrate better than other homopolymeric ssDNA (Fig. S15A-B), we hypothesized that  
406 thymidine might be a specificity determinant.

407 To identify key nucleotide positions within this ssDNA sequence, thymidine bases  
408 were systematically inserted within an inert dC<sub>18</sub> substrate and DnaD binding was assessed  
409 using fluorescence polarization. The results indicate that two motifs of 5'-TnnT-3' are  
410 necessary and sufficient for DnaD to associate specifically with the ssDNA substrate (Fig.  
411 6C, S15C-D). The symmetry of these repeated motifs suggest that DnaD may bind to ssDNA  
412 as a dimer, consistent with the observation that monomeric DnaD<sup>L22A</sup> cannot bind ssDNA  
413 (Fig. 5G). Based on these properties, we have termed the ssDNA sequence complementary  
414 to the DnaA-trios the *DnaD Recognition Element (DRE)*, and we propose that the 5'-TnnT-3'  
415 motifs are critical for DnaD binding.

416

417 *Disrupting the DRE impairs cell viability*

418 The DnaA-trios and the DRE appear to be inherently linked ssDNA binding motifs, in which  
419 each could potentially be recognized by a distinct replication initiation protein, DnaA and  
420 DnaD, respectively. Previous studies have suggested that the DnaA-trios closest to the  
421 DnaA-boxes are critical for DnaA unwinding activity (Jaworski et al., 2021; Pellicciari et al.,  
422 2021; Richardson et al., 2016; Richardson et al., 2019). Therefore, we hypothesized that

423 mutating the 5'-TnnT-3' motif furthest from the DnaA-boxes might preferentially inhibit DnaD  
424 activity while leaving DnaA relatively unperturbed. Consistent with this notion, using an *in*  
425 *vitro* DnaA strand separation assay it was observed that DnaA activity was not compromised  
426 when the distal 5'-TnnT-3' motif was changed to 5'-AnnA-3' (Fig. S15E, note that these  
427 mutations alter the two distal DnaA-trios).

428         Guided by the *in vitro* results, a strain was engineered to mutate the 5'-TnnT-3' motif  
429 furthest from the DnaA-boxes within the DRE (5'-CTACTATTACTTCTACTA-3' → 5'-  
430 CTACTATTACTTCAACAA-3'). We observed that this mutant displays a growth defect at  
431 20°C (Fig. 6D). Fluorescence microscopy showed that the DRE mutant contains fewer *oriC*  
432 per nucleoid (Fig. 6E and S15F) and an increase in the number of cells lacking DNA (Fig. 6F  
433 and S15G). Marker frequency analysis confirmed that the DRE mutant has a lower DNA  
434 replication initiation frequency compared to wild-type cells (Fig. S15H). Taken together, the  
435 results are consistent with the DRE functioning as a ssDNA binding site within the *B. subtilis*  
436 chromosome origin unwinding region.



## 437 **DISCUSSION**

438 The molecular basis for how bacteria recruit a pair of helicases at their chromosome origin to  
439 promote bidirectional DNA replication is unknown. Characterization of the essential DNA  
440 replication initiation protein DnaD (summarized in Fig. 7A) identified a new ssDNA binding  
441 motif (DRE) within the *B. subtilis* chromosome origin. The location of the DRE suggests a  
442 mechanism for directing helicase loading to support bidirectional DNA replication.

443

### 444 *A mechanism for bidirectional DNA replication at a bacterial chromosome origin*

445 Based on structural and biochemical studies, a model was proposed for helicase loading at  
446 one end of a DnaA oligomer, where the AAA+ class of helicase chaperone (DnaI in *B.*  
447 *subtilis*, DnaC in *E. coli*) engages the AAA+ motif of DnaA and guides deposition of a  
448 helicase onto ssDNA (Fig. 7B) (Mott et al., 2008). This mechanism results in helicase  
449 loading around ssDNA in the correct orientation for 5'→3' translocation.

450 In contrast, the mechanism for loading a helicase onto the complementary strand  
451 with the correct geometry was unclear, although it was suggested that the interaction  
452 between DnaA<sup>DI</sup> and helicase<sup>NTD</sup> might be sufficient. In *E. coli*, biochemical and genetic  
453 assays have suggested that DnaA domain I interacts directly with the helicase (Seitz et al.,  
454 2000; Sutton et al., 1998). Moreover, it has been shown that DnaA<sup>E21</sup> is essential for *E. coli*  
455 viability and required for helicase loading *in vitro* (Abe et al., 2007). Here in *B. subtilis* we  
456 identified residues in DnaA<sup>DI</sup> that are essential for cell viability and required for the direct  
457 recruitment of DnaD to *oriC*. Generalizing, it appears that DnaA<sup>DI</sup> is critical for helicase  
458 recruitment in diverse bacterial species, albeit through different mechanisms. Importantly  
459 however, these protein:protein interactions alone do not resolve how a second helicase is  
460 recruited to a specific DNA strand for bidirectional replication.

461 Many bacterial chromosome origins encode a core set of sequence elements that  
462 direct DnaA oligomerization onto ssDNA, thus dictating the strand onto which the AAA+  
463 helicase chaperone docks (Pellicciari et al., 2021). Here we report that the DRE, located  
464 opposite to where the DnaA oligomer binds, provides a mechanism for orchestrating strand-



465 specific DnaD recruitment. Considered together with studies of primosome assembly at a  
466 single-strand origin *in vivo* where binding of DnaD to ssDNA promoted subsequent helicase  
467 loading (Bruand et al., 1995) (Fig. S16), we propose that the specific interaction of DnaD  
468 with the DRE provides a pathway for loading a second helicase to support bidirectional DNA  
469 replication.

470         The proposed model for DnaD recruitment raises several fundamental questions.  
471 How does DnaD (along with DnaA and DnaB) orientate the DnaI:helicase complex? We  
472 speculate that within the open complex formed at *oriC*, the junction between dsDNA and  
473 ssDNA could direct the subsequent events. Additionally, the nucleoprotein complexes  
474 formed at *oriC* between DnaA, DnaD and DnaB could play a role.

475         How is the temporal loading of two helicases orchestrated? Studies of helicase  
476 loading onto artificial DNA scaffolds that mimic an open origin indicated that DnaA  
477 preferentially recruits helicase onto the strand corresponding to where the DRE is located  
478 (Weigel and Seitz, 2002). Whether this order of recruitment holds during the physiological  
479 helicase loading reaction is unclear. While we favour a model where loading of the two  
480 helicases at *oriC* is reproducibly sequential, an alternative hypothesis is that loading of the  
481 two helicases is stochastic.

482         Are there other sequence elements within *oriC* that direct helicase loading? The  
483 discovery of the DnaA-trios and the DRE indicate that bacterial chromosome origins encode  
484 more information than previously appreciated. We note that many chromosome origins  
485 contain an intrinsically unstable AT-rich region (Kowalski and Eddy, 1989; Krause et al.,  
486 1997) where one of the helicases is loaded *in vitro* (Fang et al., 1999). We wonder whether  
487 additional sequence dependent information may be located within these AT-rich sites, or  
488 elsewhere. Further characterization of the nucleoprotein complexes formed at *oriC*, as well  
489 as dissection of downstream helicase loader proteins, will be needed to provide answers.

490

491 *Regulation of helicase recruitment in bacteria*

492 Here we report that the essential DnaA<sup>DI</sup>-DnaD<sup>NTD</sup> interface is targeted by the inhibitor of  
493 DNA replication initiation SirA, which binds DnaA<sup>DI</sup> and occludes DnaD (Fig. 4E). To our  
494 knowledge, this is the first description of a bacterial mechanism for regulating helicase  
495 recruitment. Interestingly, while the interaction of SirA with DnaA<sup>DI</sup> inhibits helicase  
496 recruitment at the chromosome origin during endospore development (Fig. 7C), this  
497 regulatory system would not perturb the interaction of DnaD with the replication restart  
498 primosome (Huang et al., 2016) required to ensure completion of genome replication (Fig.  
499 S16).

500 While SirA is the first example of an endogenous bacterial system that regulates  
501 helicase recruitment, we note that diverse viruses effectively hijack the bacterial helicase  
502 loading pathway during their infective life cycle (Hood and Berger, 2016; Kimura et al., 2010;  
503 Klein et al., 1980; Noguchi and Katayama, 2016; Odegrip et al., 2000). Homologs of *dnaD*  
504 are present in the majority of *Firmicutes* including several clinically relevant human  
505 pathogens such as *Staphylococcus*, *Streptococcus*, *Enterococcus*, and *Listeria* (Briggs et  
506 al., 2012). Moreover, replication of *S. aureus* multiresistant plasmids have been shown to  
507 require an initiation protein with structural homology to DnaD (Schumacher et al., 2014).  
508 Therefore, the multiple essential activities of DnaD, combined with the appreciation that  
509 helicase recruitment and loading mechanisms in bacteria and eukaryotes are distinct,  
510 indicates that DnaD homologs are an attractive target for antibacterial drug development.

511

512

## 513 **METHODS**

### 514 *Media and chemicals*

515 Nutrient agar (NA; Oxoid) was used for routine selection and maintenance of both *B. subtilis*  
516 and *E. coli* strains. For experiments in *B. subtilis* cells were grown using Luria-Bertani  
517 medium (LB). Supplements were added as required: ampicillin (100 µg/ml), chloramphenicol  
518 (5 µg/ml), kanamycin (5 µg/ml), spectinomycin (50 µg/ml). All chemicals and reagents were  
519 obtained from Sigma-Aldrich unless otherwise noted.

520

### 521 *Microscopy*

522 To visualize cells during the exponential growth phase, starter cultures were grown in  
523 imaging medium (Spizizen minimal medium supplemented with 0.001 mg/mL ferric  
524 ammonium citrate, 6 mM magnesium sulphate, 0.1 mM calcium chloride, 0.13 mM  
525 manganese sulphate, 0.1% glutamate, 0.02 mg/mL tryptophan) with 0.5% glycerol, 0.2%  
526 casein hydrolysate and 0.1 mM IPTG. Saturated cultures were diluted 1:100 into fresh  
527 imaging medium supplemented with 0.5% glycerol and 0.1 mM IPTG and allowed to grow for  
528 three mass doublings. Early log cells were then spun down for 5 minutes at 9000 rpm,  
529 resuspended in the same medium lacking IPTG and further incubated for 90 minutes before  
530 imaging.

531 Cells were mounted on ~1.4% agar pads (in sterile ultrapure water) and a 0.13- to  
532 0.17-mm glass coverslip (VWR) was placed on top. Microscopy was performed on an  
533 inverted epifluorescence microscope (Nikon Ti) fitted with a Plan Apochromat Objective  
534 (Nikon DM 100x/1.40 Oil Ph3). Light was transmitted from a CoolLED pE-300 lamp through  
535 a liquid light guide (Sutter Instruments), and images were collected using a Prime CMOS  
536 camera (Photometrics). The fluorescence filter sets were from Chroma: GFP (49002,  
537 EX470/40 (EM), DM495lpxr (BS), EM525/50 (EM)) and mCherry (49008, EX560/40 (EM),  
538 DM585lprx (BS), EM630/75 (EM)). Digital images were acquired using METAMORPH  
539 software (version 7.7) and analysed using Fiji software (Schindelin et al., 2012). All

540 experiments were independently performed at least twice, and representative data are  
541 shown.

542         The number of origins was quantified using the Trackmate plugin within the Fiji  
543 software (Tinevez et al., 2017). Background was subtracted from fluorescence images set to  
544 detect 8-10 pixel blob diameter foci over an intensity threshold of 150 relative fluorescence  
545 units. A mask containing the detected origin foci was created and merged with the nucleoids  
546 channel, and the number of origins per nucleoid was determined and averaged for a  
547 minimum of 100 cells from each strain that was examined. For origin and *dnaD*<sup>7A</sup> mutants,  
548 the count of nucleoids was determined using line plots of a 10 pixel width drawn across the  
549 length of cells. For each field of view, an average of the whole cell fluorescence was  
550 measured and used to normalise individual line plots, and the exact number of nucleoids per  
551 cell was assessed by counting the number of peaks crossing the zero line.

552

#### 553 *Phenotype analysis of dnaA mutants using the inducible oriN strain*

554 Strains were grown for 48 hours at 37°C on NA plates supplemented with kanamycin either  
555 with or without IPTG (0.1 mM). All experiments were independently performed at least twice  
556 and representative data is shown.

557

#### 558 *Phenotype analysis of dnaD mutants using the inducible dnaD-ssrA strain*

559 Strains were grown for 18 hours at 37°C on NA plates (spot-titre assays) or in Penassay  
560 Broth (PAB, plate reader experiments) either with or without IPTG (0.1 mM). All experiments  
561 were independently performed at least twice and representative data is shown.

562

#### 563 *Phenotype analysis of origin mutants*

564 Strains were grown for 72 hours at 20°C or 37°C on NA plates. All experiments were  
565 independently performed at least twice and representative data is shown.

566

#### 567 *Bacterial two-hybrid assay*

568 *Escherichia coli* strain HM1784 was transformed using a combination of complementary  
569 plasmids and grown to an OD<sub>600nm</sub> of 0.5 in LB containing ampicillin and spectinomycin,  
570 before diluting 1:10,000 and spotting onto nutrient agar plates containing antibiotics and the  
571 indicator X-gal (0.008%). Plates were incubated at 30°C for 48 hours and imaged using a  
572 digital camera. Experiments were independently performed at least twice and representative  
573 data is shown.

574

#### 575 *Immunoblot analysis*

576 Proteins were separated by electrophoresis using a NuPAGE 4-12% Bis-Tris gradient gel  
577 run in MES buffer (Life Technologies) and transferred to a Hybond-P PVDF membrane (GE  
578 Healthcare) using a semi-dry apparatus (Bio-rad Trans-Blot Turbo). DnaA, DnaD and FtsZ  
579 were probed with polyclonal primary antibodies (Eurogentec) and then detected with an anti-  
580 rabbit horseradish peroxidase-linked secondary antibody using an ImageQuant LAS 4000  
581 mini digital imaging system (GE Healthcare). Detection of DnaA, DnaD and FtsZ was within  
582 a linear range. Experiments were independently performed at least twice and representative  
583 data is shown.

584

#### 585 *Pull-down assay of His<sub>6</sub>-DnaA<sup>DI</sup>-DnaD<sup>NTD</sup> complexes*

586 BL21 (DE3) *E. coli* cells containing the different expression plasmids (pSP075, pSP080,  
587 pSP081, pSP082, pSP083 and pSP085) were grown overnight in 5 ml of LB supplemented  
588 with kanamycin at 37°C. The following day cells were diluted in 50 ml of fresh medium until  
589 A<sub>600</sub> reached 0.5. Protein expression was induced by adding 1 mM IPTG for 4 hours at 30°C.  
590 Cells were collected by centrifugation and resuspended in 2 ml of resuspension buffer (30 mM  
591 Hepes pH 7.5, 250 mM potassium glutamate, 10 mM magnesium acetate, 20% sucrose, 30  
592 mM imidazole) supplemented with 1 EDTA-free protease inhibitor tablet. Bacteria were lysed  
593 with two sonication cycles at 10 W for 3 minutes with 2 second pulses. Cell debris were  
594 pelleted by centrifugation at 25,000 g at 4°C for 30 minutes and the supernatant was filtered  
595 through 0.2 µm filters. The clarified lysate was then loaded onto Ni-NTA spin columns

596 (QIAGEN) and proteins purified according to manufacturer protocol washing the column with  
597 Washing Buffer (30 mM Hepes pH 7.5, 250 mM potassium glutamate, 10 mM magnesium  
598 acetate, 20% sucrose, 100 mM imidazole) and eluting bound proteins with elution buffer (30  
599 mM Hepes pH 7.5, 250 mM potassium glutamate, 10 mM magnesium acetate, 20% sucrose,  
600 1 M imidazole). The eluates were loaded on a NuPAGE 4-12% Bis-Tris gradient gel run in  
601 MES buffer (Life Technologies) and analysed with InstantBlue staining (Merck).

602

### 603 *ChIP-qPCR*

604 Chromatin immunoprecipitation and quantitative PCR were performed as previously  
605 described (Fisher et al., 2017) with minor modification (see Supplementary Methods).

606

### 607 *Cryo-EM Sample Preparation and Data Collection*

608 Four-microliter samples of purified wild-type DnaD were applied to plasma-cleaned Ultrafoil  
609 2/2 200 grids, followed by plunge-freezing in liquid ethane using a Leica EM GP. Data  
610 collection was carried out at liquid nitrogen temperature on a Titan Krios microscope (Thermo  
611 Fisher Scientific) operated at an accelerating voltage of 300 kV. Micrograph movies were  
612 collected using EPU software (FEI) on a Gatan K3 detector in counting mode with a pixel size  
613 of 0.67 Å. A total of 3095 movie frames were acquired with a defocus range of approximately  
614 -0.7 to -2.7 µm. Each movie consisted of a movie stack of 30 frames with a total dose of 50  
615 electron/Å<sup>2</sup> over 1.5 seconds with a total dose of ~50 electron/Å<sup>2</sup> at a dose rate of 15  
616 electron/pixel/second.

617

### 618 *Cryo-EM Image Processing, reconstruction and model fitting*

619 The movie stacks were aligned and summed with dose-weighting using MotionCor2 (Zheng  
620 et al., 2017). Contrast transfer function (CTF) was estimated by CtfFind4 (Rohou and  
621 Grigorieff, 2015), and images with poor CTF estimation were eliminated. A small subset of

622 200 micrographs were used to pick the particles using the blob picker tool in CryoSparc v3.1.0  
623 (Punjani et al., 2017). These particles were 2D classified to generate a template which was  
624 subsequently used for particles picking using the template picket tool in CryoSparc. A total of  
625 1299061 initial particles were picked and subjected to several iterative rounds of 2D  
626 classification, removing particles of poor template classes after each round of classification. A  
627 final set of 73190 good particles were used to generate an *ab-initio* model using a C2  
628 symmetry, as a clear two-fold symmetry was visible from the 2D classes (Fig 2E). Using the  
629 *ab-initio* model, the particles were subjected to 3D homogenous refinement in CryoSparc  
630 which yielded a map at 10.1 Å at 0.5 FSC cut off.

631

632 A poly alanine model of the crystal structures of the DnaD<sup>NTD</sup> (PDB 2V79) and the DnaD<sup>CTD</sup>  
633 (PDB 2ZC2) were used to dock into the cryo-EM map of DnaD. The C-terminal domain can  
634 be readily identified and was docked into the density using Chimera (Pettersen et al., 2004).  
635 The entire N-terminal domain could not be readily docked in to the cryo-EM density hence a  
636 flexible fitting approach was adopted. The  $\beta$ -hairpin density could be easily identified within  
637 the map which was docked in the density first. The remainder of the structure was manually  
638 fitted in the density using Coot (Emsley and Cowtan, 2004). A single round of real space  
639 refinement was performed to remove any clashes and idealize the model using Phenix  
640 (Liebschner et al., 2019).

641

642 **ACKNOWLEDGEMENTS**

643 SEC-MALLS experiments were performed by Dr. Andrew Leech at the Molecular Interaction  
644 laboratory as a service from the University of York. Research support was provided to HM by  
645 a Wellcome Trust Senior Research Fellowship (204985/Z/16/Z) and a grant from the  
646 Biotechnology and Biological Sciences Research Council (BB/P018432/1). Research  
647 support was provided to PS by a grant from the Biotechnology and Biological Sciences  
648 Research Council (BB/R013357/1). DS was supported by a Research Excellence Academy  
649 Studentship from the Faculty of Medical Sciences at Newcastle University. EM was  
650 supported by Erasmus+.

651

652

653 **AUTHOR CONTRIBUTIONS**

654 CW, DS, SF, SP, EM, NBC, PS, TRDC, AI, HM contributed to the conception/design of the  
655 work. CW, DS, SF, SP, NBC, AI, HM generated results presented in the manuscript. NBC  
656 collected the cryo-EM data, TRDC and AI processed the cryo-EM data. CW, DS, SF, SP, AI  
657 created Figures. HM, CW, AI wrote the manuscript. HM, CW, DS, SF, SP, PS, AI edited the  
658 manuscript.

659

660

661 **CONFLICT OF INTEREST**

662 Authors declare that they do not have any conflicts of interest.



663 **REFERENCES**

- 664 Abe, Y., Jo, T., Matsuda, Y., Matsunaga, C., Katayama, T., and Ueda, T. (2007). Structure  
665 and function of DnaA N-terminal domains: specific sites and mechanisms in inter-DnaA  
666 interaction and in DnaB helicase loading on oriC. *The Journal of biological chemistry* *282*,  
667 17816-17827.
- 668 Andrup, L., Atlung, T., Ogasawara, N., Yoshikawa, H., and Hansen, F.G. (1988). Interaction  
669 of the *Bacillus subtilis* DnaA-like protein with the *Escherichia coli* DnaA protein. *Journal of*  
670 *bacteriology* *170*, 1333-1338.
- 671 Bell, S.P., and Kaguni, J.M. (2013). Helicase loading at chromosomal origins of replication.  
672 *Cold Spring Harb Perspect Biol* *5*.
- 673 Bleichert, F., Botchan, M.R., and Berger, J.M. (2017). Mechanisms for initiating cellular DNA  
674 replication. *Science (New York, N.Y)* *355*, eaah6317.
- 675 Boonstra, M., de Jong, I.G., Scholefield, G., Murray, H., Kuipers, O.P., and Veening, J.W.  
676 (2013). Spo0A regulates chromosome copy number during sporulation by directly binding to  
677 the origin of replication in *Bacillus subtilis*. *Mol Microbiol* *87*, 925-938.
- 678 Briggs, G.S., Smits, W.K., and Soutanas, P. (2012). Chromosomal replication initiation  
679 machinery of low-G+C-content Firmicutes. *Journal of bacteriology* *194*, 5162-5170.
- 680 Bruand, C., Ehrlich, S.D., and Janniere, L. (1995). Primosome assembly site in *Bacillus*  
681 *subtilis*. *The EMBO journal* *14*, 2642-2650.
- 682 Bruand, C., Velten, M., McGovern, S., Marsin, S., Serena, C., Ehrlich, S.D., and Polard, P.  
683 (2005). Functional interplay between the *Bacillus subtilis* DnaD and DnaB proteins essential  
684 for initiation and re-initiation of DNA replication. *Mol Microbiol* *55*, 1138-1150.
- 685 Carneiro, M.J., Zhang, W., Ioannou, C., Scott, D.J., Allen, S., Roberts, C.J., and Soutanas,  
686 P. (2006). The DNA-remodelling activity of DnaD is the sum of oligomerization and DNA-  
687 binding activities on separate domains. *Mol Microbiol* *60*, 917-924.
- 688 Chaudhuri, R.R., Allen, A.G., Owen, P.J., Shalom, G., Stone, K., Harrison, M., Burgis, T.A.,  
689 Lockyer, M., Garcia-Lara, J., Foster, S.J., *et al.* (2009). Comprehensive identification of  
690 essential *Staphylococcus aureus* genes using Transposon-Mediated Differential  
691 Hybridisation (TMDH). *BMC Genomics* *10*, 291.
- 692 Chodavarapu, S., Felczak, M.M., Yaniv, J.R., and Kaguni, J.M. (2008a). *Escherichia coli*  
693 DnaA interacts with HU in initiation at the *E. coli* replication origin. *Mol. Microbiol.* *67*, 781-  
694 792.
- 695 Chodavarapu, S., Gomez, R., Vicente, M., and Kaguni, J.M. (2008b). *Escherichia coli* Dps  
696 interacts with DnaA protein to impede initiation: a model of adaptive mutation. *Mol Microbiol*  
697 *67*, 1331-1346.
- 698 Collier, C., Machon, C., Briggs, G.S., Smits, W.K., and Soutanas, P. (2012). Untwisting of  
699 the DNA helix stimulates the endonuclease activity of *Bacillus subtilis* Nth at AP sites.  
700 *Nucleic acids research* *40*, 739-750.
- 701 Coster, G., and Diffley, J.F.X. (2017). Bidirectional eukaryotic DNA replication is established  
702 by quasi-symmetrical helicase loading. *Science (New York, N.Y)* *357*, 314-318.
- 703 Duderstadt, K.E., Chuang, K., and Berger, J.M. (2011). DNA stretching by bacterial initiators  
704 promotes replication origin opening. *Nature* *478*, 209-213.
- 705 Emsley, P., and Cowtan, K. (2004). Coot: model-building tools for molecular graphics. *Acta*  
706 *Crystallogr D Biol Crystallogr* *60*, 2126-2132.
- 707 Errington, J. (2003). Regulation of endospore formation in *Bacillus subtilis*. *Nature Reviews*  
708 *Microbiology* *1*, 117-126.
- 709 Erzberger, J.P., Mott, M.L., and Berger, J.M. (2006). Structural basis for ATP-dependent  
710 DnaA assembly and replication-origin remodeling. *Nature structural & molecular biology* *13*,  
711 676-683.
- 712 Erzberger, J.P., Pirruccello, M.M., and Berger, J.M. (2002). The structure of bacterial DnaA:  
713 implications for general mechanisms underlying DNA replication initiation. *EMBO J.* *21*,  
714 4763-4773.

- 715 Fang, L., Davey, M.J., and O'Donnell, M. (1999). Replisome assembly at oriC, the replication  
716 origin of *E. coli*, reveals an explanation for initiation sites outside an origin. *Molecular cell* 4,  
717 541-553.
- 718 Fawcett, P., Eichenberger, P., Losick, R., and Youngman, P. (2000). The transcriptional  
719 profile of early to middle sporulation in *Bacillus subtilis*. *Proceedings of the National*  
720 *Academy of Sciences of the United States of America* 97, 8063-8068.
- 721 Fisher, G.L., Pastrana, C.L., Higman, V.A., Koh, A., Taylor, J.A., Butterer, A., Craggs, T.,  
722 Sobott, F., Murray, H., Crump, M.P., *et al.* (2017). The structural basis for dynamic DNA  
723 binding and bridging interactions which condense the bacterial centromere. *Elife* 6.
- 724 Fujikawa, N., Kurumizaka, H., Nureki, O., Terada, T., Shirouzu, M., Katayama, T., and  
725 Yokoyama, S. (2003). Structural basis of replication origin recognition by the DnaA protein.  
726 *Nucleic Acids Res.* 31, 2077-2086.
- 727 Fuller, R.S., Funnell, B.E., and Kornberg, A. (1984). The dnaA protein complex with the *E.*  
728 *coli* chromosomal replication origin (*oriC*) and other DNA sites. *Cell* 38, 889-900.
- 729 Hagel, L. (2001). Gel-filtration chromatography. *Curr Protoc Mol Biol Chapter 10*, Unit 10 19.
- 730 Hassan, A.K., Moriya, S., Ogura, M., Tanaka, T., Kawamura, F., and Ogasawara, N. (1997).  
731 Suppression of initiation defects of chromosome replication in *Bacillus subtilis* *dnaA* and  
732 *oriC*-deleted mutants by integration of a plasmid replicon into the chromosomes. *Journal of*  
733 *bacteriology* 179, 2494-2502.
- 734 Hood, I.V., and Berger, J.M. (2016). Viral hijacking of a replicative helicase loader and its  
735 implications for helicase loading control and phage replication. *Elife* 5.
- 736 Huang, Y.H., Lien, Y., Huang, C.C., and Huang, C.Y. (2016). Characterization of  
737 *Staphylococcus aureus* Primosomal DnaD Protein: Highly Conserved C-Terminal Region Is  
738 Crucial for ssDNA and PriA Helicase Binding but Not for DnaA Protein-Binding and Self-  
739 Tetramerization. *PloS one* 11, e0157593.
- 740 Imai, Y., Ogasawara, N., Ishigo-Oka, D., Kadoya, R., Daito, T., and Moriya, S. (2000).  
741 Subcellular localization of Dna-initiation proteins of *Bacillus subtilis*: evidence that  
742 chromosome replication begins at either edge of the nucleoids. *Mol Microbiol* 36, 1037-1048.
- 743 Ishikawa, S., Ogura, Y., Yoshimura, M., Okumura, H., Cho, E., Kawai, Y., Kurokawa, K.,  
744 Oshima, T., and Ogasawara, N. (2007). Distribution of stable DnaA-binding sites on the  
745 *Bacillus subtilis* genome detected using a modified ChIP-chip method. *DNA Res* 14, 155-  
746 168.
- 747 Jameson, K.H., Rostami, N., Fogg, M.J., Turkenburg, J.P., Grahl, A., Murray, H., and  
748 Wilkinson, A.J. (2014). Structure and interactions of the *Bacillus subtilis* sporulation inhibitor  
749 of DNA replication, SirA, with domain I of DnaA. *Mol Microbiol* 93, 975-991.
- 750 Jaworski, P., Zyla-Uklejewicz, D., Nowaczyk-Cieszewska, M., Donczew, R., Mielke, T.,  
751 Weigel, C., and Zawilak-Pawlik, A. (2021). Putative Cooperative ATP-DnaA Binding to  
752 Double-Stranded DnaA Box and Single-Stranded DnaA-Trio Motif upon *Helicobacter pylori*  
753 Replication Initiation Complex Assembly. *International journal of molecular sciences* 22.
- 754 Kaguni, J.M. (2018). The Macromolecular Machines that Duplicate the *Escherichia coli*  
755 Chromosome as Targets for Drug Discovery. *Antibiotics (Basel)* 7.
- 756 Karimova, G., Pidoux, J., Ullmann, A., and Ladant, D. (1998). A bacterial two-hybrid system  
757 based on a reconstituted signal transduction pathway. *Proc Natl Acad Sci U S A* 95, 5752-  
758 5756.
- 759 Keyamura, K., Abe, Y., Higashi, M., Ueda, T., and Katayama, T. (2009). DiaA dynamics are  
760 coupled with changes in initial origin complexes leading to helicase loading. *The Journal of*  
761 *biological chemistry* 284, 25038-25050.
- 762 Keyamura, K., Fujikawa, N., Ishida, T., Ozaki, S., Su'etsugu, M., Fujimitsu, K., Kagawa, W.,  
763 Yokoyama, S., Kurumizaka, H., and Katayama, T. (2007). The interaction of DiaA and DnaA  
764 regulates the replication cycle in *E. coli* by directly promoting ATP DnaA-specific initiation  
765 complexes. *Genes & development* 21, 2083-2099.
- 766 Kimura, T., Amaya, Y., Kobayashi, K., Ogasawara, N., and Sato, T. (2010). Repression of  
767 sigK intervening (skin) element gene expression by the CI-like protein SknR and effect of  
768 SknR depletion on growth of *Bacillus subtilis* cells. *Journal of bacteriology* 192, 6209-6216.

- 769 Klein, A., Lanka, E., and Schuster, H. (1980). Isolation of a complex between the P protein of  
770 phage lambda and the dnaB protein of *Escherichia coli*. *Eur J Biochem* *105*, 1-6.
- 771 Kobayashi, K., Ehrlich, S.D., Albertini, A., Amati, G., Andersen, K.K., Arnaud, M., Asai, K.,  
772 Ashikaga, S., Aymerich, S., Bessieres, P., *et al.* (2003). Essential *Bacillus subtilis* genes.  
773 *Proc Natl Acad Sci U S A* *100*, 4678-4683.
- 774 Kogoma, T., and von Meyenburg, K. (1983). The origin of replication, oriC, and the dnaA  
775 protein are dispensable in stable DNA replication (sdrA) mutants of *Escherichia coli* K-12.  
776 *The EMBO journal* *2*, 463-468.
- 777 Kohler, P., and Marahiel, M.A. (1997). Association of the histone-like protein HBsu with the  
778 nucleoid of *Bacillus subtilis*. *Journal of bacteriology* *179*, 2060-2064.
- 779 Kowalski, D., and Eddy, M.J. (1989). The DNA unwinding element: a novel, cis-acting  
780 component that facilitates opening of the *Escherichia coli* replication origin. *EMBO J.* *8*,  
781 4335-4344.
- 782 Krause, M., and Messer, W. (1999). DnaA proteins of *Escherichia coli* and *Bacillus subtilis*:  
783 coordinate actions with single-stranded DNA-binding protein and interspecies inhibition  
784 during open complex formation at the replication origins. *Gene* *228*, 123-132.
- 785 Krause, M., Ruckert, B., Lurz, R., and Messer, W. (1997). Complexes at the replication origin  
786 of *Bacillus subtilis* with homologous and heterologous DnaA protein. *J. Mol. Biol.* *274*, 365-  
787 380.
- 788 Liebschner, D., Afonine, P.V., Baker, M.L., Bunkoczi, G., Chen, V.B., Croll, T.I., Hintze, B.,  
789 Hung, L.W., Jain, S., McCoy, A.J., *et al.* (2019). Macromolecular structure determination  
790 using X-rays, neutrons and electrons: recent developments in Phenix. *Acta Crystallogr D*  
791 *Struct Biol* *75*, 861-877.
- 792 Liu, X., Gallay, C., Kjos, M., Domenech, A., Slager, J., van Kessel, S.P., Knoop, K., Sorg,  
793 R.A., Zhang, J.R., and Veening, J.W. (2017). High-throughput CRISPRi phenotyping  
794 identifies new essential genes in *Streptococcus pneumoniae*. *Mol Syst Biol* *13*, 931.
- 795 Marston, F.Y., Grainger, W.H., Smits, W.K., Hopcroft, N.H., Green, M., Hounslow, A.M.,  
796 Grossman, A.D., Craven, C.J., and Soultanas, P. (2010). When simple sequence  
797 comparison fails: the cryptic case of the shared domains of the bacterial replication initiation  
798 proteins DnaB and DnaD. *Nucleic acids research* *38*, 6930-6942.
- 799 Martin, E., Williams, H.E.L., Pitoulias, M., Stevens, D., Winterhalter, C., Craggs, T.D.,  
800 Murray, H., Searle, M.S., and Soultanas, P. (2019). DNA replication initiation in *Bacillus*  
801 *subtilis*: structural and functional characterization of the essential DnaA-DnaD interaction.  
802 *Nucleic Acids Res.* *47*, 2101-2112.
- 803 Matthews, L.A., and Simmons, L.A. (2018). Cryptic protein interactions regulate DNA  
804 replication initiation. *Mol. Microbiol.* *111*, 118-130.
- 805 Messer, W., Blaesing, F., Majka, J., Nardmann, J., Schaper, S., Schmidt, A., Seitz, H.,  
806 Speck, C., Tungler, D., Wegrzyn, G., *et al.* (1999). Functional domains of DnaA proteins.  
807 *Biochimie* *81*, 819-825.
- 808 Miller, T.C.R., Locke, J., Greiwe, J.F., Diffley, J.F.X., and Costa, A. (2019). Mechanism of  
809 head-to-head MCM double-hexamer formation revealed by cryo-EM. *Nature* *575*, 704-710.
- 810 Moerke, N.J. (2009). Fluorescence Polarization (FP) Assays for Monitoring Peptide-Protein  
811 or Nucleic Acid-Protein Binding. *Curr Protoc Chem Biol* *1*, 1-15.
- 812 Mott, M.L., Erzberger, J.P., Coons, M.M., and Berger, J.M. (2008). Structural synergy and  
813 molecular crosstalk between bacterial helicase loaders and replication initiators. *Cell* *135*,  
814 623-634.
- 815 Natrajan, G., Noirot-Gros, M.F., Zawilak-Pawlik, A., Kapp, U., and Terradot, L. (2009). The  
816 structure of a DnaA/HobA complex from *Helicobacter pylori* provides insight into regulation  
817 of DNA replication in bacteria. *Proc. Natl. Acad. Sci. USA* *106*, 21115-21120.
- 818 Noguchi, Y., and Katayama, T. (2016). The *Escherichia coli* Cryptic Prophage Protein YfdR  
819 Binds to DnaA and Initiation of Chromosomal Replication Is Inhibited by Overexpression of  
820 the Gene Cluster yfdQ-yfdR-yfdS-yfdT. *Front Microbiol* *7*, 239.
- 821 Odegrip, R., Schoen, S., Haggard-Ljungquist, E., Park, K., and Chatteraj, D.K. (2000). The  
822 interaction of bacteriophage P2 B protein with *Escherichia coli* DnaB helicase. *J Virol* *74*,  
823 4057-4063.

824 Ozaki, S., Kawakami, H., Nakamura, K., Fujikawa, N., Kagawa, W., Park, S.Y., Yokoyama,  
825 S., Kurumizaka, H., and Katayama, T. (2008). A common mechanism for the ATP-DnaA-  
826 dependent formation of open complexes at the replication origin. *J. Biol. Chem.* 283, 8351-  
827 8362.

828 Pellicciari, S., Dong, M.J., Gao, F., and Murray, H. (2021). Evidence for a chromosome origin  
829 unwinding system broadly conserved in bacteria. *Nucleic acids research* 49, 7525-7536.

830 Pettersen, E.F., Goddard, T.D., Huang, C.C., Couch, G.S., Greenblatt, D.M., Meng, E.C.,  
831 and Ferrin, T.E. (2004). UCSF Chimera--a visualization system for exploratory research and  
832 analysis. *J Comput Chem* 25, 1605-1612.

833 Punjani, A., Rubinstein, J.L., Fleet, D.J., and Brubaker, M.A. (2017). cryoSPARC: algorithms  
834 for rapid unsupervised cryo-EM structure determination. *Nat Methods* 14, 290-296.

835 Rahn-Lee, L., Gorbatyuk, B., Skovgaard, O., and Losick, R. (2009). The conserved  
836 sporulation protein YneE inhibits DNA replication in *Bacillus subtilis*. *Journal of bacteriology*  
837 191, 3736-3739.

838 Rahn-Lee, L., Merrikh, H., Grossman, A.D., and Losick, R. (2011). The sporulation protein  
839 SirA inhibits the binding of DnaA to the origin of replication by contacting a patch of clustered  
840 amino acids. *Journal of bacteriology* 193, 1302-1307.

841 Richardson, T.T., Harran, O., and Murray, H. (2016). The bacterial DnaA-trio replication  
842 origin element specifies single-stranded DNA initiator binding. *Nature* 534, 412-416.

843 Richardson, T.T., Stevens, D., Pellicciari, S., Harran, O., Sperlea, T., and Murray, H. (2019).  
844 Identification of a basal system for unwinding a bacterial chromosome origin. *The EMBO*  
845 *journal* 38, e101649.

846 Robinson, A., Causer, R.J., and Dixon, N.E. (2012). Architecture and conservation of the  
847 bacterial DNA replication machinery, an underexploited drug target. *Curr Drug Targets* 13,  
848 352-372.

849 Rohou, A., and Grigorieff, N. (2015). CTFFIND4: Fast and accurate defocus estimation from  
850 electron micrographs. *Journal of structural biology* 192, 216-221.

851 Rokop, M.E., and Grossman, A.D. (2009). Intragenic and extragenic suppressors of  
852 temperature sensitive mutations in the replication initiation genes *dnaD* and *dnaB* of *Bacillus*  
853 *subtilis*. *PLoS one* 4, e6774.

854 Roth, A., and Messer, W. (1995). The DNA binding domain of the initiator protein DnaA.  
855 *EMBO J.* 14, 2106-2111.

856 Schaper, S., and Messer, W. (1997). Prediction of the structure of the replication initiator  
857 protein DnaA. *Proteins* 28, 1-9.

858 Schindelin, J., Arganda-Carreras, I., Frise, E., Kaynig, V., Longair, M., Pietzsch, T.,  
859 Preibisch, S., Rueden, C., Saalfeld, S., Schmid, B., *et al.* (2012). Fiji: an open-source  
860 platform for biological-image analysis. *Nat. Methods* 9, 676-682.

861 Schneider, S., Zhang, W., Soutanas, P., and Paoli, M. (2008). Structure of the N-terminal  
862 oligomerization domain of DnaD reveals a unique tetramerization motif and provides insights  
863 into scaffold formation. *J. Mol. Biol.* 376, 1237-1250.

864 Schumacher, M.A., Tonthat, N.K., Kwong, S.M., Chinnam, N.B., Liu, M.A., Skurray, R.A.,  
865 and Firth, N. (2014). Mechanism of staphylococcal multiresistance plasmid replication origin  
866 assembly by the RepA protein. *Proc Natl Acad Sci U S A* 111, 9121-9126.

867 Seitz, H., Weigel, C., and Messer, W. (2000). The interaction domains of the DnaA and  
868 DnaB replication proteins of *Escherichia coli*. *Mol Microbiol* 37, 1270-1279.

869 Smits, W.K., Goranov, A.I., and Grossman, A.D. (2010). Ordered association of helicase  
870 loader proteins with the *Bacillus subtilis* origin of replication in vivo. *Mol Microbiol* 75, 452-  
871 461.

872 Smits, W.K., Merrikh, H., Bonilla, C.Y., and Grossman, A.D. (2011). Primosomal proteins  
873 DnaD and DnaB are recruited to chromosomal regions bound by DnaA in *Bacillus subtilis*.  
874 *Journal of bacteriology* 193, 640-648.

875 Sutton, M.D., Carr, K.M., Vicente, M., and Kaguni, J.M. (1998). *Escherichia coli* DnaA  
876 protein. The N-terminal domain and loading of DnaB helicase at the *E. coli* chromosomal  
877 origin. *J. Biol. Chem.* 273, 34255-34262.



- 878 Ticau, S., Friedman, L.J., Ivica, N.A., Gelles, J., and Bell, S.P. (2015). Single-molecule  
879 studies of origin licensing reveal mechanisms ensuring bidirectional helicase loading. *Cell*  
880 *161*, 513-525.
- 881 Tinevez, J.Y., Perry, N., Schindelin, J., Hoopes, G.M., Reynolds, G.D., Laplantine, E.,  
882 Bednarek, S.Y., Shorte, S.L., and Eliceiri, K.W. (2017). TrackMate: An open and extensible  
883 platform for single-particle tracking. *Methods* *115*, 80-90.
- 884 van Eijk, E., Wittekoek, B., Kuijper, E.J., and Smits, W.K. (2017). DNA replication proteins as  
885 potential targets for antimicrobials in drug-resistant bacterial pathogens. *J Antimicrob*  
886 *Chemother* *72*, 1275-1284.
- 887 Wagner, J.K., Marquis, K.A., and Rudner, D.Z. (2009). SirA enforces diploidy by inhibiting  
888 the replication initiator DnaA during spore formation in *Bacillus subtilis*. *Mol. Microbiol.* *73*,  
889 963-974.
- 890 Wang, X., Montero Llopis, P., and Rudner, D.Z. (2014). *Bacillus subtilis* chromosome  
891 organization oscillates between two distinct patterns. *Proc Natl Acad Sci U S A*.
- 892 Webb, C.D., Teleman, A., Gordon, S., Straight, A., Belmont, A., Lin, D.C.-H., Grossman,  
893 A.D., Wright, A., and Losick, R. (1997). Bipolar localization of the replication origin regions of  
894 chromosomes in vegetative and sporulating cells of *B. subtilis*. *Cell* *88*, 667-674.
- 895 Weigel, C., Schmidt, A., Seitz, H., Tungler, D., Welzeck, M., and Messer, W. (1999). The N-  
896 terminus promotes oligomerization of the *Escherichia coli* initiator protein DnaA. *Mol.*  
897 *Microbiol.* *34*, 53-66.
- 898 Weigel, C., and Seitz, H. (2002). Strand-specific loading of DnaB helicase by DnaA to a  
899 substrate mimicking unwound oriC. *Mol Microbiol* *46*, 1149-1156.
- 900 Wyatt, P.J. (1993). Light scattering and the absolute characterization of macromolecules.  
901 *Analytica Chimica Acta* *272*, 1-40.
- 902 Zhang, W., Allen, S., Roberts, C.J., and Soutanas, P. (2006). The *Bacillus subtilis*  
903 primosomal protein DnaD untwists supercoiled DNA. *Journal of bacteriology* *188*, 5487-  
904 5493.
- 905 Zhang, W., Carneiro, M.J., Turner, I.J., Allen, S., Roberts, C.J., and Soutanas, P. (2005).  
906 The *Bacillus subtilis* DnaD and DnaB proteins exhibit different DNA remodelling activities.  
907 *Journal of molecular biology* *351*, 66-75.
- 908 Zhang, W., Machon, C., Orta, A., Phillips, N., Roberts, C.J., Allen, S., and Soutanas, P.  
909 (2008). Single-molecule atomic force spectroscopy reveals that DnaD forms scaffolds and  
910 enhances duplex melting. *Journal of molecular biology* *377*, 706-714.
- 911 Zheng, S.Q., Palovcak, E., Armache, J.P., Verba, K.A., Cheng, Y., and Agard, D.A. (2017).  
912 MotionCor2: anisotropic correction of beam-induced motion for improved cryo-electron  
913 microscopy. *Nat Methods* *14*, 331-332.

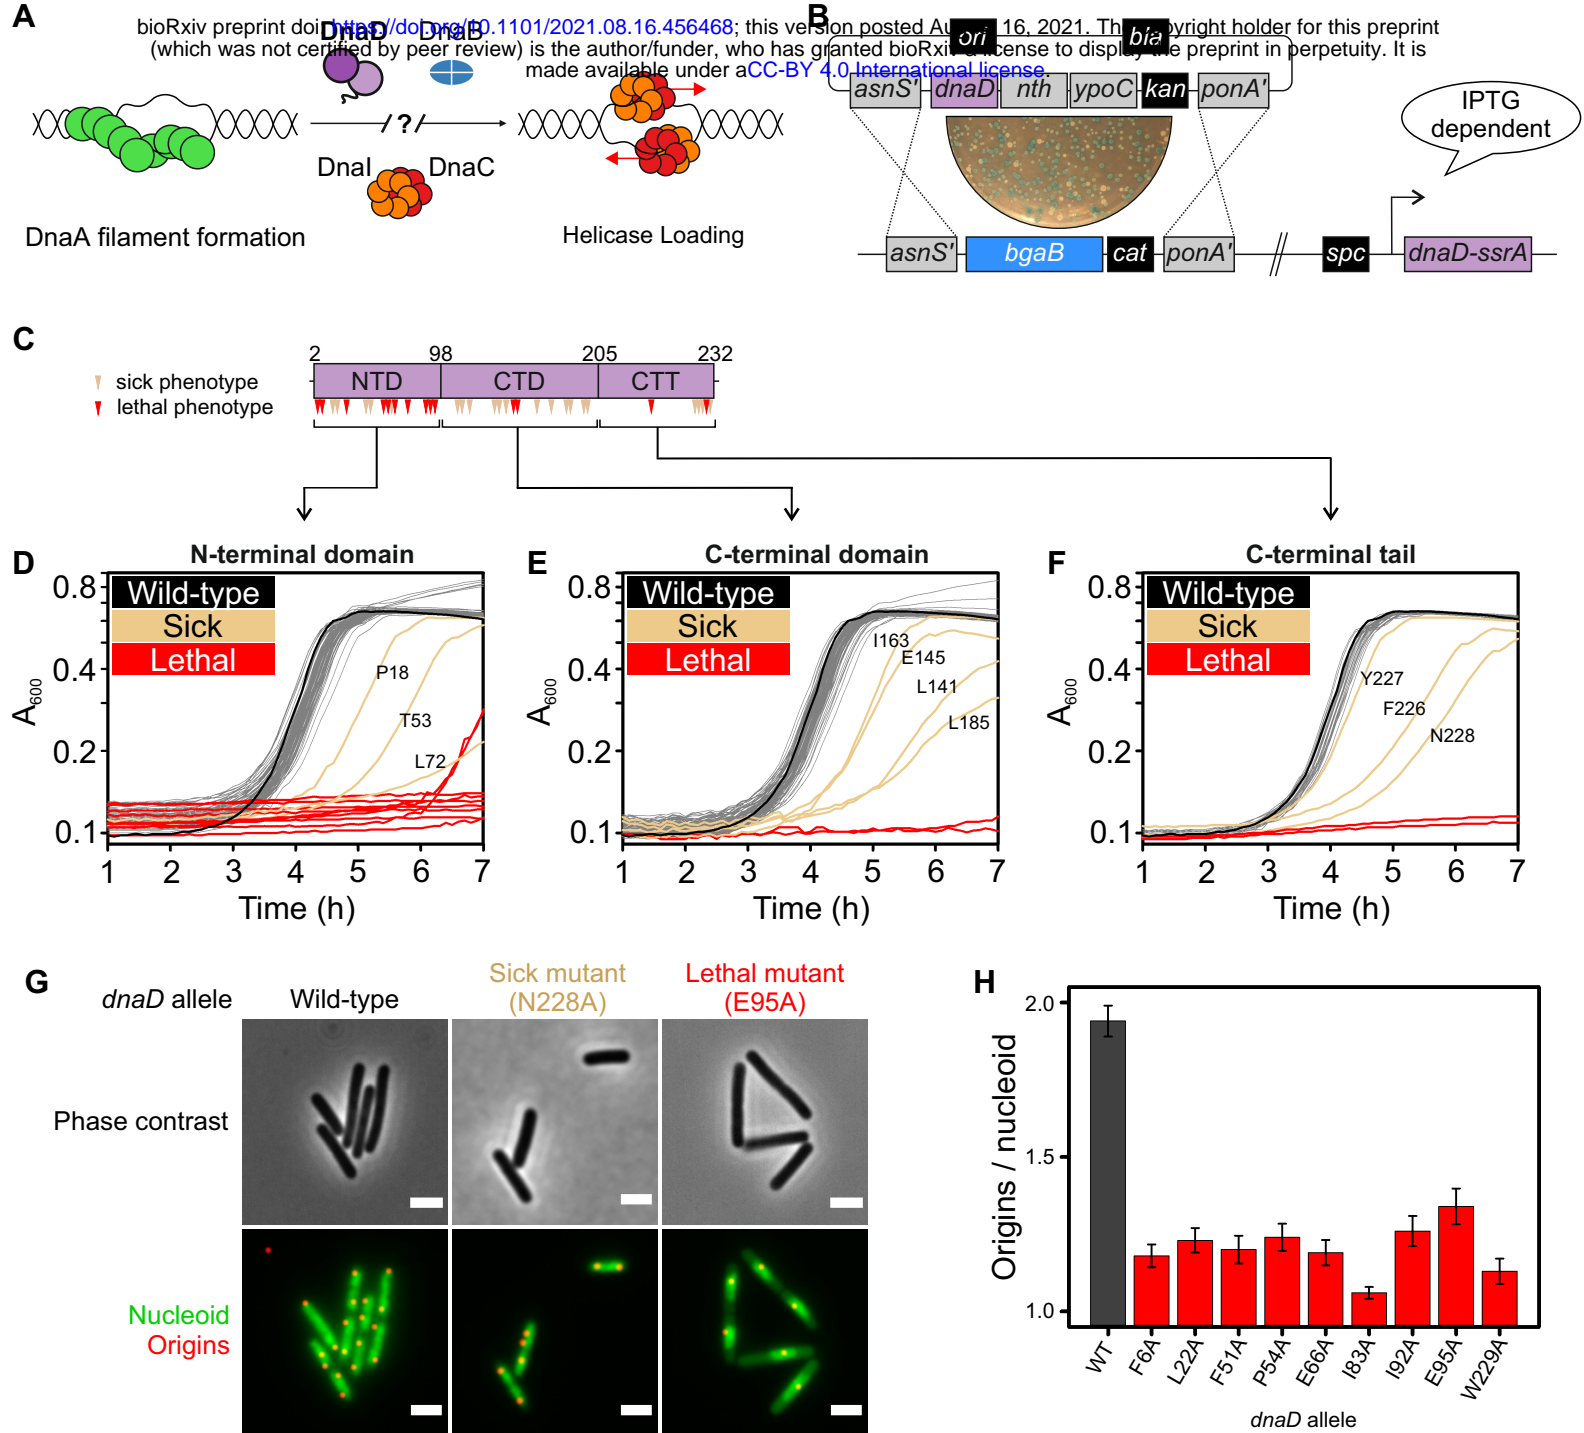

**Figure 1. Identification of essential residues in *B. subtilis* DnaD.** (A) Schematics of the helicase loading pathway in *B. subtilis* showing sequential recruitment of DnaA, DnaD, DnaB and the helicase complex DnaI-DnaC. (B) DnaD blue/white screening assay. An integration vector carrying individual *dnaD* substitutions is integrated by double recombination at the *dnaD* locus, where the native operon has been replaced by a *bgaB* cassette allowing screening in the presence of X-gal. Mutant strains harbour the ectopic inducible *dnaD-ssrA* cassette required for viability during transformation and *dnaD* mutant propagation. (C) DnaD primary structure. Residues marked as red for lethal and beige for altered growth (sporulation defect or slow growth). (D-F) Growth analysis of DnaD variants within the N-terminal domain (D), C-terminal domain (E) or C-terminal tail (F) in the absence of DnaD-SsrA. (G) Microscopy analysis of *dnaD* mutants. The Hbs-GFP signal (green) reveals location of the nucleoid within cells, whereas origins are localized by visualizing TetR-mCherry binding a *tetO* array integrated near *oriC* (red). (H) Origin to nucleoid ratio for all lethal *dnaD* substitutions where the DnaD variant expression was detectable *in vivo*.

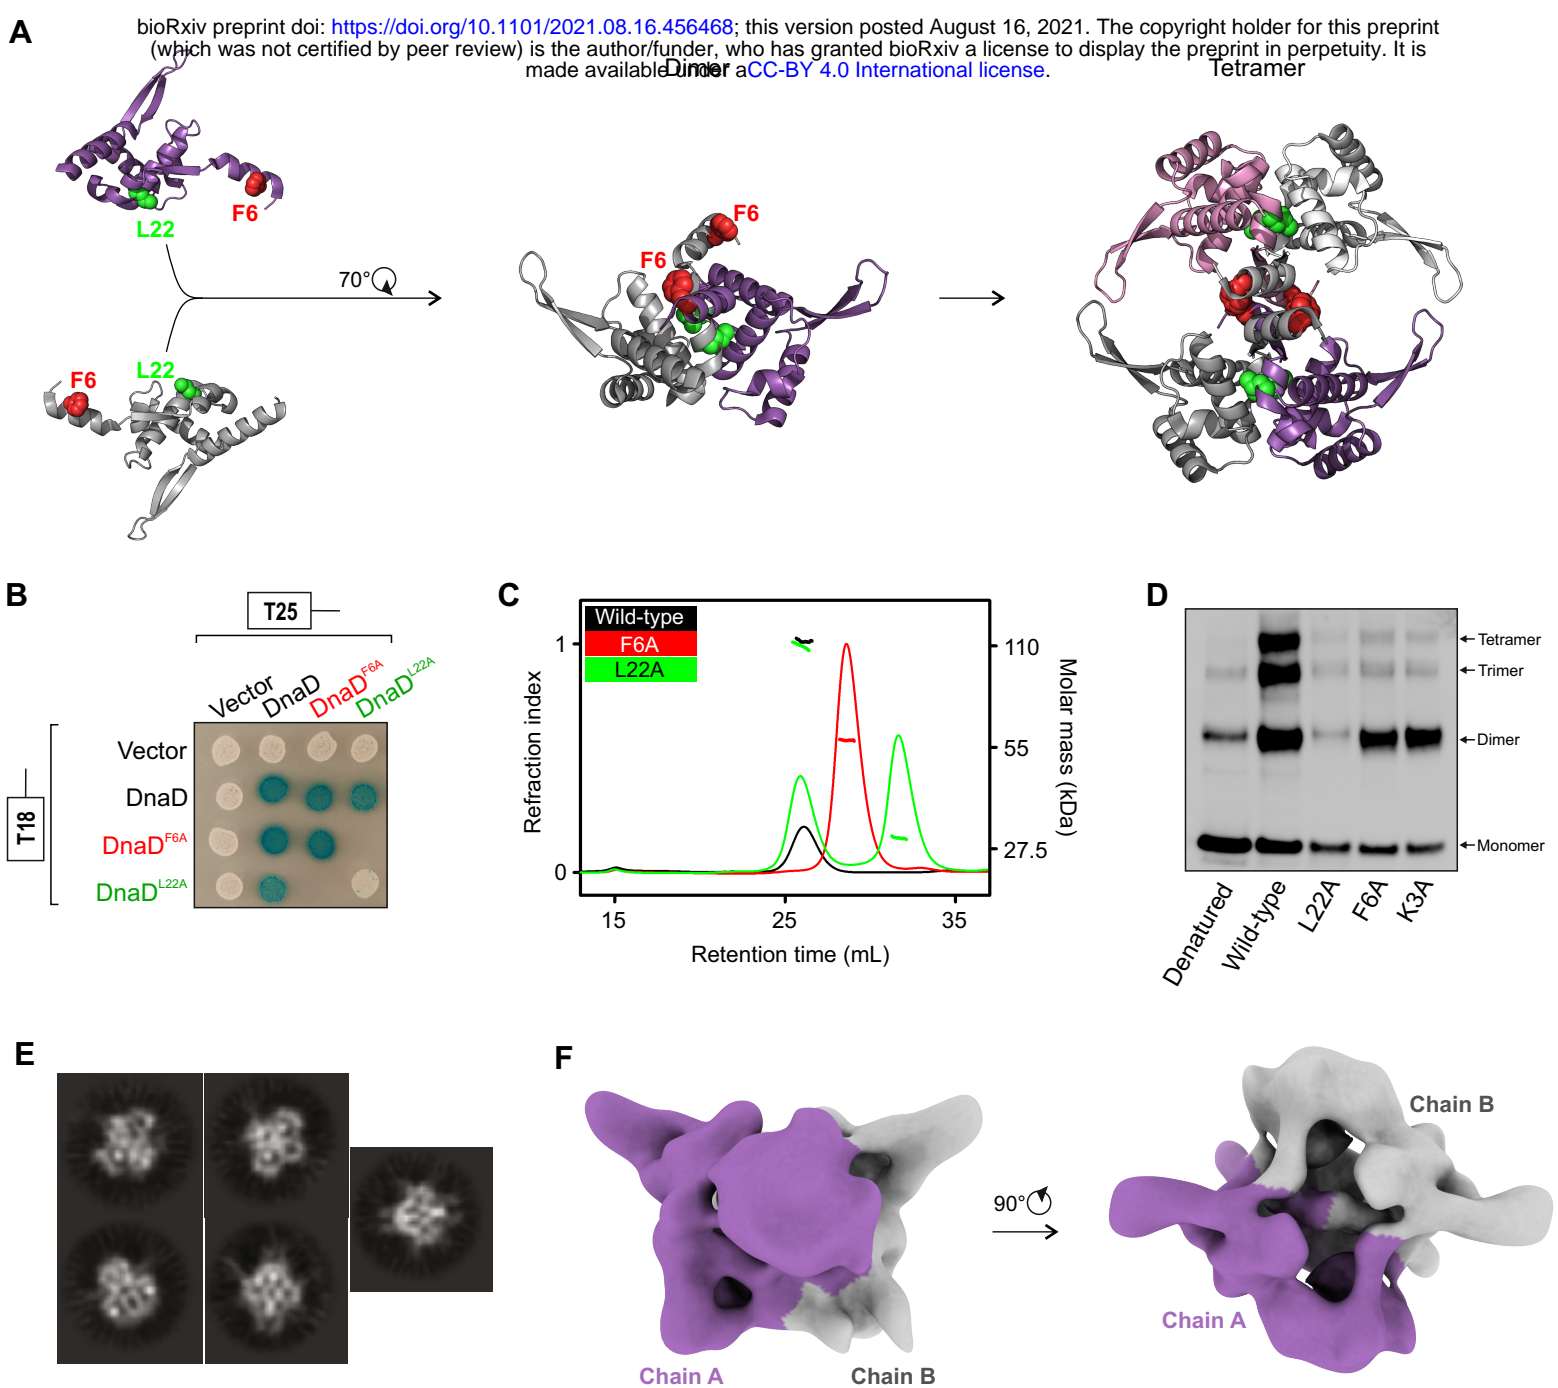

**Figure 2. Lethal alanine substitutions in DnaD disrupt tetramer formation.** (A) Schematics of DnaD N-terminal domain oligomerisation pathway involving key substitutions F6A and L22A. (B) Bacterial two-hybrid assay showing the effect of mutants DnaD<sup>L22A</sup> and DnaD<sup>F6A</sup> on self-interaction. (C) SEC-MALS analysis of DnaD variants. The UV spectrum was normalised as a refraction index and molar mass corresponding to each protein represented as a dots overlapping the peaks. (D) Immunoblot following migration and transfer of BS<sup>3</sup> crosslinked DnaD species using SDS-PAGE. (E) 2D classes observed by cryo-EM. (F) Cryo-EM map of a DnaD dimer.

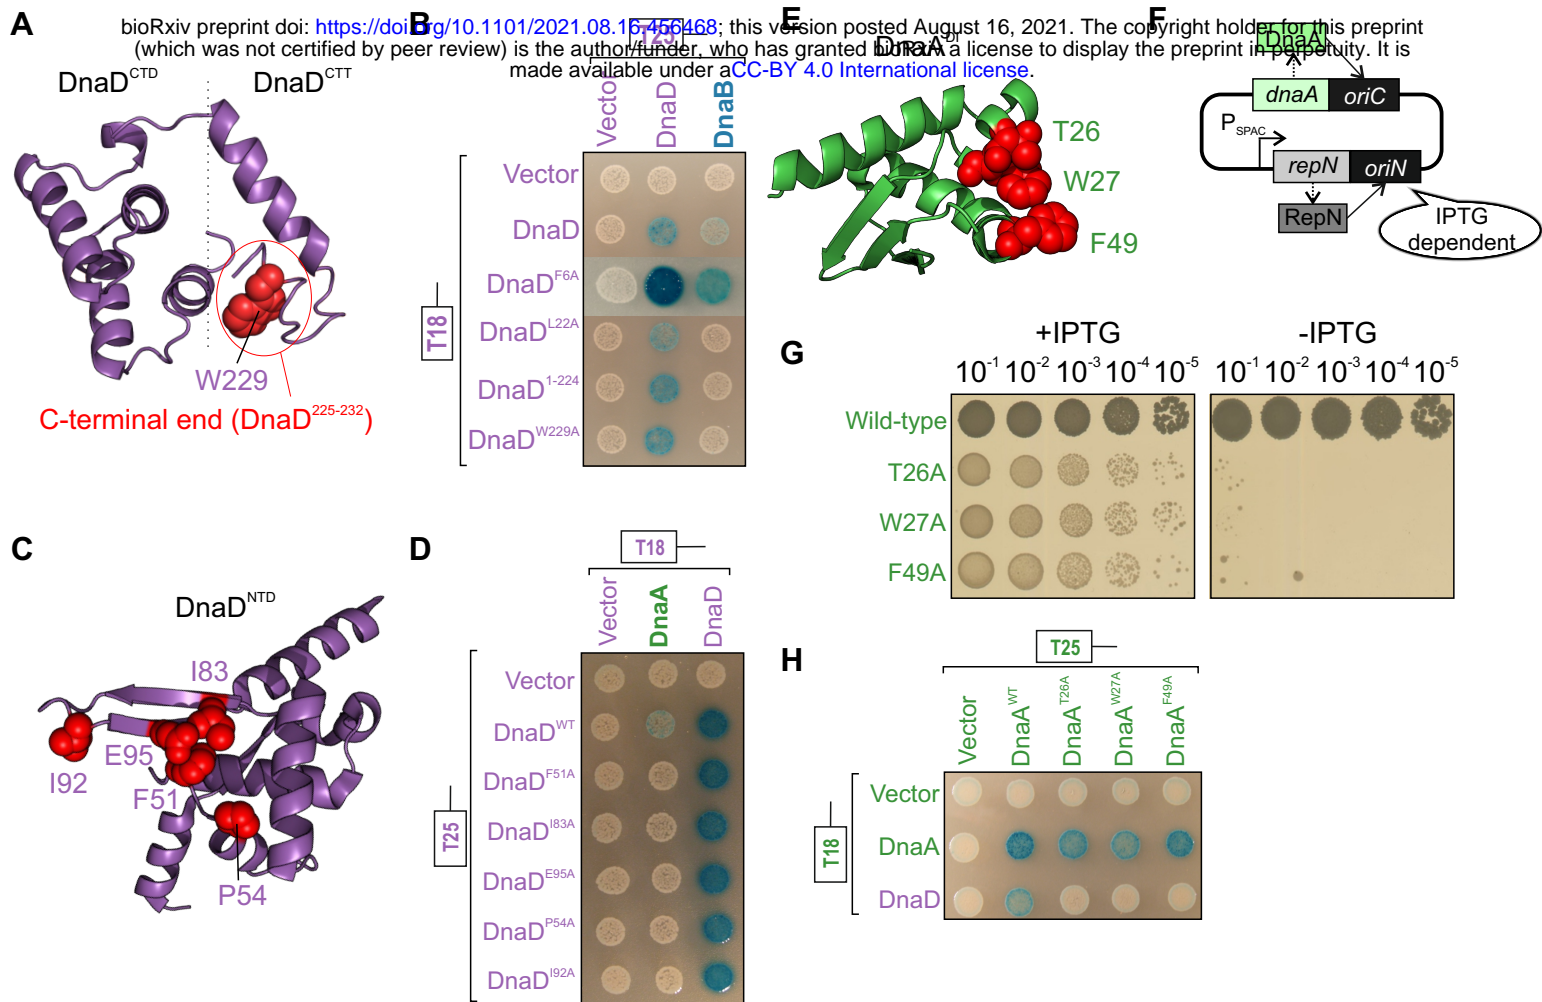

**Figure 3. Lethal alanine substitutions in DnaD disrupt interactions with DnaA and DnaB.** (A) Essential residues of DnaD, required for the interaction with DnaA, mapped onto the DnaD<sup>NTD</sup> crystal structure (PDB 2V79). (B) Bacterial two-hybrid assay showing loss of interaction between DnaD<sup>NTD</sup> variants and DnaA in the context of full-length proteins. (C) Essential residues of DnaD, required for the interaction with DnaB, mapped onto a DnaD<sup>CTD/CTT</sup> model. (D) Bacterial two-hybrid assay showing loss of interaction between DnaD variants and DnaB in the context of full-length proteins. (E) Essential residues of DnaA, required for the interaction with DnaD, mapped onto the DnaA<sup>DI</sup> crystal structure (PDB 4TPS). (F) Schematics of the inducible *repN/oriN* system used to bypass mutations affecting DnaA activity in *B. subtilis*. (G) Spot-titre analysis of DnaA<sup>DI</sup> variants using the inducible *oriN* strain. (H) Bacterial two-hybrid assay showing loss of interaction between DnaA variants and DnaD in the context of full-length proteins.



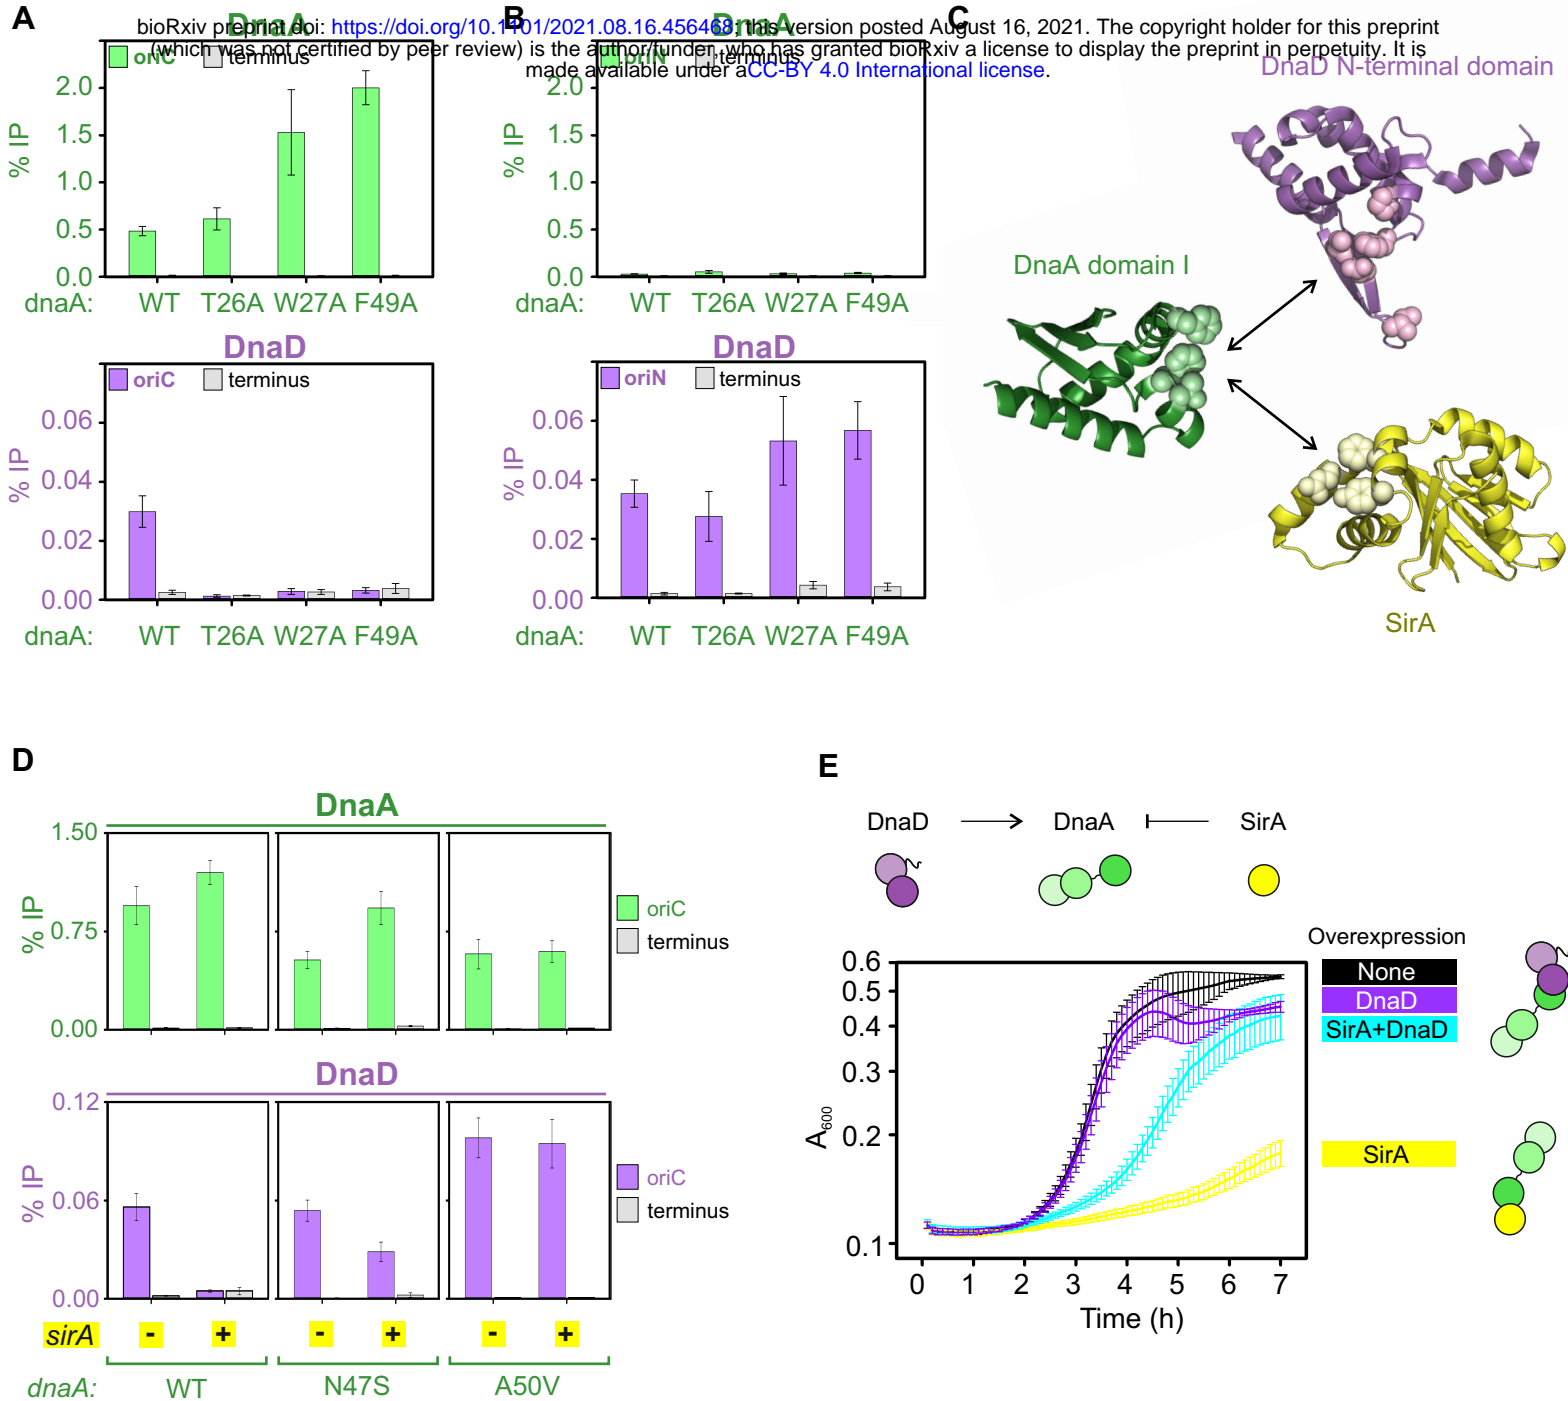

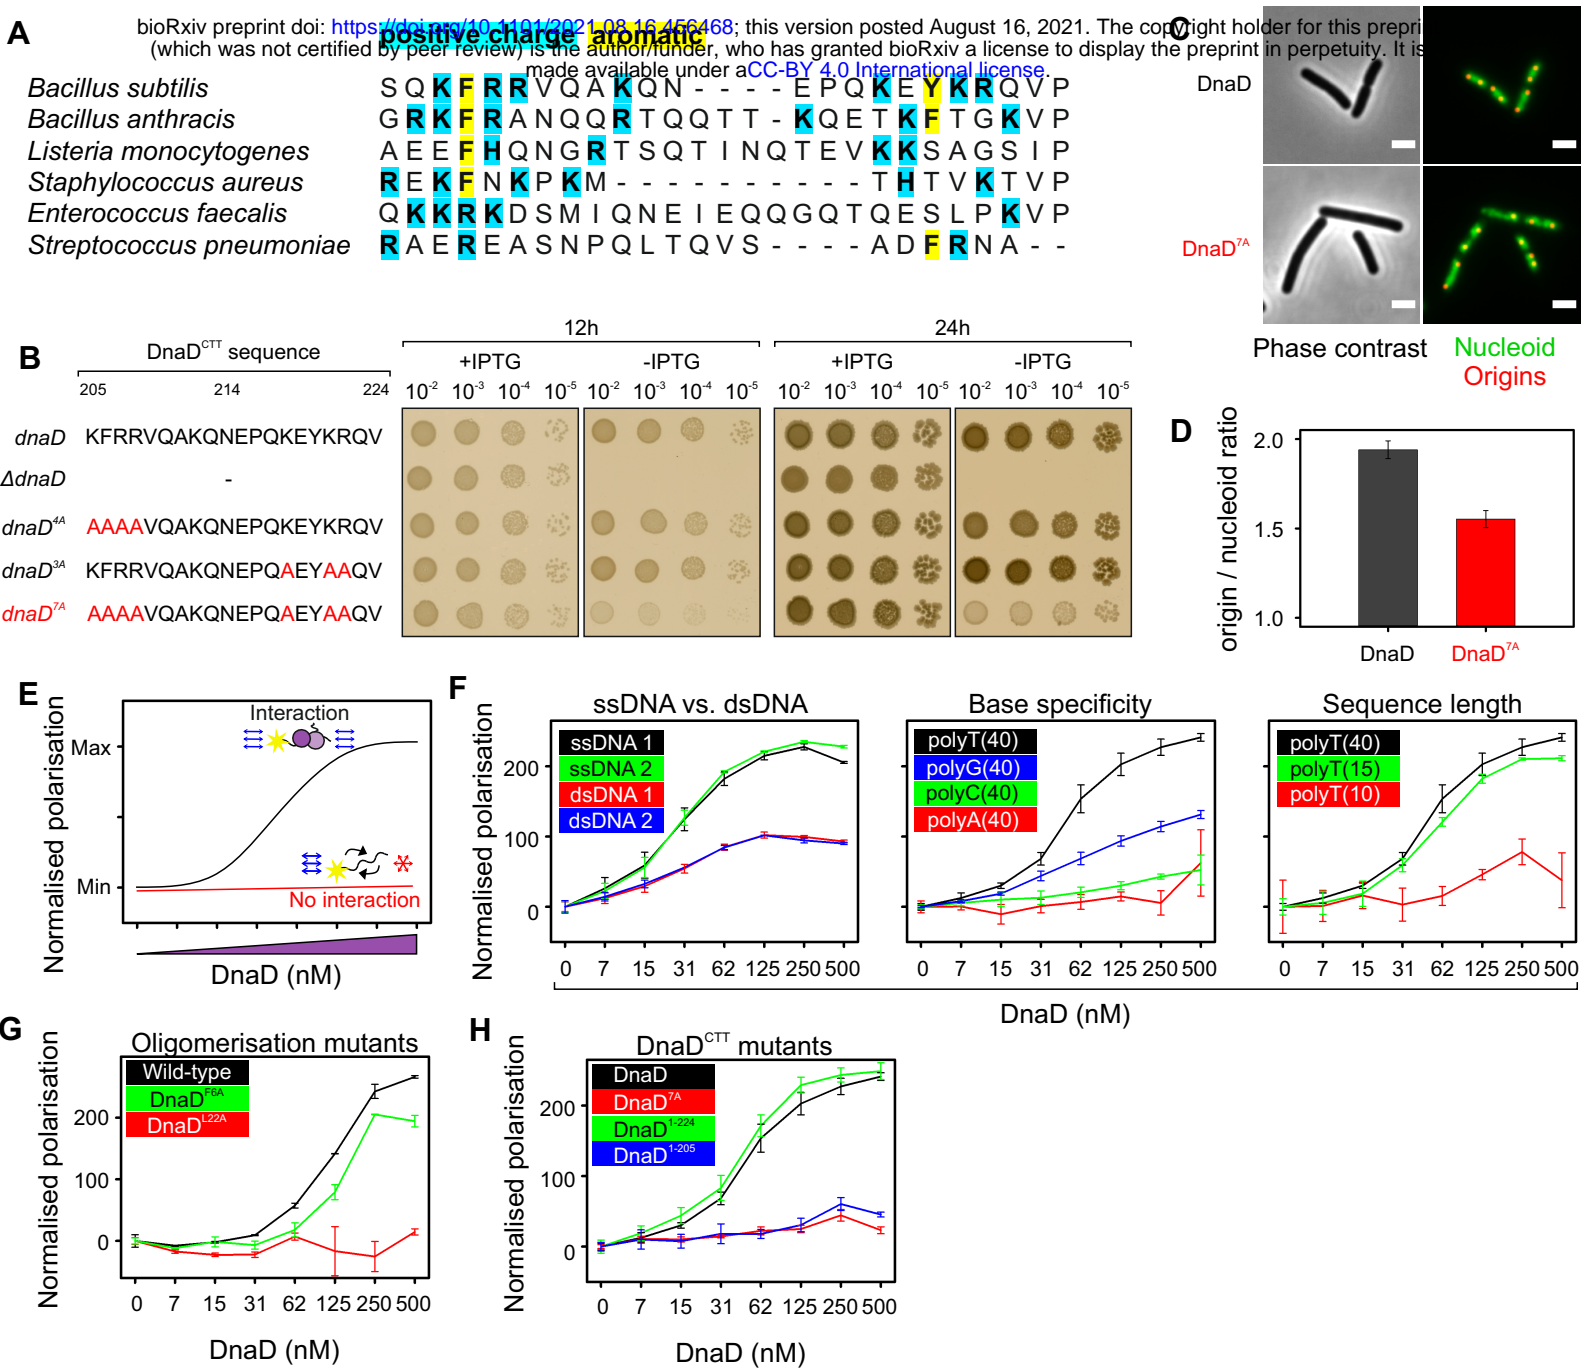

**Figure 5. Alanine substitutions in the DnaD C-terminal tail inhibit DNA replication initiation *in vivo* and ssDNA binding *in vitro*.** (A) Alignment of DnaD homologs showing the recurrence of positively charged and aromatic residues within the DnaD<sup>CTT</sup>. (B) Spot-titre analysis of multiple alanine substitutions in the DnaD<sup>CTT</sup>. (C) Fluorescence microscopy showing altered nucleoid (*hbs-gfp*, green) and origins of the chromosome (*tetR-mCherry* bound to a *tetO* array, red) in the DnaD<sup>7A</sup> mutant. (D) Quantification of origins per nucleoid in the DnaD<sup>7A</sup> strain. (E) Illustration of the fluorescence polarisation assay. (F) Fluorescence polarization analysis of wild-type DnaD binding to a range of DNA substrates. (G) Fluorescence polarization analysis of the oligomerisation mutant DnaD<sup>L22A</sup> (monomer) with ssDNA. (H) Fluorescence polarization analysis of variants within the DnaD<sup>CTT</sup>.

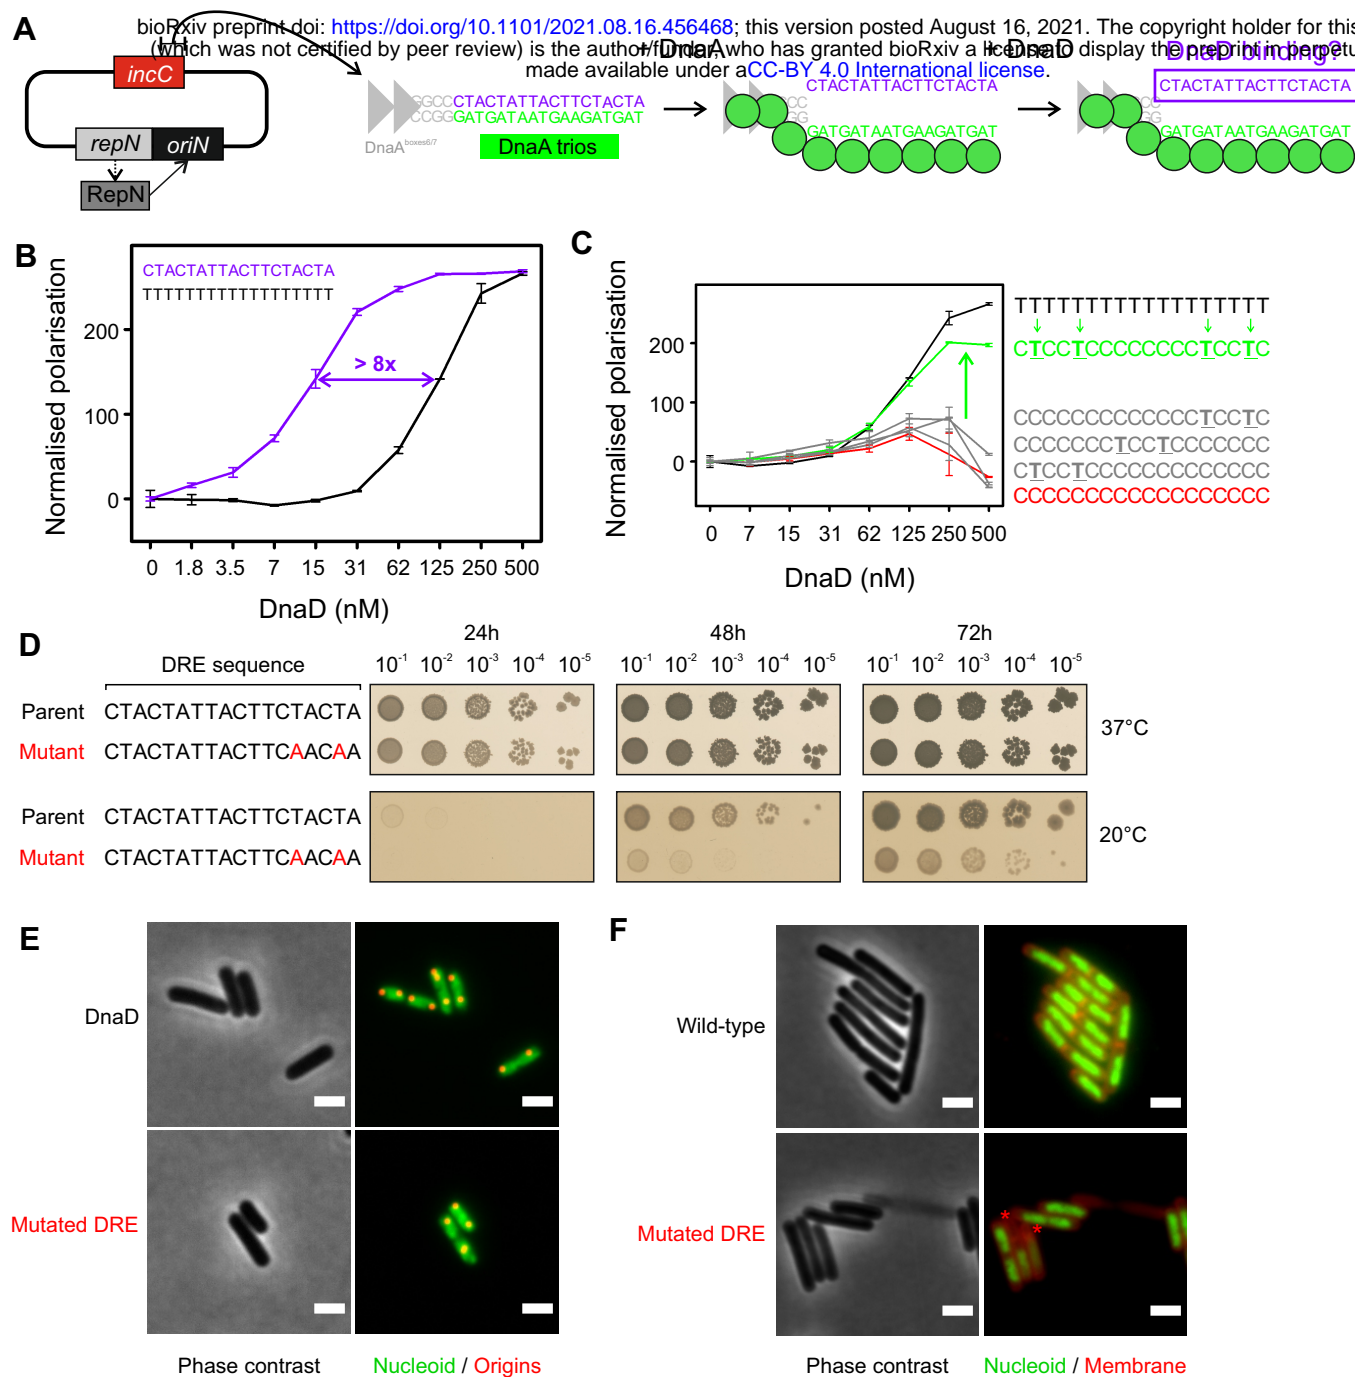

**Figure 6. The DRE promotes specific ssDNA binding activity of DnaD *in vitro* and is required for efficient DNA replication initiation *in vivo*.** (A) Illustration of the proposed basal origin unwinding mechanism involving DnaA oligomer formation on DnaA-trios. (B) Fluorescence polarisation analysis of wild-type DnaD on native and non-native ssDNA substrates. (C) Fluorescence polarisation analysis of wild-type DnaD on non-specific ssDNA backbones containing various 5'-TnnT-3' repeats. (D) Spot titre analysis of the DRE mutant (5'-TnnT-3' to 5'-AnnA-3'). (E) Fluorescence microscopy showing altered nucleoid (Hbs-GFP, green) and origins of the chromosome (TetR-mCherry bound to a *tetO* array, red) in the DRE mutant shown in (D) when cells were grown at 20°C. (F) Fluorescence microscopy of the DRE mutant at 37°C. The nucleoid was labelled with Hbs-GFP (green) and the cell membrane was labelled with Nile Red (red).

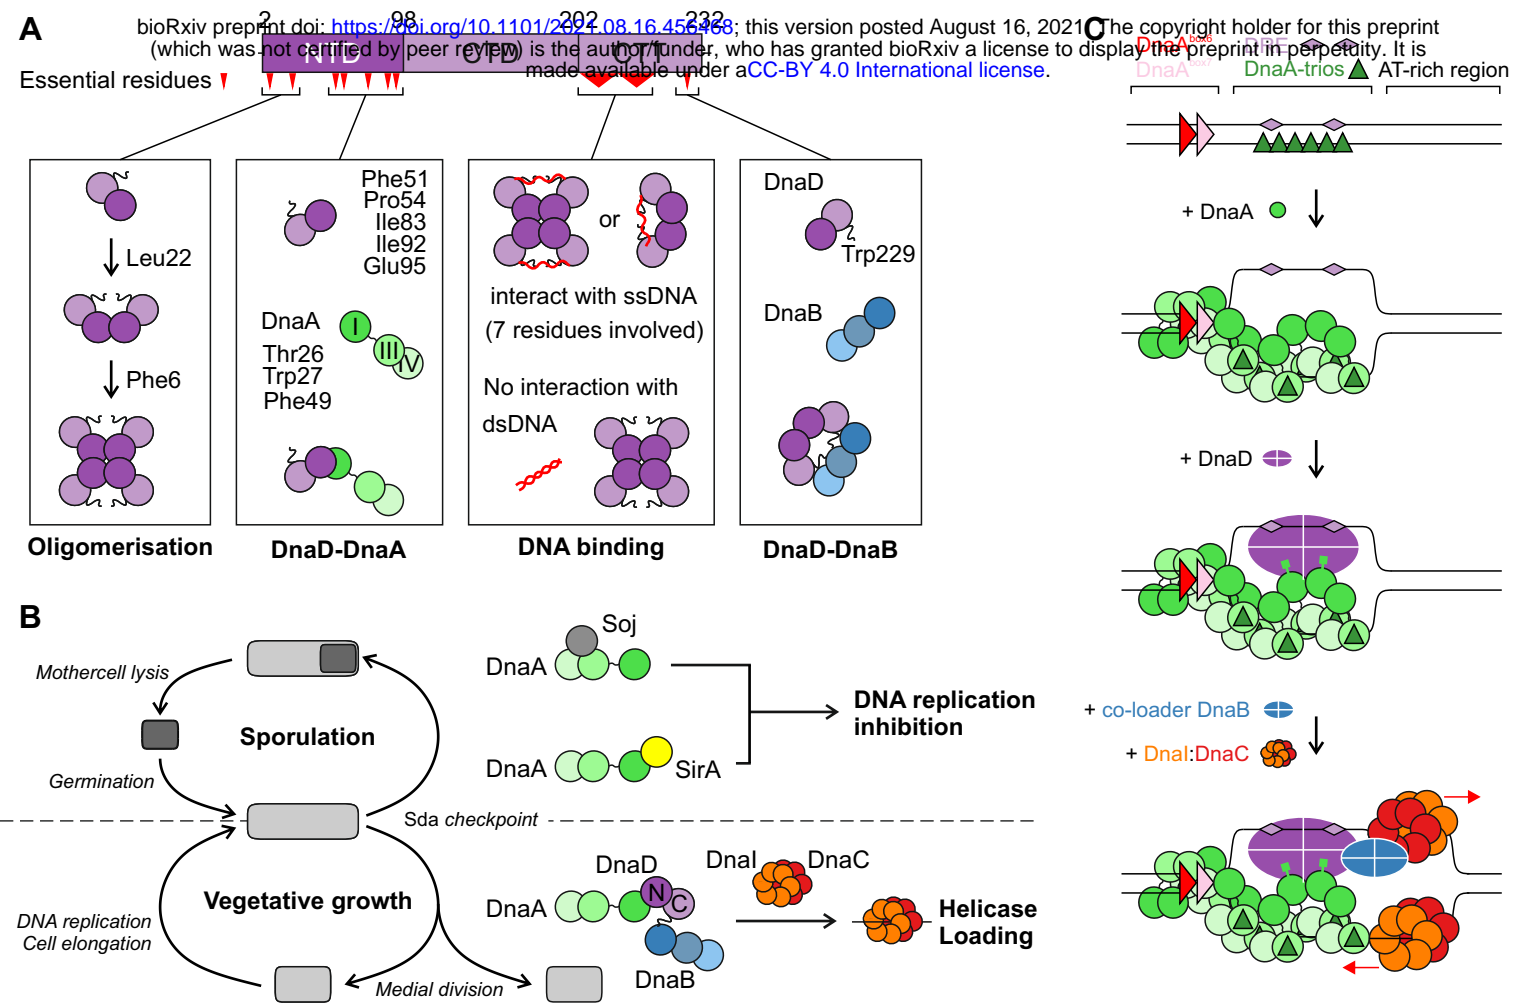

**Figure 7. DnaD activities and interactions during DNA replication initiation at *oriC* culminate with it binding the DRE. (A)** The DnaD functional analysis identified key activities that regulate protein-protein and protein-DNA interactions. **(B)** Regulation of helicase loading by SirA during *B. subtilis* spore development. **(C)** Model of chromosomal replication initiation in *B. subtilis*. DnaA binds DnaA-boxes in the *incC* region, leading to oligomer formation on DnaA-trios and DNA strand separation. DnaD is then loaded on the exposed top strand and provides a pathway for strand-specific helicase recruitment to promote bidirectional DNA replication.

**A**

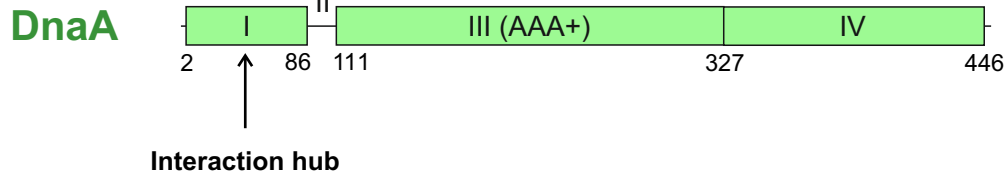

**B**

*B. subtilis* DnaA<sup>DI</sup>

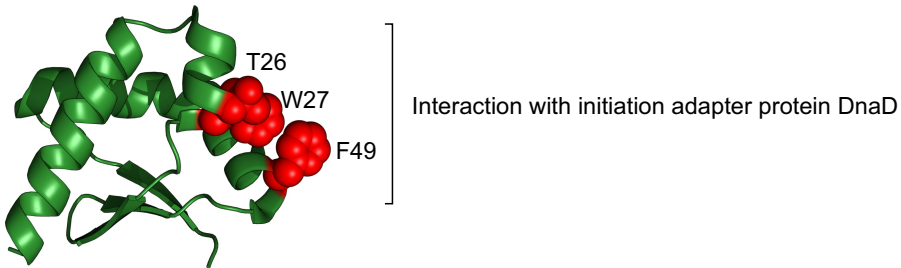

**C**

*E. coli* DnaA<sup>DI</sup>

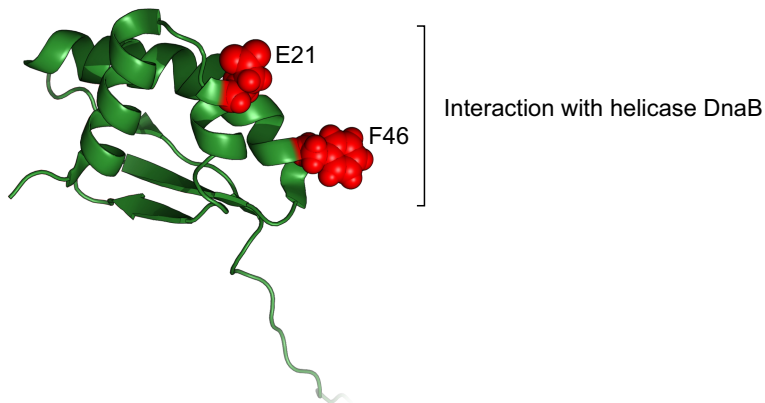

**Figure S1. Domain organisation of DnaA highlighting a shared interaction hub in domain I.** (A) *B. subtilis* DnaA domain organisation with amino acid boundaries indicated. (B) Crystal structure of *B. subtilis* DnaA domain I (PDB 4TPS) with residues thought to be involved in protein-protein interactions highlighted in red. (C) NMR structure of *E. coli* DnaA domain I (PDB 2E0G) with residues thought to be involved in protein-protein interactions highlighted in red.

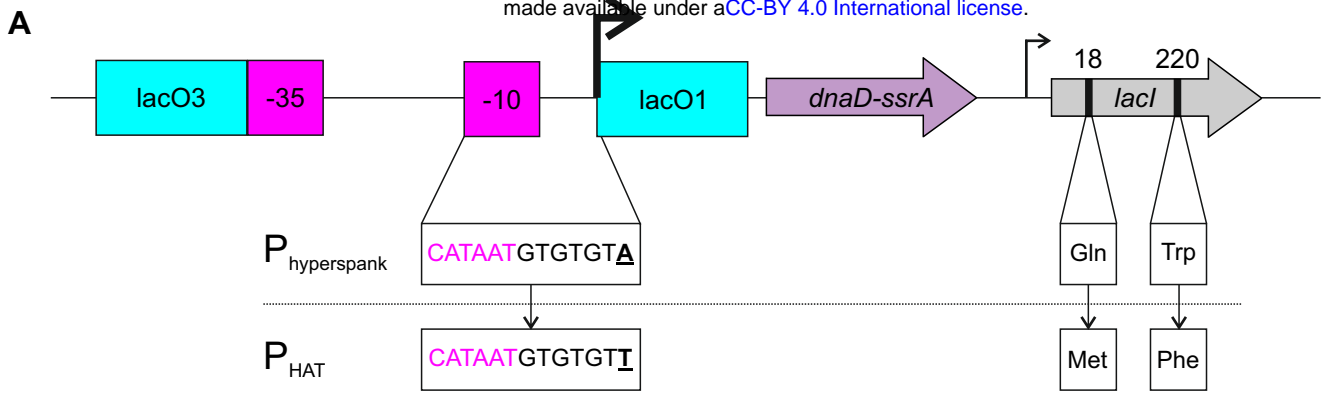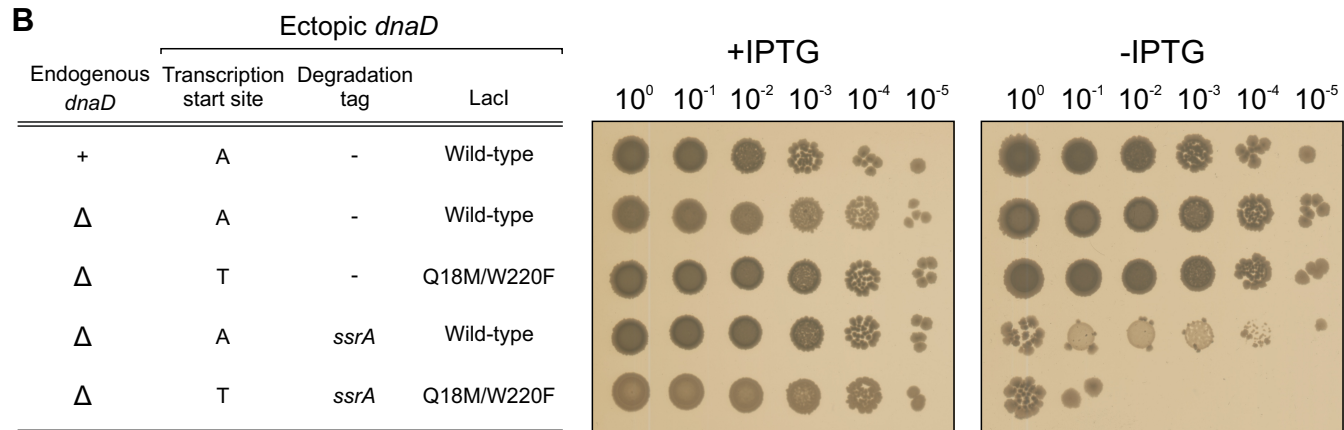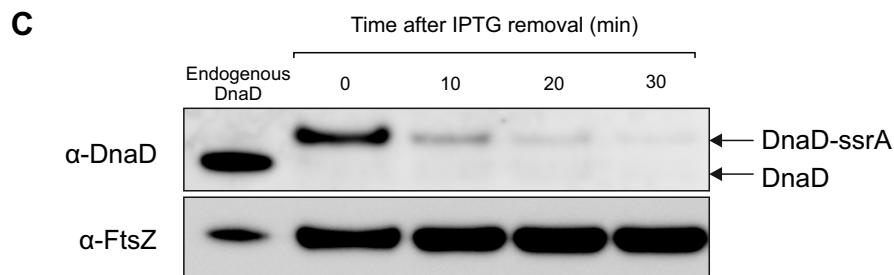

**Figure S2. Construction of the inducible *dnaD-ssrA* strain. (A)** Schematics of the inducible system used to drive the expression of the *dnaD-ssrA* fusion. **(B)** Spot-titre assay showing the combination required to achieve conditional DnaD-ssrA complementation. *dnaD*  $P_{\text{HYPERSPANK}}$ -*dnaD* (CW2),  $\Delta$ *dnaD*  $P_{\text{HYPERSPANK}}$ -*dnaD* (CW231),  $\Delta$ *dnaD*  $P_{\text{HAT}}$ -*dnaD* (CW103),  $\Delta$ *dnaD*  $P_{\text{HYPERSPANK}}$ -*dnaD-ssrA* (CW232),  $\Delta$ *dnaD*  $P_{\text{HAT}}$ -*dnaD-ssrA* (CW164). **(C)** Immunoblot analysis of the inducible *dnaD-ssrA* cassette (CW197); endogenous *dnaD* control (HM715). The tubulin homolog FtsZ was used as a loading control.



## Endogenous *dnaD* locus

## Extrachromosomal *dnaD* locus

Chromosome

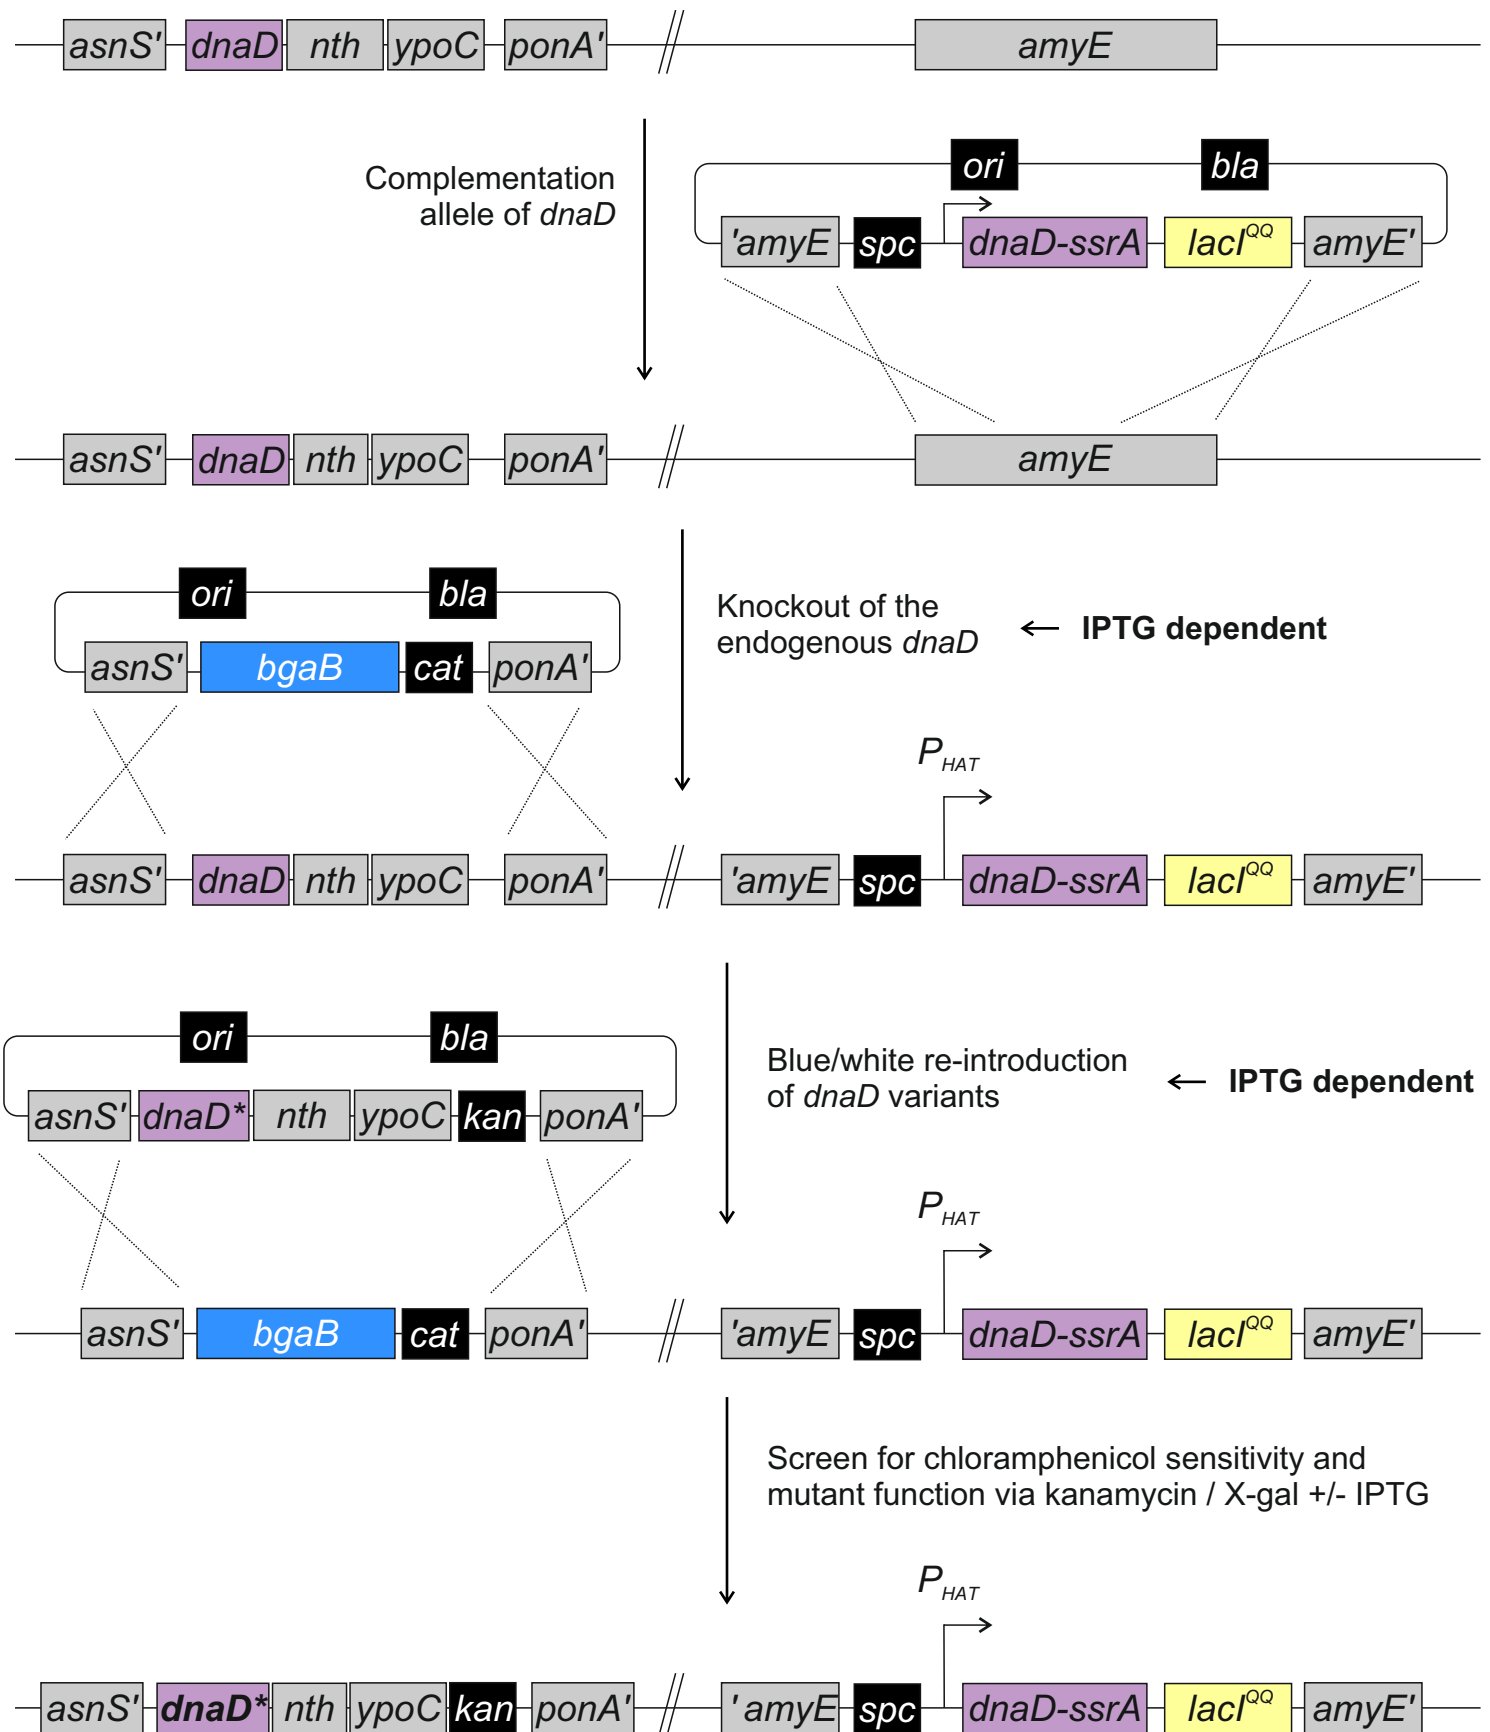

**Figure S3. Methodology for genetic complementation and introduction of *dnaD* mutants.** Schematics of the blue/white screening assay. The inducible complementation cassette *dnaD-ssrA* was inserted at the *amyE* locus, followed by replacement of the native *dnaD* operon by a *bgaB* cassette (encoding  $\beta$ -galactosidase). Selection of *dnaD* mutants is performed in the presence of kanamycin, X-gal (blue/white) and IPTG (functional complementation).

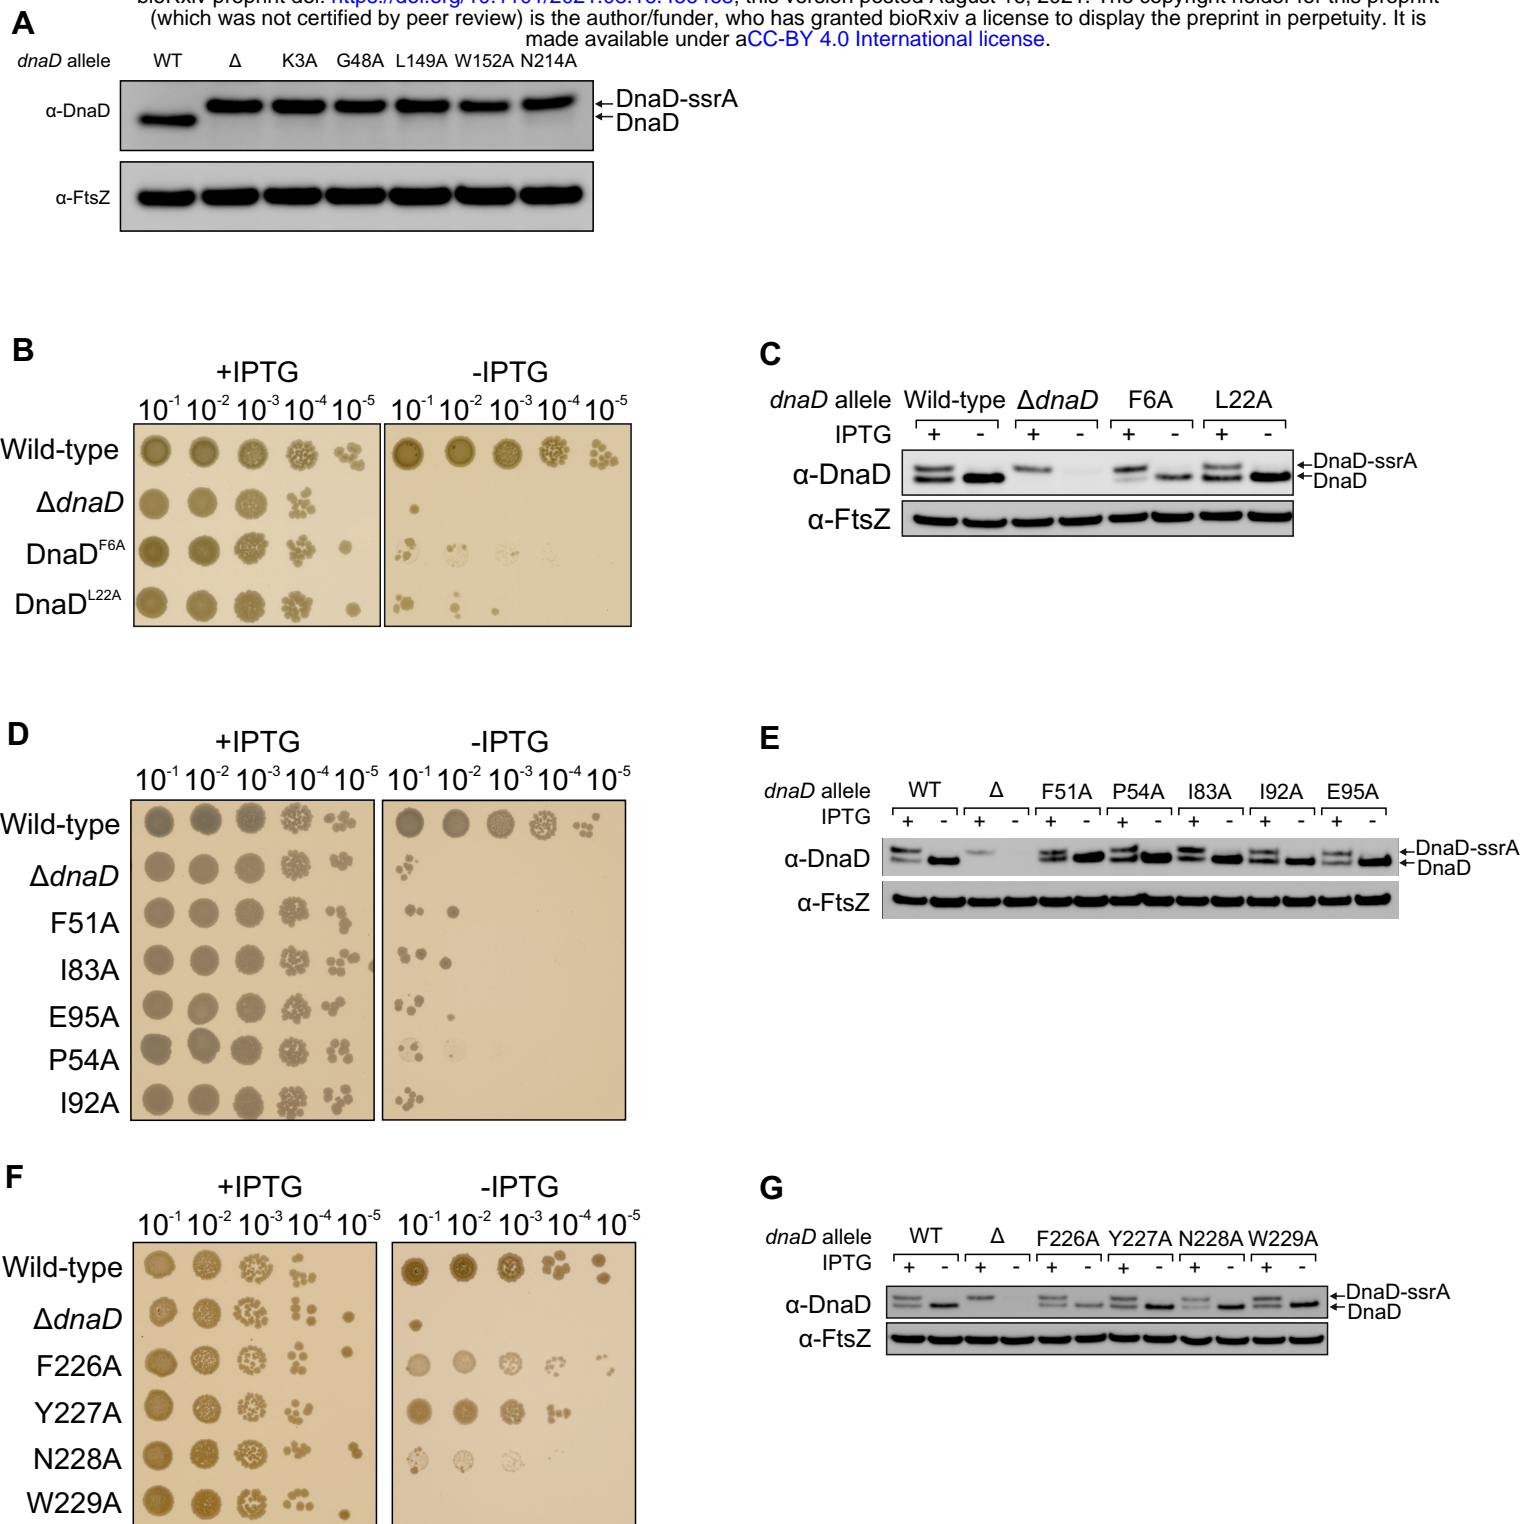

**Figure S4. Analysis of lethal and sick alanine substitutions in DnaD.** (A) Immunoblotting shows that some lethal alanine substitutions in DnaD were not well expressed *in vivo*. (B, D, F) Spot titre analysis of alanine substitutions in DnaD that were well expressed as judged by immunoblotting (C, E, G). The tubulin homolog FtsZ was used as a loading control.



**A**

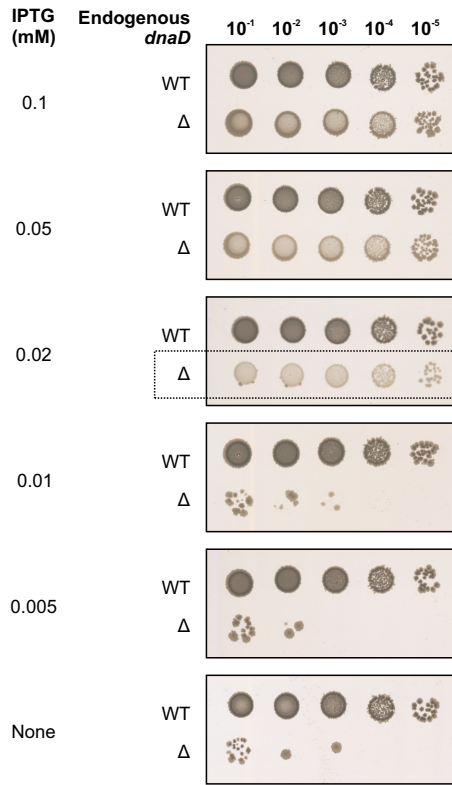

**B**

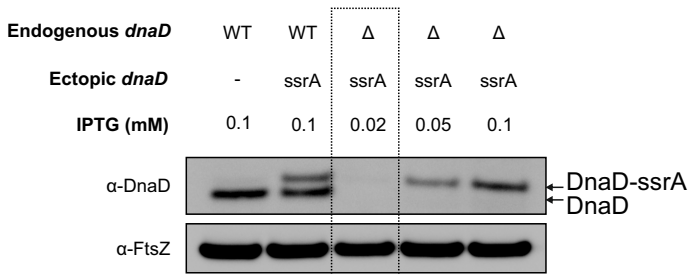

**Figure S5. Low levels of DnaD expression sustain cell growth. (A)** DnaD-SsrA was titrated via IPTG induction. The *dnaD-ssrA* cassette was able to sustain growth at IPTG concentration of 0.02 mM and above. **(B)** Immunoblotting shows that expression of DnaD was undetectable in viable colonies grown with 0.02 mM IPTG. The tubulin homolog FtsZ was used as a loading control.

**A**

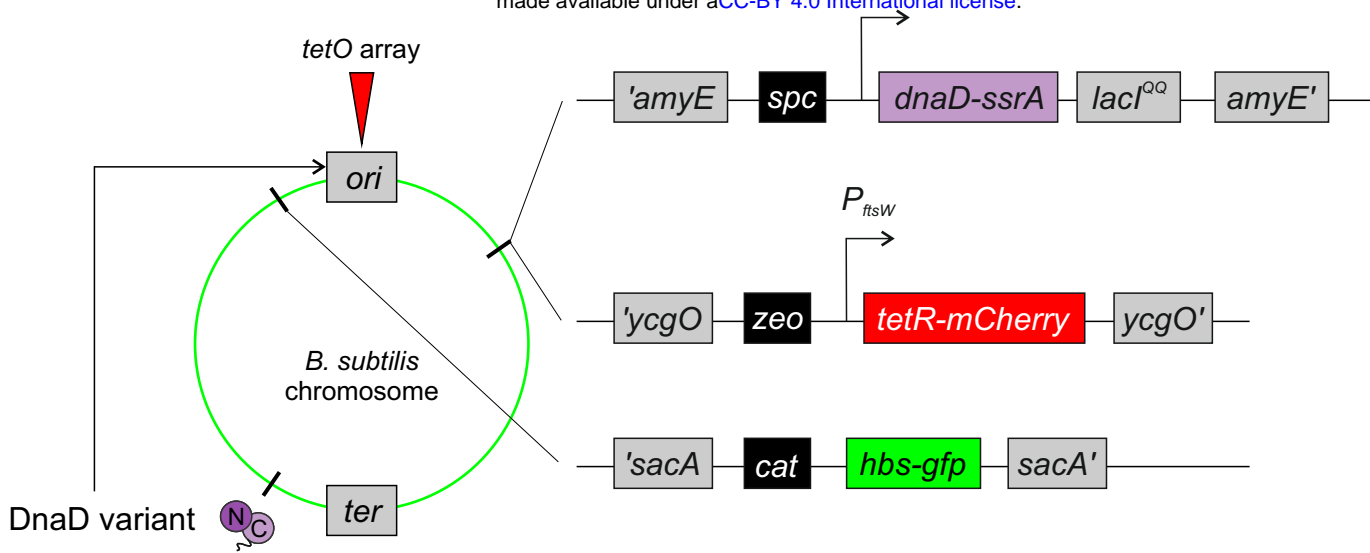

**B**

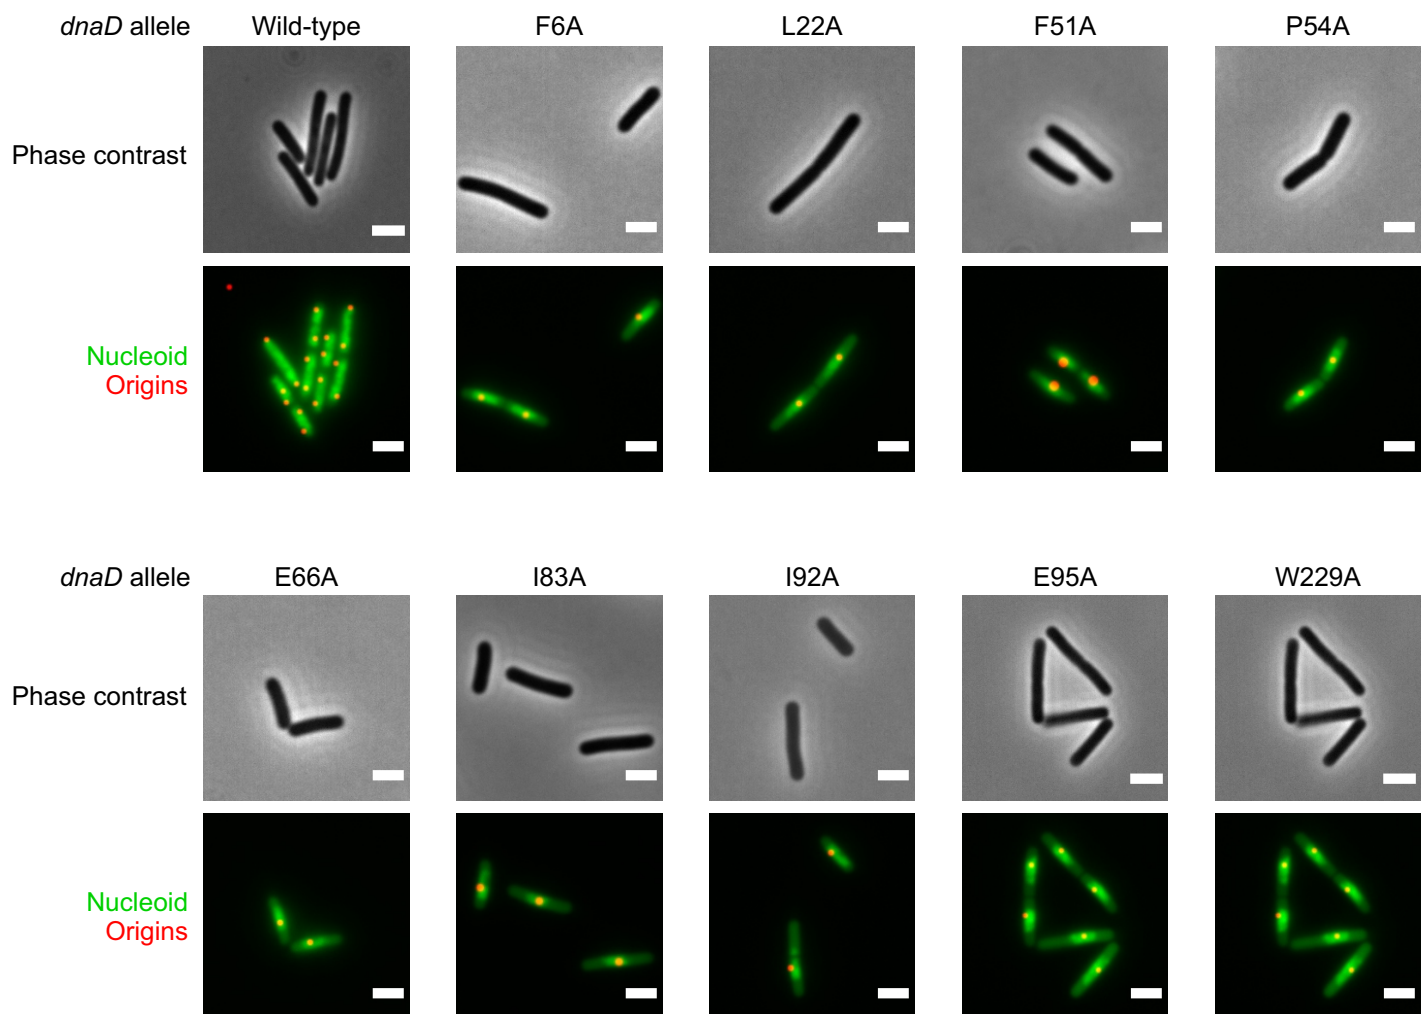

**Figure S6. Methodology for single-cell analysis of *dnaD* mutants using fluorescence microscopy.** (A) Schematics of the dual fluorescence system with TetR-mCherry binding to *tetO* sites located near the origin and Hbs-GFP allowing visualisation of the nucleoid. (B) Representative images of essential *dnaD* mutants observed by fluorescence microscopy via the system described in (A).

**A**

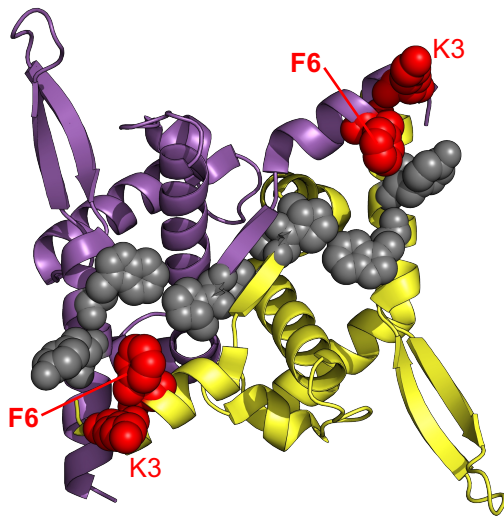

**B**

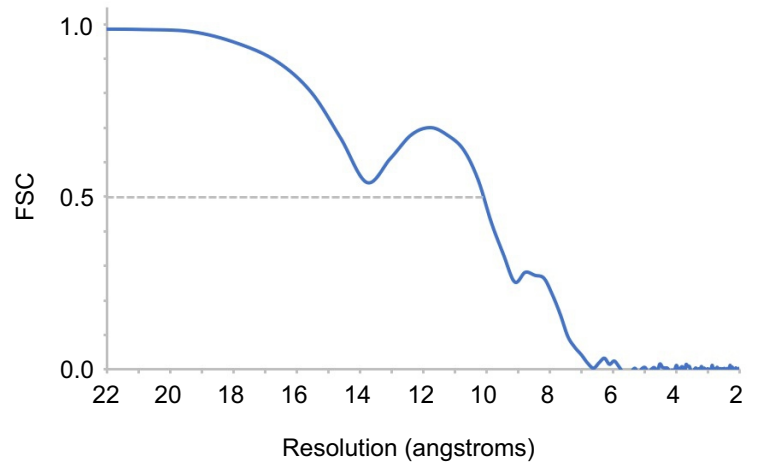

**C**

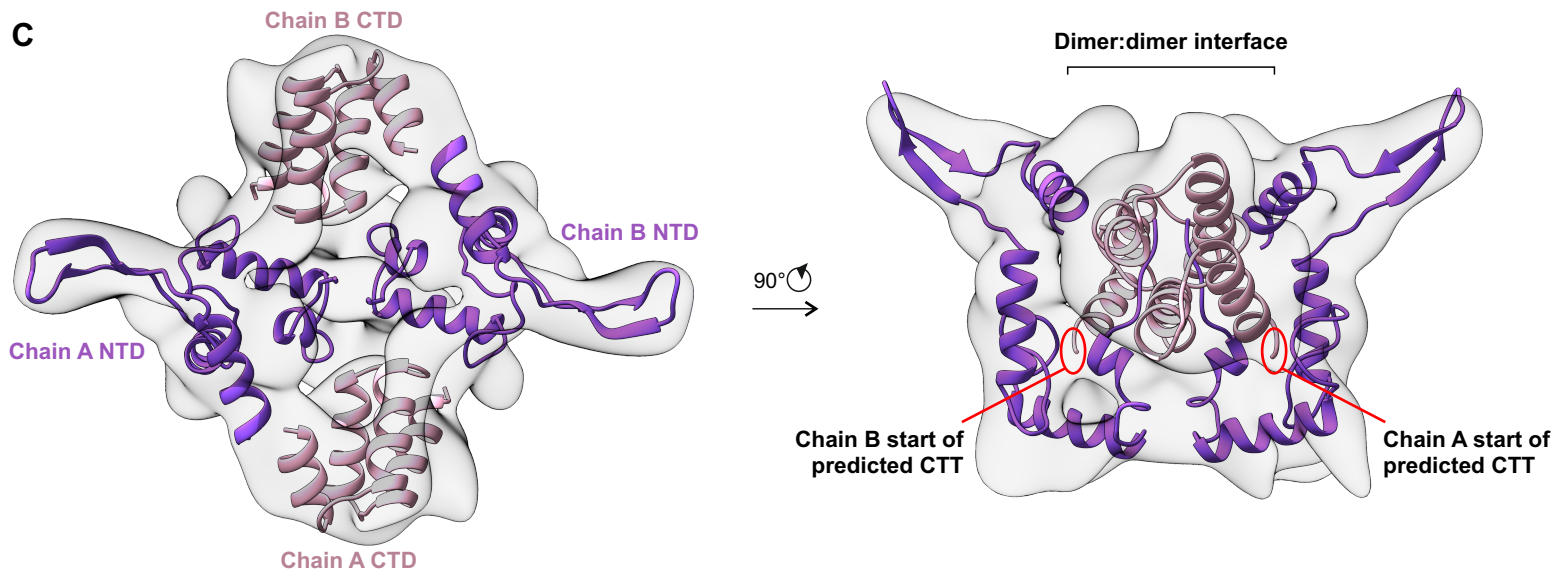

**Figure S7. A network of critical residues along the proposed DnaD dimer:dimer interface.** (A) Crystal structure of DnaD N-terminal domain (PDB 2V79) mapped with alanine substitutions that are either lethal essential (red) or perturb growth (grey). (B) Overall resolution of the DnaD dimer, derived from two independently refined half-maps, using the FSC=0.5 criteria. (C) Cryo-EM map fitted with the available DnaD structures (purple N-terminal domains from PDB 2V79 and pink C-terminal domains from 2ZC2).

**A**

|                                            |                          |                                 |
|--------------------------------------------|--------------------------|---------------------------------|
| <i>Bacillus subtilis</i>                   | P F Y N <b>W</b> L E Q   | } <i>dnaB</i> homologue present |
| <i>Bacillus anthracis</i>                  | P L Y N <b>W</b> L E Q - |                                 |
| <i>Listeria monocytogenes</i>              | P L Y D <b>W</b> L E K R |                                 |
| <i>Staphylococcus aureus</i>               | P K F D <b>W</b> L N G E |                                 |
| <i>Enterococcus faecalis</i>               | T L H N <b>W</b> L N P E |                                 |
| <i>Streptococcus pneumoniae</i>            | D L - - <b>W</b> K D - - | } <i>dnaB</i> homologue absent  |
| <i>Moorella thermoacetica</i>              | D K Y R <b>E</b> L Y R L |                                 |
| <i>Alicyclobacillus macrosporangioidus</i> | E R Y N <b>A</b> F Y E L |                                 |
| <i>Desulfotomaculum orientis</i>           | S K Y E <b>N</b> F Y L - |                                 |

**B**

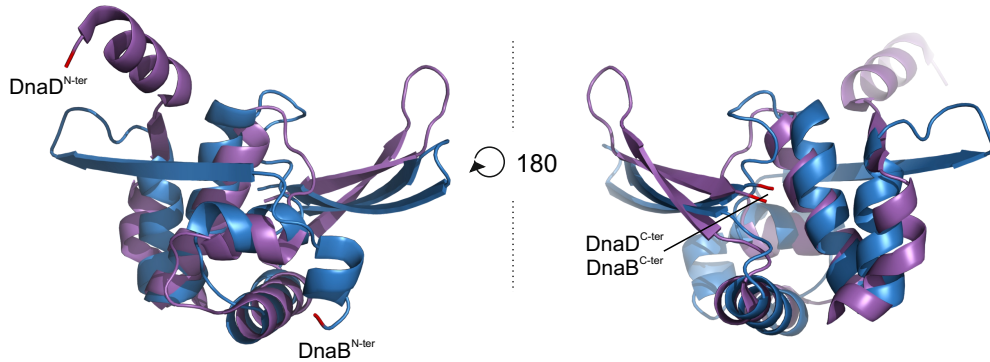

**Figure S8. Analysis of the DnaD C-terminal tail. (A)** *B. subtilis* DnaD<sup>W229</sup> (BsDnaD<sup>229</sup>) is conserved in homologs that also encode a copy of *dnaB*. **(B)** Structural overlap between DnaD (purple) and DnaB (blue) crystal structures (respectively PDB 2V79 and 5WTN).

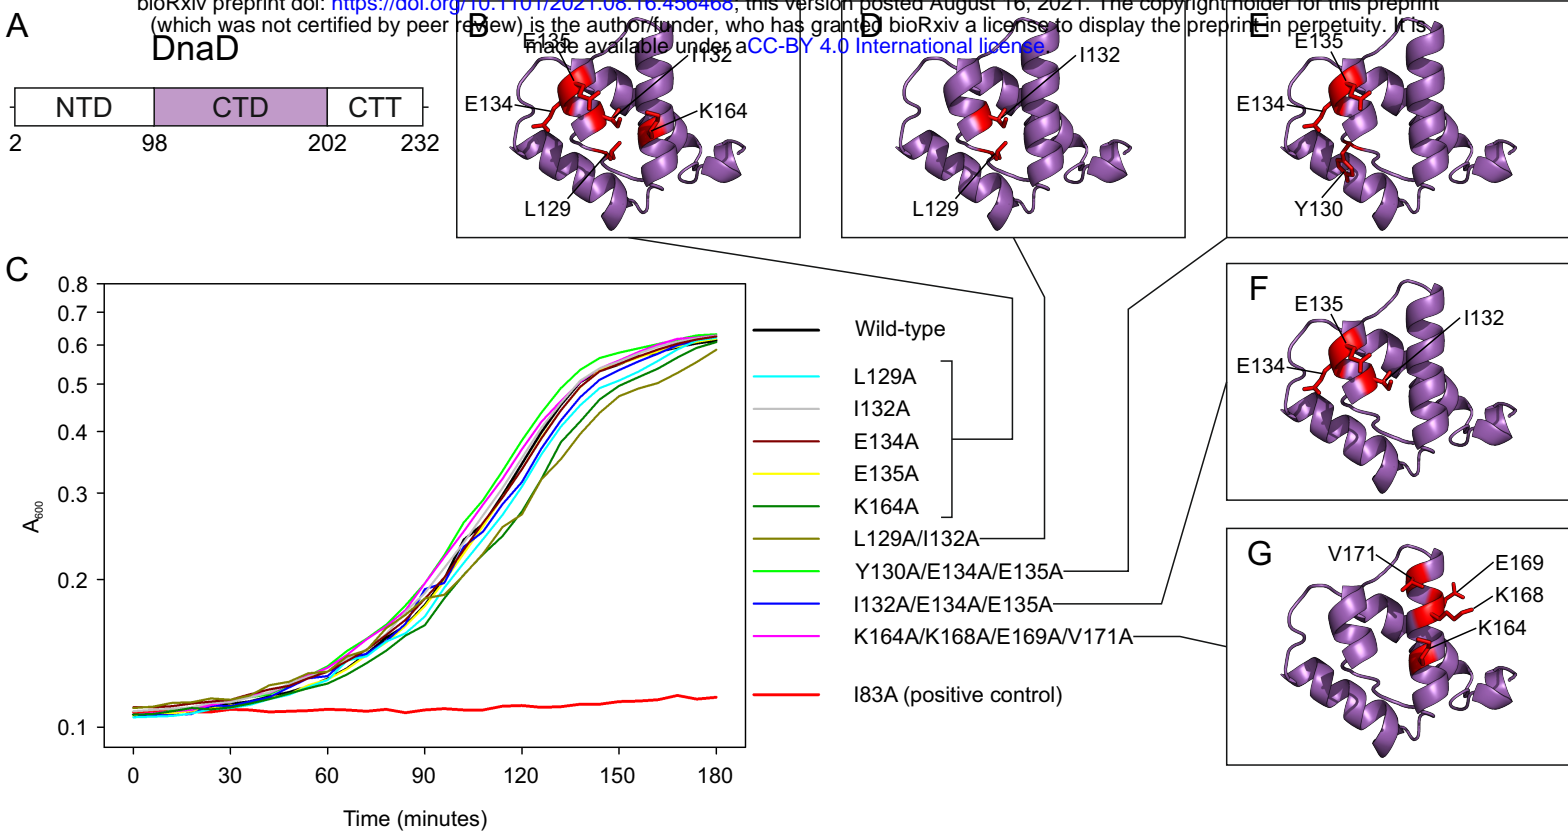

**Figure S9. Residues in DnaD C-terminal domain that interact with DnaA<sup>DI</sup> *in vitro* are not essential *in vivo*.** (A) Domain organisation of DnaD with amino acid boundaries indicated. (B) Individual substitutions in DnaD<sup>CTD</sup> mapped onto the NMR structure. (C) Growth analysis of *B. subtilis* DnaD variants using the inducible *dnaD-ssrA* strain. Wild-type (CW162); *dnaD*<sup>L129A</sup> (CW179), *dnaD*<sup>I132A</sup> (CW167), *dnaD*<sup>E134A</sup> (CW171), *dnaD*<sup>E135A</sup> (CW172), *dnaD*<sup>K164A</sup> (CW173), *dnaD*<sup>L129A/I132A</sup> (CW176), *dnaD*<sup>Y130A/E134A/E135A</sup> (CW177), *dnaD*<sup>I132A/E134A/E135A</sup> (CW178), *dnaD*<sup>K164A/K168A/E169A/V171A</sup> (CW168) and *dnaD*<sup>I83A</sup> (CW170). (D-G) Multiple substitutions in DnaD C-terminal domain mapped onto the NMR structure (Marston et al. 2010).

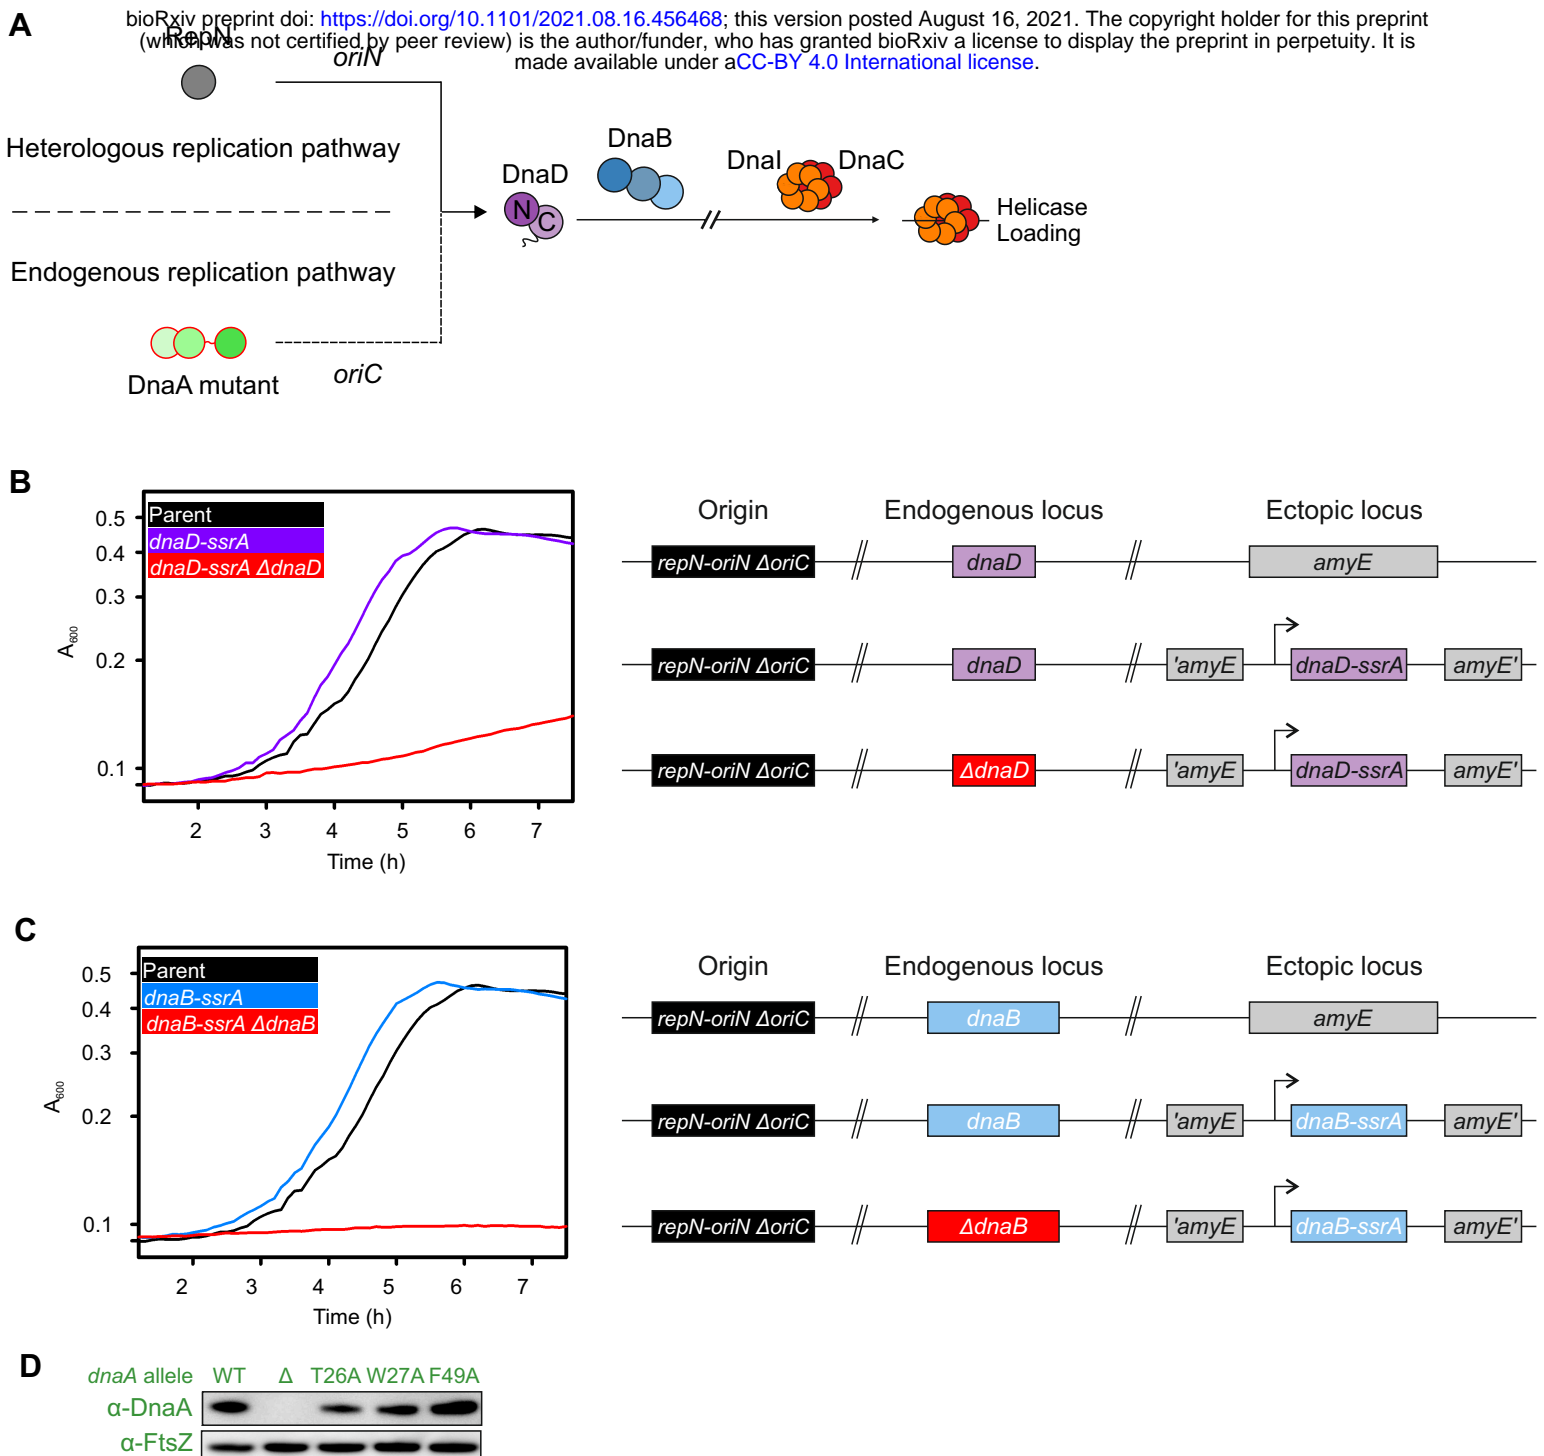

**Figure S10. Endogenous and heterologous DNA replication systems for the study of DnaA variants in *B. subtilis*.** (A) Endogenous replication via DnaA at *oriC* can be complemented by the presence of the heterologous *oriN-repN* replication system. Note that both pathways require DnaD and DnaB to achieve helicase loading. (B) Plate reader assay showing growth of a strain replicating exclusively via *oriN*, with and without DnaD expression. (C) Plate reader assay showing growth of a strain replicating exclusively via *oriN*, with and without DnaB expression. (D) Immunoblotting shows that DnaA<sup>DI</sup> variants were expressed at a similar level to wild-type in the context of the *oriN* strain. The tubulin homolog FtsZ was used as a control.



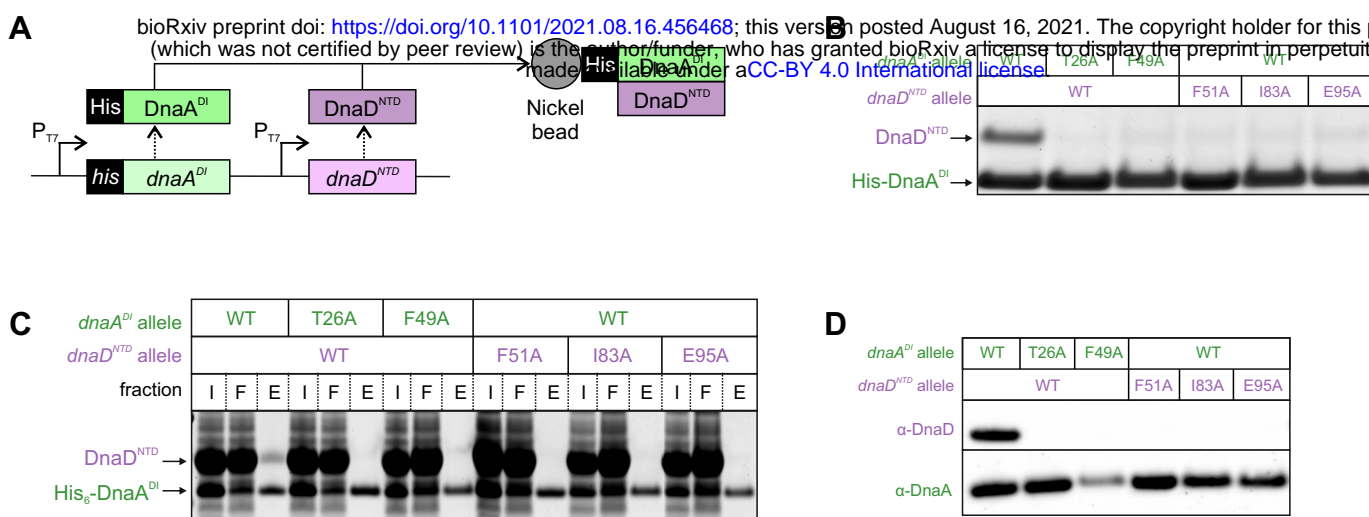

**Figure S11. DnaA<sup>DI</sup> and DnaD<sup>NTD</sup> mutants disrupt the DnaA-DnaD interaction. (A)** Schematic of the pull-down assay using *his<sub>6</sub>-dnaA<sup>DI</sup>* and *dnaD<sup>NTD</sup>*. **(B)** Pull-down assay showing loss of interaction between wild-type and variants of His<sub>6</sub>-DnaA<sup>DI</sup> and DnaD<sup>NTD</sup>. Wild type *his<sub>6</sub>-dnaA<sup>DI</sup>/dnaD<sup>NTD</sup>* (pSP75), *his<sub>6</sub>-dnaA<sup>DI-T26A</sup>/dnaD<sup>NTD</sup>* (pSP83), *his<sub>6</sub>-dnaA<sup>DI-F49A</sup>/dnaD<sup>NTD</sup>* (pSP85), *his<sub>6</sub>-dnaA<sup>DI</sup>/dnaD<sup>NTD-F51A</sup>* (pSP80), *his<sub>6</sub>-dnaA<sup>DI</sup>/dnaD<sup>NTD-I83A</sup>* (pSP81), *his<sub>6</sub>-dnaA<sup>DI</sup>/dnaD<sup>NTD-E95A</sup>* (pSP82). **(C)** Eluate staining from DnaA-DnaD pull-down assays showing loss of interaction between His<sub>6</sub>-DnaA<sup>DI</sup> and DnaD<sup>NTD</sup> when using mutant variants. Strains are same as panel (B). Input, Flow through and Eluate fractions are respectively indicated as I, F and E. **(D)** Immunoblot analysis of DnaA and DnaD mutant overexpression eluates from pull-down assays. Strains are same as panel (B).

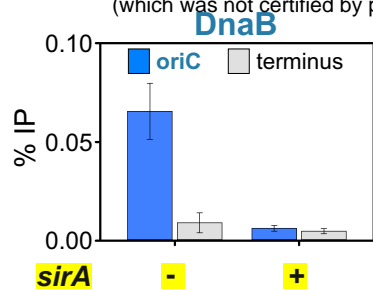

**Figure S12. SirA overexpression abolishes DnaB recruitment to *oriC*.** ChIP of DnaB at *oriC* following overexpression of SirA.

**A**

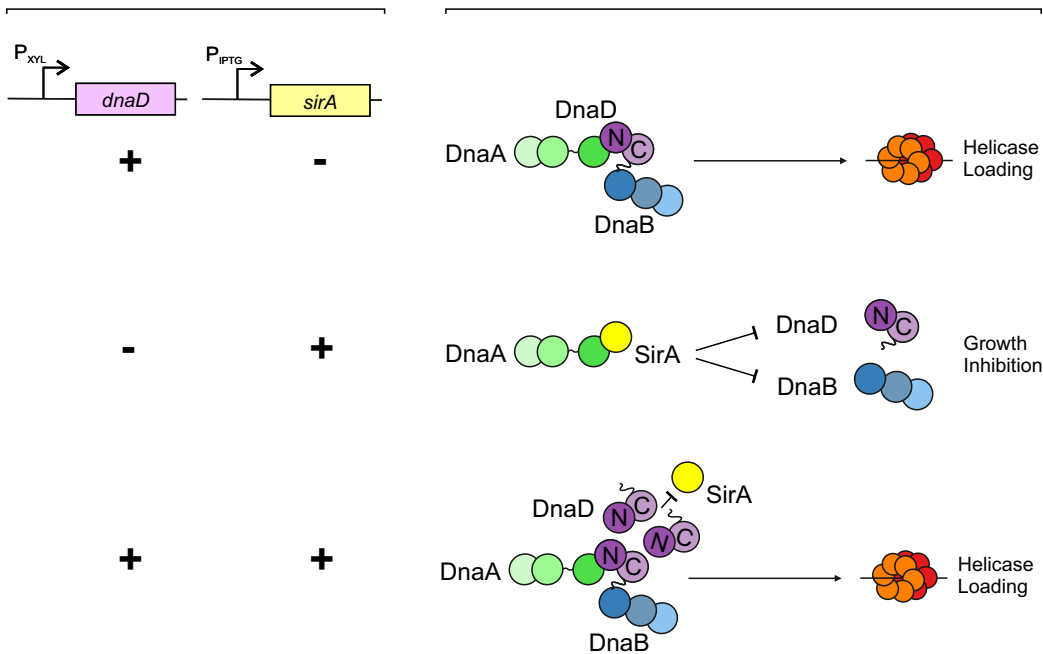

**B**

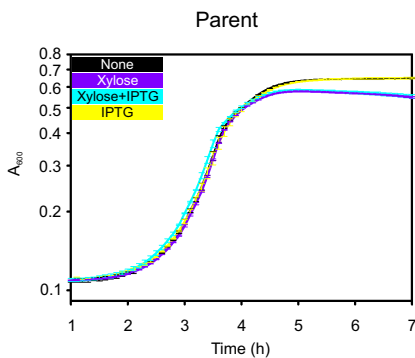

**C**

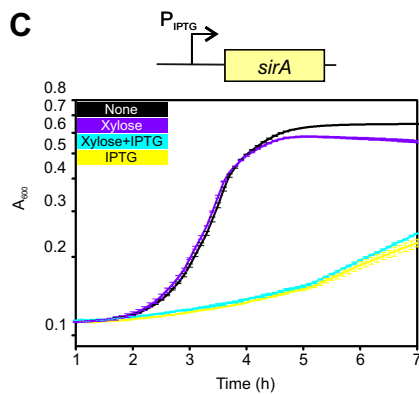

**D**

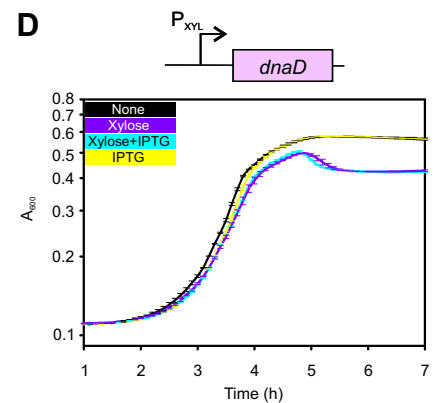

**E**

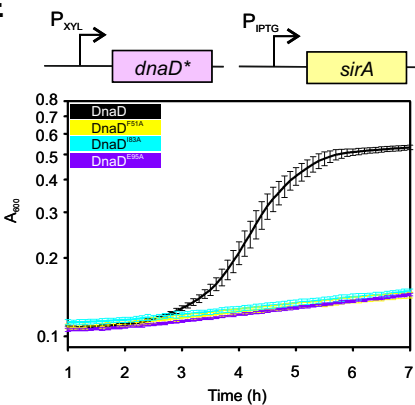

**F**

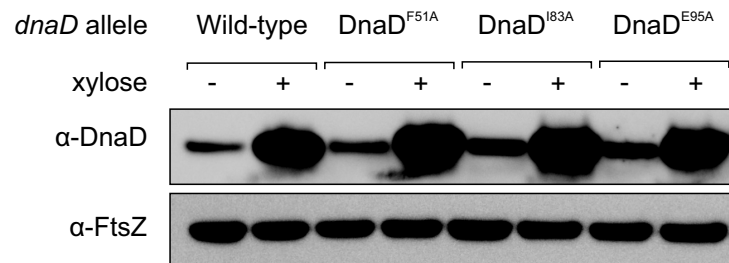

**Figure S13. SirA inhibits the DnaA:DnaD interaction by preventing DnaD recruitment to *oriC*.** (A) Schematics of DnaD/SirA overexpression assay. DnaD overexpression on its own does not affect bacterial growth while SirA overexpression inhibits growth. This inhibition is alleviated when overexpressing DnaD along SirA. (B-D) Plate reader analysis with either no inducer (None), Xylose (0.35%), IPTG (0.035 mM) or Xylose (0.35%) and IPTG (0.035 mM). (B) Shows that wild type *B. subtilis* (HM715) grows in all conditions. (C) Shows that SirA overexpression in a strain background lacking the DnaD overexpression cassette inhibits bacterial growth, and that this inhibition is solely due to the addition of IPTG. *P<sub>HYPERSPANK</sub>-sirA* (CW260). (D) Shows that DnaD overexpression in a strain background lacking the SirA overexpression cassette does not affect bacterial growth. *P<sub>XYL</sub>-dnaD* (CW261). (E) Plate reader analysis in the presence of Xylose (0.35%) and IPTG (0.1mM) shows that DnaD<sup>NTD</sup> mutants F51A, I83A and E95A do not rescue SirA-dependent growth inhibition. Error bars in (B-E) indicate the standard error of the mean for two biological replicates. (F) Immunoblot analysis of DnaD variants overexpression by xylose induction (0.35%). The tubulin homolog FtsZ was used as a control.

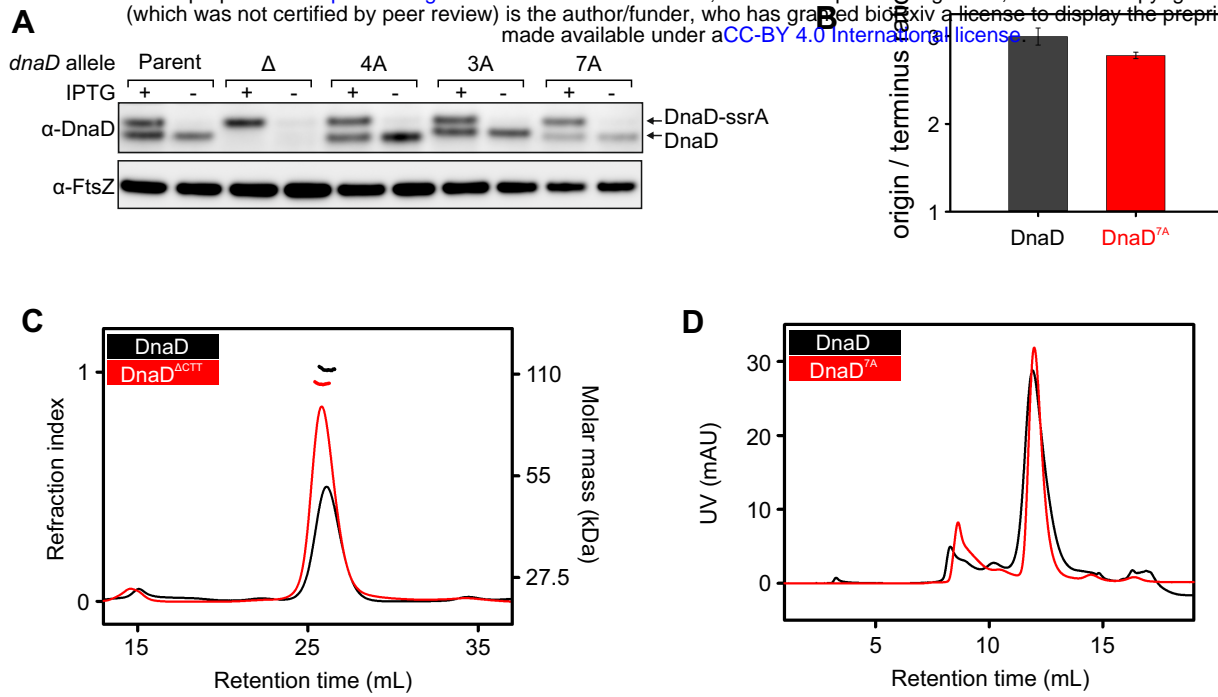

**Figure S14. DnaD ssDNA binding characterisation. (A)** Immunoblotting of multiple alanine substitution DnaD variants targeting positively charged and aromatic residues within the C-terminal tail. The tubulin homolog FtsZ was used as a loading control. **(B)** Marker frequency analysis of the *dnaD*<sup>7A</sup> mutant using quantitative PCR. **(C)** SEC-MALS analysis of the DnaD variant lacking the C-terminal tail. **(D)** SEC analysis of DnaD<sup>7A</sup>.

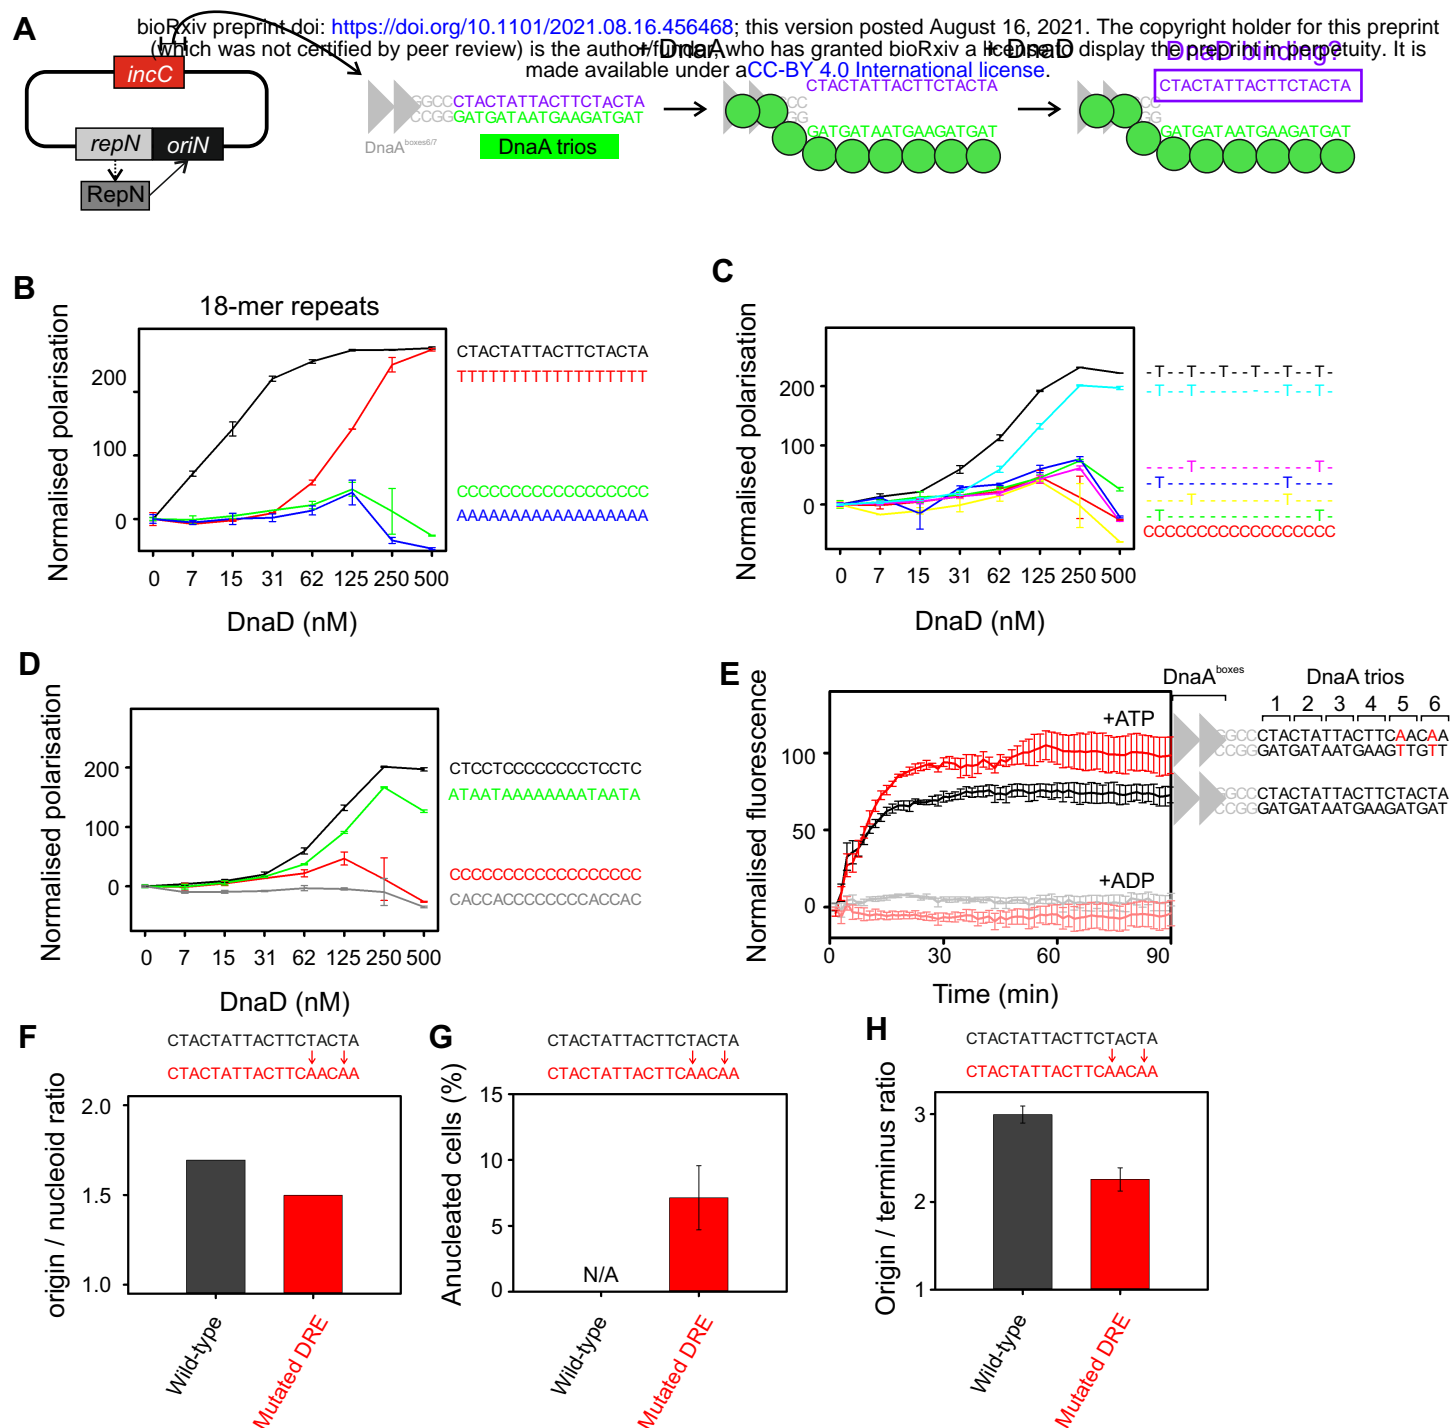

**Figure S15. Two 5'-TnnT-3' repeats are required for DnaD ssDNA binding *in vitro* and DNA replication initiation *in vivo*.** (A) Illustration of the proposed basal origin unwinding mechanism involving DnaA oligomer formation on DnaA-trios. (B) Fluorescence polarisation analysis of DnaD binding homopolymeric 18-mers. (C) Fluorescence polarisation analysis of DnaD binding 5'-TnnT-3' motifs located within an inert ssDNA substrate. (D) Fluorescence polarisation analysis of DnaD binding 5'-TnnT-3' motifs located within an inert ssDNA substrate, and binding 5'-AnnA-3' motifs. (E) Strand separation assay showing that mutating the distal 5'-TnnT-3' element relative to the DnaA-boxes does not affect DnaA strand separation activity *in vitro*. (F) Quantification of origins per nucleoid in the DRE mutant background based on microscopy images taken following cell growth at 20°C. (G) Quantification of anucleated cells found in the DRE mutant background over the count of 750 cells from microscopy images taken following cell growth at 37°C. (H) Marker frequency analysis of the DRE mutant at 37°C measured using quantitative PCR.

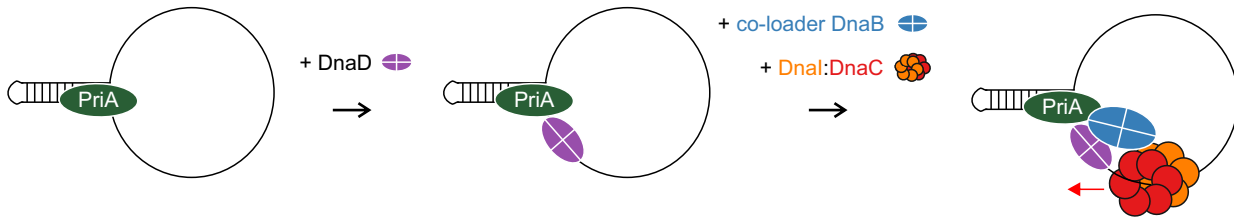

**Figure S16. Model for helicase recruitment and loading in *B. subtilis* during PriA-dependent replication restart at a single-strand origin (sso).**
