# Supplementary material for: Positive and negative control of helicase recruitment at a bacterial chromosome origin
Source: bioRxiv or medRxiv preprint supplement (doi:10.1101/2021.08.16.456468), 2021-08-16
Supplement: Supplementary file [file media-1.pdf]

## 1 **Supplementary Methods**

2

### 3 *Strains*

4 *B. subtilis* strains are listed in Supplementary Table 1. Transformation of competent *B.*  
5 *subtilis* cells was performed using an optimized two-step starvation procedure as previously  
6 described (Anagnostopoulos and Spizizen, 1961; Hamoen et al., 2002). Briefly, recipient  
7 strains were grown overnight at 37°C in transformation medium (Spizizen salts  
8 supplemented with 1 µg/ml Fe-NH<sub>4</sub>-citrate, 6 mM MgSO<sub>4</sub>, 0.5% glucose, 0.02 mg/ml  
9 tryptophan and 0.02% casein hydrolysate) supplemented with IPTG where required.  
10 Overnight cultures were diluted 1:17 into fresh transformation medium supplemented with  
11 IPTG where required and grown at 37°C for 3 hours with continual shaking. An equal volume  
12 of prewarmed starvation medium (Spizizen salts supplemented with 6 mM MgSO<sub>4</sub> and 0.5%  
13 glucose) was added and the culture was incubated at 37°C for 2 hours with continual  
14 shaking. DNA was added to 350 µl cells and the mixture was incubated at 37°C for 1 hour  
15 with continual shaking. 20-200 µl of each transformation was plated onto selective media  
16 supplemented with IPTG where required and incubated at 37°C for 24-48 hours. The  
17 genotype of all chromosomal *dnaA* and *dnaD* mutants was confirmed by DNA sequencing.

18

19 **CW197** (*trpC2 ΔdnaD amyE::spc(P<sub>HSA+1T</sub>-dnaD-ssrA lacI<sup>Q18M/W220F</sup>)*) was constructed to study  
20 potentially lethal mutants of *dnaD in vivo* (Fig. 1B). First, an ectopic copy of *dnaD* was  
21 placed under the control of an IPTG-inducible promoter (*P<sub>HYPERSPANK</sub>*)(Wagner et al., 2009).  
22 When combined with a deletion mutant of the native *dnaD*, the basal expression level of the  
23 ectopic copy was sufficient to sustain growth. Two approaches were taken to reduce the  
24 basal expression of the ectopic *dnaD*, lowering promoter activity and reducing DnaD  
25 stability. Promoter activity was inhibited by altering the transcription start site from A to T  
26 (*P<sub>HAT</sub>*) and introducing mutations into *lacI* (Q18M/W220F) that increase operator binding  
27 (Daber and Lewis, 2009; Gatti-Lafranconi et al., 2013)(Fig. S2A). DnaD stability was reduced  
28 by fusing the ectopic *dnaD* to an *ssrA* degradation tag (AANDENYSENYALGG)(Griffith and

29 Grossman, 2008). Together these modifications produced a suitable expression system that  
30 conditionally complements the *dnaD* deletion mutant only when the ectopic *dnaD-ssrA* is  
31 induced (Fig. S2B). Immunoblot analysis confirmed nearly complete degradation of DnaD-  
32 *ssrA* following removal of IPTG within 30 minutes (Fig. S4C).

33

34 **CW198** (MDS42  $\Delta recA \Delta pdu \Delta rnh::kan$ ) was constructed by P1 transduction of  $\Delta rnh::kan$   
35 from JW0204 (Keio collection) into CW181 (MDS42  $\Delta recA \Delta pdu$  (Posfai et al., 2006))  
36 harbouring pEAW365 (pET21A  $P_{recA-recA}$ ), a gift from Elizabeth Wood and Michael Cox),  
37 followed by propagation in the absence of ampicillin to lose pEAW365.

38

39 **CW252** (*trpC2 amyE::spec(lacI P<sub>HYPERSPANK</sub>-sirA) ganA::erm(xyIR P<sub>XYL</sub>-dnaD)*) was  
40 constructed by transformation with a PCR product generated by three-way Gibson assembly  
41 (NEBuilder HiFi). The *dnaD* gene with its native ribosome binding site was amplified using  
42 oCW611 and oCW612 using 168CA genomic DNA as template. The flanking region  
43 containing *ganA'-xyIR-P<sub>XYL</sub>* was amplified using oCW284 and oCW614 with pJMP1 as  
44 template. The flanking region containing *erm-'ganA* was amplified using oCW613 and  
45 oCW130 with pJMP1 as template.

46

47 **CW270** (*trpC2 amyE::spec(lacI P<sub>HYPERSPANK</sub>-sirA) ganA::erm(xyIR P<sub>XYL</sub>-dnaD<sup>I83A</sup>)*) was  
48 constructed identically to CW252 with the exception of *dnaD<sup>F51A</sup>*, *dnaD<sup>I83A</sup>* and *dnaD<sup>E95A</sup>*  
49 being amplified using oCW611 and oCW612 from CW174, CW170 and CW166 genomic  
50 DNA respectively as templates.

51

52 **HM1784** (BTH101  $\Delta rnh::kan$ ) was constructed by P1 transduction of  $\Delta rnh::kan$  from JW0204  
53 (Keio collection) into BTH101 [F<sup>-</sup>, *cya-99*, *araD139*, *galE15*, *galK16*, *rpsL1* (Str<sup>r</sup>), *hsdR2*,  
54 *mcrA1*, *mcrB1* (Euromedex)].

55

56 **HM1792** (DH5 $\alpha$   $\Delta$ *rrh::kan*) was constructed by P1 transduction of  $\Delta$ *rrh::kan* from JW0204  
57 (Keio collection) into HM1785 (DH5 $\alpha$  harbouring pEAW365 (pET21A  $P_{recA}$ -*recA*)), followed  
58 by propagation in the absence of ampicillin to lose pEAW365.

59

60 **DnaD alanine substitution strains** were generated by a blue/white screening assay using  
61 CW197 as parental strain and mutant plasmids obtained after Quickchange mutagenesis  
62 and sequencing as recombinant DNA (Fig. S3). X-gal 0.016% w/v was added to  
63 transformation plates for detection of  $\beta$ -galactosidase activity and selection of kanamycin  
64 resistant white colonies that integrated mutant DNA by double-recombination. Three  
65 individual white colonies per mutant were then restreaked onto a medium either with or  
66 without IPTG to identify alleles of interest.

67

68 *Plasmids*

69 Plasmids are listed in the Supplementary Table 2 (sequences are available upon request).  
70 DH5 $\alpha$  [F<sup>-</sup>  $\Phi$ 80/*lacZ* $\Delta$ M15  $\Delta$ (*lacZYA-argF*) U169 *recA1 endA1 hsdR17*(r<sub>k</sub><sup>-</sup>, m<sub>k</sub><sup>+</sup>) *phoA supE44*  
71 *thi-1 gyrA96 relA1*  $\lambda$ ] (Taylor et al., 1993) was used for plasmid construction, except for  
72 plasmids harbouring *dnaD* that were constructed in CW198. Descriptions, where necessary,  
73 are provided below.

74

75 **DnaD alanine-scan mutant plasmids** were generated by Quickchange mutagenesis using  
76 oligonucleotides listed in Supplementary Table 5. Cloning protocols were adapted to a 96-  
77 well plate format for PCR amplification of mutant plasmids, heat-shock and transformation  
78 recovery. All plasmids were sequenced.

79

80 **pCW123, pCW141, pCW142, pCW143, pCW153, pCW163, pCW214, pHM543, pHM544,**  
81 **pHM545** were generated by Quickchange mutagenesis using the oligonucleotides listed in  
82 Supplementary Table 3.

83

84 **pCW4** was generated by cloning *HindIII-SphI* PCR fragments generated using  
85 oligonucleotides listed in Supplementary Table 3.

86

87 **pDS84, pDS119, pDS120, pDS126, pDS127, pDS132, pHM359, pHM638, pHM640,**  
88 **pHM642, pHM644** were generated by cloning *Asp718I-BamHI* PCR fragments generated  
89 using the oligonucleotides listed in Supplementary Table 3.

90

91 **pCW66, pCW137, pCW171, pCW213, pSP075, pSP080, pSP081, pSP082, pSP083,**  
92 **pSP085** were generated by ligase-free cloning via two-step assembly processes using  
93 oligonucleotides listed in Supplementary Table 3. The underlined part of each primer  
94 indicates the region used to form an overlap. FastCloning (Li et al., 2011) was used with  
95 minor modifications. PCR products (15  $\mu$ l from a 50  $\mu$ l reaction) were mixed and then

96 subjected to a heating/cooling regime: two cycles of 98°C for 2 minutes then 25°C for 2  
97 minutes, then one cycle of 98°C for 2 minutes then 25°C for 60 minutes. After cooling *DpnI*  
98 restriction enzyme (1 µl) was added to digest parental plasmids and the mixtures were  
99 incubated at 37°C for ~4 hours. Following digestion 10 µl of the PCR mixture was  
100 transformed into chemically competent *E. coli*. Where several primer pairs are listed for the  
101 construction of a single plasmid (Multi-step assembly column in Supplementary Table 3),  
102 multiple rounds of ligase free cloning were performed to obtain the final constructs.

103

104

105 *Oligonucleotides*

106 All oligonucleotides were purchased from Eurogentec. Oligonucleotides used for plasmid  
107 construction are listed in Supplementary Table 3, oligonucleotides used for qPCR are listed  
108 in Supplementary Table 4 and those generated by the Quickchange program are listed in  
109 Supplementary Table 5.

110

111 **Quickchange mutagenesis** was used for the construction of the DnaD mutant plasmid  
112 library. Each point mutant was assembled by PCR using mutagenic primers carrying a single  
113 alanine substitution(Liu and Naismith, 2008). We generated all mutant primer pairs via an in-  
114 house Quickchange program that optimised sequences according to key features in site-  
115 directed mutagenesis primer design. These include sequence length adjustments based on:  
116 (i) the melting temperature ( $T_M$ ) of the oligonucleotide part that anneals to the template  
117 plasmid, (ii) the  $T_M$  corresponding to a primer pair overlapping section, (iii) the GC-content  
118 within different sections of individual primers, (iv) the presence of a GC-clamp at every  
119 oligonucleotide 3'-end, and (v) the  $T_M$  difference between forward and reverse primer pairs.  
120 Code was written in Java and is available upon request.

121

122 *ChIP*

123 Strains were grown overnight at 30°C in Spizizen salts supplemented with tryptophan (20  
124 µg/ml), glutamate (0.1%), glucose (0.5%) and casamino acid (0.2%). The following day  
125 cultures were diluted 1:100 into fresh medium and allowed to grow to an A<sub>600</sub> of 0.4.  
126 Samples were resuspended in PBS and cross-linked with formaldehyde (final concentration  
127 1%) for 10 min at room temperature, then quenched with 0.1 M glycine. Cells were pelleted  
128 at 15°C, washed three times with PBS (pH 7.3) then frozen in liquid nitrogen and stored at -  
129 80°C. Frozen cell pellets were resuspended in 500 µl of lysis buffer (50 mM NaCl, 10 mM  
130 Tris-HCl pH 8.0, 20% sucrose, 10 mM EDTA, 100 µg/ml RNase A, ¼ complete mini  
131 protease inhibitor tablet (Roche), 2000 K u/µl Ready-Lyse lysozyme (Epicentre)) and  
132 incubated at 37°C for 30 min to degrade the cell wall. 500 µl of immunoprecipitation buffer  
133 (300 mM NaCl, 100 mM Tris-HCl pH 7.0, 2% Triton X-100, ¼ complete mini protease  
134 inhibitor tablet (Roche), 1 mM EDTA) was added to lyse the cells and the mixture was  
135 incubated at 37°C for a further 10 min before cooling on ice for 5 min. DNA samples were  
136 sonicated (40 amp) four times at 4°C to obtain an average fragment size of ~500 to 1000  
137 base pairs. Cell debris were removed by centrifugation at 4°C and the supernatant  
138 transferred to a fresh Eppendorf tube. To determine the relative amount of DNA  
139 immunoprecipitated compared to the total amount of DNA, 100 µl of supernatant was  
140 removed, treated with Pronase (0.5 mg/ml) for 60 min at 37°C then stored on ice. To  
141 immunoprecipitate protein-DNA complexes, 800 µl of the remaining supernatant was  
142 incubated with rabbit polyclonal anti-DnaA, anti-DnaD and anti-DnaB antibodies  
143 (Eurogentec) for 1 hour at room temperature. Protein-G Dynabeads (750 µg, Invitrogen)  
144 were equilibrated by washing with bead buffer (100 mM Na<sub>3</sub>PO<sub>4</sub>, 0.01% Tween 20),  
145 resuspended in 50 µl of bead buffer, and then incubated with the sample supernatant for 1  
146 hr at room temperature. The immunoprecipitated complexes were collected by applying the  
147 mixture to a magnet and washed once with the following buffers for 15 min in the respective  
148 order: 0.5X immunoprecipitation buffer; 0.5X immunoprecipitation buffer + NaCl (500 mM);  
149 stringent wash buffer (250 mM LiCl, 10 mM Tris-HCl pH 8.0, 0.5% Tergitol-type NP-40, 0.5%

150 sodium deoxycholate 10 mM EDTA). Finally, protein-DNA complexes were washed a further  
151 three times with TET buffer (10 mM Tris-HCl pH 8.0, 1 mM EDTA, 0.01% Tween 20) and  
152 resuspended in 100 µl of TE buffer (10 mM Tris-HCl pH 8.0, 1 mM EDTA). Formaldehyde  
153 crosslinks of both the immunoprecipitate and total DNA was reversed by incubation at 65°C  
154 for 16 hours in the presence of 1,000 U Proteinase K (excess). The reversed DNA was then  
155 removed from the magnetic beads, cleaned using QIAquick PCR Purification columns  
156 (Qiagen) and used for qPCR analysis.

157

#### 158 *qPCR*

159 To measure the amount of genomic loci bound to DnaA, DnaD and DnaB, the Luna qPCR  
160 mix (NEB) was used for PCR reactions and qPCR was performed in a Rotor-Gene Q  
161 Instrument (Qiagen) using serial dilutions of the immunoprecipitate and total DNA control as  
162 template. Oligonucleotide primers were designed to amplify *oriC* (qSF11/qSF12), *oriN*  
163 (qSF5/qSF6) and the non-specific locus *yhaX* (oWKS145/oWKS146 (Smits et al., 2011)),  
164 and were typically 20–25 bases in length and amplified a ~100 bp PCR product  
165 (Supplementary Table 4). Error bars indicate the standard error of the mean for 6-8  
166 biological replicates.



167 **Supplementary references**

168

169 Anagnostopoulos, C., and Spizizen, J. (1961). Requirements for transformation in *Bacillus*  
170 *subtilis*. J. Bacteriol. *81*, 741-746.

171 Arnaud, M., Chastanet, A., and Debarbouille, M. (2004). New vector for efficient allelic  
172 replacement in naturally nontransformable, low-GC-content, gram-positive bacteria. Applied  
173 and environmental microbiology *70*, 6887-6891.

174 Daber, R., and Lewis, M. (2009). Towards evolving a better repressor. Protein Eng Des Sel  
175 *22*, 673-683.

176 Gatti-Lafranconi, P., Dijkman, W.P., Devenish, S.R., and Hollfelder, F. (2013). A single  
177 mutation in the core domain of the lac repressor reduces leakiness. Microbial cell factories  
178 *12*, 67.

179 Griffith, K.L., and Grossman, A.D. (2008). Inducible protein degradation in *Bacillus subtilis*  
180 using heterologous peptide tags and adaptor proteins to target substrates to the protease  
181 ClpXP. Mol Microbiol *70*, 1012-1025.

182 Hamoen, L.W., Smits, W.K., de Jong, A., Holsappel, S., and Kuipers, O.P. (2002). Improving  
183 the predictive value of the competence transcription factor (ComK) binding site in *Bacillus*  
184 *subtilis* using a genomic approach. Nucleic Acids Res. *30*, 5517-5528.

185 Karimova, G., Ullmann, A., and Ladant, D. (2001). Protein-protein interaction between  
186 *Bacillus stearothermophilus* tyrosyl-tRNA synthetase subdomains revealed by a bacterial  
187 two-hybrid system. J Mol Microbiol Biotechnol *3*, 73-82.

188 Kunst, F., and al., e. (1997). The complete genome sequence of the Gram positive  
189 bacterium *Bacillus subtilis*. Nature *390*, 249-256.

190 Li, C., Wen, A., Shen, B., Lu, J., Huang, Y., and Chang, Y. (2011). FastCloning: a highly  
191 simplified, purification-free, sequence- and ligation-independent PCR cloning method. BMC  
192 Biotechnol. *11*, 92.

193 Liu, H., and Naismith, J.H. (2008). An efficient one-step site-directed deletion, insertion,  
194 single and multiple-site plasmid mutagenesis protocol. BMC Biotechnol *8*, 91.

195 Murray, H., and Koh, A. (2014). Multiple regulatory systems coordinate DNA replication with  
196 cell growth in *Bacillus subtilis*. PLoS genetics *10*, e1004731.

197 Ouellette, S.P., Gauliard, E., Antosova, Z., and Ladant, D. (2014). A Gateway((R)) -  
198 compatible bacterial adenylate cyclase-based two-hybrid system. Environ Microbiol Rep *6*,  
199 259-267.

200 Posfai, G., Plunkett, G., 3rd, Feher, T., Frisch, D., Keil, G.M., Umenhoffer, K.,  
201 Kolisnychenko, V., Stahl, B., Sharma, S.S., de Arruda, M., *et al.* (2006). Emergent properties  
202 of reduced-genome *Escherichia coli*. Science (New York, N.Y) *312*, 1044-1046.

203 Richardson, T.T., Harran, O., and Murray, H. (2016). The bacterial DnaA-trio replication  
204 origin element specifies single-stranded DNA initiator binding. Nature *534*, 412-416.

205 Scholefield, G., Errington, J., and Murray, H. (2012). Soj/ParA stalls DNA replication by  
206 inhibiting helix formation of the initiator protein DnaA. EMBO J. *31*, 1542-1555.

207 Smits, W.K., Merrikh, H., Bonilla, C.Y., and Grossman, A.D. (2011). Primosomal proteins  
208 DnaD and DnaB are recruited to chromosomal regions bound by DnaA in *Bacillus subtilis*.  
209 Journal of bacteriology *193*, 640-648.

210 Taylor, R.G., Walker, D.C., and McInnes, R.R. (1993). *E. coli* host strains significantly affect  
211 the quality of small scale plasmid DNA preparations used for sequencing. Nucleic acids  
212 research *21*, 1677-1678.

213 Wagner, J.K., Marquis, K.A., and Rudner, D.Z. (2009). SirA enforces diploidy by inhibiting  
214 the replication initiator DnaA during spore formation in *Bacillus subtilis*. Mol. Microbiol. *73*,  
215 963-974.

216
